# Supplementary material for: Analysis of venom gland transcriptomes from two Tesseliconus species, Conus eburneus and Conus tessulatus, reveals inter- and intra-specific variations in conopeptide diversity and expression as well as putative novel gene superfamilies and disulfide-poor venom components
Source: Frontiers journal article supplement (doi:10.3389/fmars.2025.1616692), 2025-06-26
Supplement: Table_1.xlsx [file Table_1.xlsx]

## Sheet: Supplementary_Table_S1
SeqID	Ave_Exp	Framework	Superfamily	Signal	Pre	Mature	Post	Blastp_PID	Blastp_Evalue	Blastp_Hit
Ce-0003	539.65	XIV	None			MCRREWSSVVWCSDLSPSSQLYIPASLCDHLNLINMLRLIIAAVLASACLAYPQ	KRDGAPADSANLQPFDAGMQAMPAMPNMQGMQGMPMPGIASQFLPFNPNLGLGYRRDVDENLEKRKHHSKFNEDNKSPFSAEDGLGNFMNFMKENGNLPFAQMDNGAADLGNFEPSAEKEDGKFRFFDEQQ	83.553	3.94e-87	gi|1004614111|gb|AMP44597.1| conotoxin [Conus betulinus]
Ce-0007	10.32	VI/VII	cluster_06	MEFPTFVMVLMAAVLLTNILETEA	RTSLKARLKAKKSVPEETLEDFLER	VEEACEGTPTSCRGKPNGTACCRYGHCFQGVCYI		78.313	5.33e-45	gi|1004614897|gb|AMP44693.1| conotoxin [Conus betulinus]
Ce-0014	165.51	VI/VII	cluster_01	MHTLEMLLLLVLLLMPLAPGEG	DGRTVGGDRNPGEAHRTYKRPLQRPAKRMDRR	ECTPCGPGLCCEPGERCGTSTHHQSYGEPACLNY		79.545	1.74e-40	gi|1004614869|gb|AMP44682.1| conotoxin [Conus betulinus]
Ce-0017	17.08	III	?	MSKLGVVLCIFLILFPMATL	QLDGDQPADLPALRTQDIATDHSPWFDPVKR	CCSRYCYICIPCCPN		87.879	3.49e-40	sp|Q9BPI3|M23B_CONTS Conotoxin TsMMSK-011 OS=Conus tessulatus OX=101317 PE=2 SV=1
Ce-0018	459.05	VI/VII	cluster_05	MKISWIICLLLMAFMIDDGST	RNTMYSRKGAGIASGIKRFQKSFFRR	SCDNCPEEPCCHGDKCMPDPGYEPFCGN		80	1.14e-34	gi|948542547|gb|ALM87484.1| Conotoxin [Conus betulinus]
Ce-0019	9.13	XVII	cluster_01	MLKATVLILAILLLLPLSTA	QDDEGSQENAAQREVDITTR	CSGVGDPCGESAGQSCCGILKCVSSQCCRTTDC		79.73	5.35e-35	gi|1004615041|gb|AMP44751.1| conotoxin [Conus betulinus]
Ce-0025	114.99	XIV	None			MCSAFPTWVGYFFSSSRFSFKSSTSKACALICNCRLVSLV	RRNKAKQK	70	9.88e-14	gi|1247123407|gb|ATF27752.1| conotoxin [Conus praecellens]
Ce-0031	3.48	XXXIII	cluster_04	MNALRSSAVVLLVTLFTQLMTLRA		EDPCLQPKEVGRCDGSFDRFFFNPSSGTCEHFIYGGCDANANNFETFEACEAVCHNQCEQPKEPGSCDYEFVKFFFNSQTGACEEFIYGGCNGNRNNFDTLEDCQGTCLAITL		51.923	1.78e-15	gi|1446202746|gb|AXL95675.1| conkunitzin	partial [Conus ermineus]
Ce-0047	3.86	VI/VII	cluster_06	MEFPTFVMVLMAAVLLTNILETEA	RTSFRARLKAKKFVPGETLREFPER	VEEACEGTPTSCRGKPNGTACCRYGHCFQGVCYI		78.313	2.17e-44	gi|1004614897|gb|AMP44693.1| conotoxin [Conus betulinus]
Ce-0051	14.26	XIV	cluster_15	MKFATVFSLTLLAYVAC		EEVEQEEKVYVLKATNFDKFINENEFVLVEFYAPWCGACKNLAPVYSEVAGKLMDEGSSIKLAKVDVTVEKDLAEKFNVSGYPTIKFFSSGEPTDYTGGRQTSNFINWLKKKTGPPAKEMKTSEEAKTFIDSDEVIVMGFFKDQEGKDAAAFKKIAAEIDDVAFGITSEDSVFKEHKMKKDGVVLFKKFDEGRSDFSGAFEEAAMSKFVKDNRLPLINEFSQETAQKIFSGDVKTHLMLFIKKEGAKDTLDTFKAAAGEFKGKVMFIYLDIAKEENERILEFFGLKAADTPVIRLIQLDEELVKYKPESDSLDKSTMTKFVQDFLDGKLKPHLKSEEVPEDWDAQPVKVLVSKNFKEVAMDKSKAVFVEFYAPWCGHCKELAPIWDQLGEKFKDSKDVI…	RTLEELTKFVESGGKPEPPKKEEEEEEEDDDKKKDEL	38.776	2.07e-14	gi|1790196656|tpg|DAC80631.1| TPA_inf: thioredoxin domain-containing protein 5 [Conus magus]
Ce-0053	130.3	XIV	A	MGMRMMFTVFLLVVLATTVVS	FNSDRASHGRNAAANVKASDLMARVLGKE	CPSHPVPGMHKCMCSNKC	R	86.957	3.59e-40	sp|C6ZJQ2|CAE1_CONPL Alpha-conotoxin Pu14.1 OS=Conus pulicarius OX=93154 PE=1 SV=1
Ce-0056	17.14	XIV	cluster_15	MKFATVFSLTLLAYVAC		EEVEQEEKVYVLKATNFDKFINENEFVLVEFYAPWCGACKNLAPVYSEVAGKLMDEGSNIKLAKVDATVEKDLAEKFEVKGFPTIKFFSSGEPVDYTGGRQTSDIINWLKKKTGPPAKEMKTSEEAKTFIDSDEVIVMGFFKDQEGKDAAAFKKVAAKIEDVAFGITSEDSVFKEHKMKKDGVVLFKKFDEGRSDFSGAFEEAAMSKFVKDNRLPLINEFSQETAQKIFSGDVKTHLMLFIKKEGAKDTLDTFKAAAGEFKGKVMFIYLDIAKEENERILEFFGLKAADTPVIRLIQLDEELVKYKPESDSLDKSTMTKFVQDFLDGKLKPHLKSEEVPEDWDAQPVKVLVSKNFKEVAMDKSKAVFVEFYAPWCGHCKELAPIWDQLGEKFKDSKDVI…	RTLEELTKFVESGGKPEPPKKEEEEEEEDDDKKKDEL	38.889	4.05e-14	gi|1790196656|tpg|DAC80631.1| TPA_inf: thioredoxin domain-containing protein 5 [Conus magus]
Ce-0058	24.03	XIV	A	MGMRMMFTVFLLVVLATTIDS	FILDRASDGR	DATVISTESDVIALDDCRLCMHPDCRFNRGRCRPRA		70.312	3.83e-28	gi|218944618|gb|ACL13208.1| conotoxin Pu14.3 [Conus pulicarius]
Ce-0059	135.44	VI/VII	?	MKLTYVLIIAVLLLTTCQL	ITTASYARSERKHPDLRSSNQNSKLTKR	CFESGDRCWPGSICCSLSCINSVCL		72.222	1.96e-33	sp|Q9BP96|O1615_CONVE Conotoxin VnMKLT2-0221 OS=Conus ventricosus OX=117992 PE=2 SV=1
Ce-0062	1848.68	XIV	None			MCRREWSSVVWCSDLSPSSQLYIPASLCDHLNLINMLRLIIAAVLASACLAYPQ	KRDGAPADSANLQPFDAGMQAMPAMPNMQGMQGMPMPGIASQFLPFNPNLGLGYRRDVDENLEKRKHHSKFNEDNKSPFSAEDGLGNFMNFMKENGNNLPFAQMDNGAPDLGNFEPSAEKEDGKFRFFDEQQ	84.211	2.8e-89	gi|1004614111|gb|AMP44597.1| conotoxin [Conus betulinus]
Ce-0063	46.96	XV	?	MEKLTIRILVATVLLAIQVLVQS	DGESPLNGRVKQYAAKR	LSALMRGPSQCTTRHQPCDEDEECCPYLECKCFSRPDCQSGYKCKP	R	91.954	2.11e-57	gi|482544090|gb|AGK23202.1| XV conotoxin Vt15a precursor [Conus planorbis]
Ce-0071	7.22	VIII	cluster_16	MDMKMTFSGFVLVVFVTTVVG		WPDLPIEVSDNLAHCWLPQLRVCFVVCSELGIEADCFASCTSAIGEKHGPQTEEFDCEIFRICYGRCMILGKSERHCWKGTASSVTGKESDLETC		68.103	5.18e-57	gi|948542615|gb|ALM87518.1| Conotoxin [Conus betulinus]
Ce-0074	84.39	XV	cluster_01	MSTLGMVLLLLLLLLPLGNS	DGDGDRQAMDRDRTASEARSAPRLRLRRHMDRGRSADKR	CSTITCGGDCCASSECTCTSHGGTGNEVGCSCPVMAILL	K	84.848	1.29e-47	gi|948542573|gb|ALM87497.1| Conotoxin [Conus betulinus]
Ce-0084	11.26	VI/VII	cluster_06	MEFPTFVMVLMAAVLLTNILETEA	RTSLRARLKAKKSVPGETLREFPER	VEEACEGTPTSCRGKPNGTICCRYGHCFQGVCYI		78.313	8.36e-45	gi|1004614897|gb|AMP44693.1| conotoxin [Conus betulinus]
Ce-0086	5.06	VI/VII	None		MSLLDRLAKR	CSGFGAVCDPLNHNCCSGECFGFPNFGFCT		65.714	5.35e-13	P07704|Ca6.10 precursor|Conus caracteristicus|Precursor|conotoxin|O1 superfamily|VI/VII||nucleic acid level
Ce-0088	13.74	V	cluster_13	MTLSMLVMVVMATAVSDS	TPVHETKARSAPWEVQSLAR	QPVSCCRLVLLMEWCCL	G	61.111	1.96e-16	gi|1782804342|gb|QGV13643.1| conopeptide [Conus arenatus]
Ce-0089	205.8	None	T	MLCLPVFIILLLLVSPAAT	VPVESEVQRDLAQESLKDLGMRTEPLPRK	PWVDCTQFPESCQDSGFKA		68.852	7.3e-25	gi|1247123025|gb|ATF27561.1| conotoxin [Conus andremenezi]
Ce-0091	78.86	VI/VII	?	MNLACALIVAVLFLTACQL	TTTNDSRGRREYPTKRWRVKMPNFKLFKQTMR	CTAPGGSCSLWFNECCSNFCTLRISGPVCREKSS		67.47	1.18e-37	gi|1004614944|gb|AMP44712.1| conotoxin [Conus betulinus]
Ce-0094	35.15	XIV	cluster_03	MKLSVMVIVLVLAMAFTPGLL	LHDDNEGKALGRHDRHVRDTLTDERAKR	TKCVNSSTCPSPLVCRLGVCDQYNSDM	GR	78.205	1.44e-38	gi|1004614887|gb|AMP44689.1| conotoxin [Conus betulinus]
Ce-0097	465.59	VI/VII	O3	MSGLGIMVLTLLLLVFMATSHQ	DAGEKQATQRDAINVRRRRSITRR	VDEECNEYCDDRNKECCGRTNGHPRCANVCF	G	100	1.83e-55	sp|Q9BP76|O364_CONTS Conotoxin TsMSGL-11 OS=Conus tessulatus OX=101317 PE=2 SV=1
Ce-0100	173.78	XIV	cluster_03	MKLSVMFIVFLMLTMPVIDA	GHSRRAANEGEAGMLADDRAANLMVLLQER	QCPPSCQSCSHC		72.581	2.47e-26	P05662|Pu14.4 precursor|Conus pulicarius|Precursor|conotoxin|L superfamily|||
Ce-0101	353.76	VI/VII	?	MNLTCALIIAVLLLTACQL	TTTVDSRGKLEYLTKRSRAKMQNHKLSKLTKR	CDPPGSGCTFWENECCNTCQLREKEPPVCVV		82.857	8.61e-40	gi|1004615142|gb|AMP44785.1| conotoxin	partial [Conus betulinus]
Ce-0108	6.27	IX	None		MLLFALGNFVGVQPEQITRDVDNGQLTDNRRNLPSQWKPLSLFKSLDER	QSCTGSCNADSDCGFLCGCWNNECFPIVVT		73.611	1.62e-34	gi|570999661|gb|JAB84642.1| P_Vc14.5 prepropeptide [Conus victoriae]
Ce-0109	330.94	None	T	MLCLPVFIILLLLASPAAP		NPLERRIQSDLIRAVLEDADMKTEKGILSSIMGALGSIVG		98.305	1.55e-36	gi|12619525|gb|AAG60424.1|AF214996_1 conotoxin precursor [Conus tessulatus]
Ce-0124	202.55	XVI	T	MLCLPVFIILLLLASPAAL	NPLERRIQSDLIR	AALEDADMKSEKGILSIMGKLGKVVNIGGIASSILCSVCTSCCSTE		72.152	5.57e-33	sp|Q9BHA6|CT51_CONAE Conotoxin Ar5.1 a OS=Conus arenatus OX=89451 PE=3 SV=1
Ce-0126	2.59	VI/VII	?	MKLTYVLIVAVLFLTACQLTTA	DYSRSKQMHRALRSTDKNSKLTR	DCTPPGGACGGHAHCCSKSCNIMASTCQ		85.507	6.09e-39	sp|Q9TVU1|O16C_CONAB Conotoxin AbVIC (Fragment) OS=Conus abbreviatus OX=100123 PE=2 SV=1
Ce-0129	523.1	XIV	cluster_03	MKLSAMFIVILMLTMPVIDA	GHSRRAANEGEAGMLADDRAANLMALLQER	QCPPMCRSCSNC		66.129	1.6e-25	gi|1767129472|gb|QFQ61025.1| conotoxin superfamily L [Conus magus]
Ce-0133	29.45	V	?	MLRLPIFLILLLSLSSAAG	FPELQRDLTQHSPKDFGMRTDHLLLKK	VGDDCCVDGNIGTCC	KK	70.769	7.58e-27	gi|1004614450|gb|AMP44631.1| conotoxin [Conus betulinus]
Ce-0137	6.1	VI/VII	H	MNTAGRLLLLCLALGLVFESLG	IPVADDVEADRDTDPEDEDAR	ALDSWFVHEETCGSGTCRFGCCETIDGEEKCREINCDLPDPLRHF	G	80	6.78e-34	gi|1446202284|gb|AXL95444.1| conotoxin precursor superfamily H [Conus ermineus]
Ce-0144	79.51	VI/VII	cluster_06	MEFPTFVMVLMAAVLLTSIVETEA	RTSFRARLKAKKFVPGETLREFPER	VEEACEGTPTSCRGKPNGTICCRYGHCFQGVCYI		75.904	3.73e-43	gi|1004614897|gb|AMP44693.1| conotoxin [Conus betulinus]
Ce-0154	248.22	XXVII	cluster_06	MRSHLLLTVMLLLTLFTGGDA	GPRRANRLEKHFVNR	DCQSGCVGCHNPAGCCCGNQVCVNNNHCEPSSLWF		78.182	3.04e-28	P08590|Ml27.2 precursor|Conus miliaris|Precursor|conotoxin|G2 superfamily|XXVII||nucleic acid level
Ce-0160	14.1	VI/VII	O2	MEKLTILLLVAAVLMSTLFLA	QGVGEKTQKAKINLFKARKLSGNKQTR	GNCIGWSAYCGPWNNPPCCTGYVCEGVYCALDW	K	65.385	3.55e-29	sp|Q9BPC2|O266_CONVE Conotoxin VnMEKL-0111 OS=Conus ventricosus OX=117992 PE=2 SV=1
Ce-0161	8315.67	XIV	None			MRPLQTVPGCEIWKADCSFRACSWNFEWSLTTRCHLQATISLSFHLWNWMI		94.118	1.99e-32	gi|920152395|dbj|BAS23841.1| Conotoxin Superfamily T [Conus episcopatus]
Ce-0162	3.7	VI/VII	O1	MKLTCVLIVAMLFLMACQLITAVYS	REKQGYPAVRSSDKIQDSDHIMLTKR	CTDNGDACEPGNHNCCSGSCIASEAGDYCAMSVEYEYVSMVS	R	71.277	4.2e-45	gi|1004614936|gb|AMP44709.1| conotoxin [Conus betulinus]
Ce-0163	259.29	VI/VII	O3	MSGLGIMVLILLLFMFMATSHQ	DAGEKQATQRNAVNVRRRR	SIAGRTVTEECDEYCEDRNKNCCGVTNGEPVCATACL	G	89.873	1.55e-50	sp|Q9BP73|O367_CONTS Conotoxin TsMSGL-2 OS=Conus tessulatus OX=101317 PE=2 SV=1
Ce-0164	14.44	VI/VII	O3	MSGLGIMVLILLLFMFMATSHQ	DAGEKQATQRDAINVRRRRSITRR	VDEECNEYCDDRNKECCGRTNGHPRCANVCF	G	97.436	6.71e-54	sp|Q9BP74|O366_CONTS Conotoxin TsMSGL-12 OS=Conus tessulatus OX=101317 PE=2 SV=1
Ce-0168	39.73	VI/VII	cluster_01	MHTLEMLLLLILLLLPLAPG	EGDGRAVGGDTNPGEAHRTYKRRLQRSARRMDRR	ECTPCGPGLCCEPGERCGTSTHHQSYGEPACLNY		79.545	8.65e-40	gi|1004614869|gb|AMP44682.1| conotoxin [Conus betulinus]
Ce-0171	84.19	XV	?	MEKLTALMVVAVVLMLIQVKG	QGKQGNSPKDVHKRLRDSFVQRVRR	CQEPSESCNESGECCEPYVCKCTSGSVCNARCSKAPPA		57.692	4.03e-26	gi|1004614366|gb|AMP44617.1| conotoxin [Conus betulinus]
Ce-0176	6.76	VI/VII	O1	MKLTCMMIVAVLFLTAWTFVTA	DDFGNGLENLFPKARHEAKNPEVFKLIKR	CLGNGETCDVMSEPFCCSGQCFIVCY		73.333	1.49e-34	P01940|Sequence 324 from patent US 6762165|Unknown|Patent|conotoxin||||
Ce-0178	12.3	IX	cluster_06	MEFRRLVTVALLLTLVMSVDS	APAGQTETGRVSLR	EGMENPFPCNPGRCACLPREGSSTSYQCQSTESSTDDCVDNECITEDEW		75.949	3.51e-40	P07740|Ca9.1 precursor|Conus caracteristicus|Precursor|conotoxin||IX||nucleic acid level
Ce-0183	7.07	XI	?	MMCRLTSLWCLLVIVLLNSAVDG		IPCTGPGGFCHSHMWCCNSLDICCELPGPATCTREEACETLQDAL	GRRAQYKRFFRR	87.654	9.99e-49	sp|C7DQB9|I2B3_CONEB Conotoxin Eb11.3 OS=Conus eburneus OX=101300 PE=3 SV=1
Ce-0188	53.59	VI/VII	O1	MKLMCVLIIAVLFLTACQLITA	DYSRDKQEDPVVRSSDKVQRSKHRKLAKR	CSEVGAACDTESNICCSGECFAVQGSTFGICE		97.26	1.2e-48	gi|444474829|gb|AGE10507.1| conotoxin Bt6.2 [Conus betulinus]
Ce-0189	4.47	I	A	MGMRMMFTVFLLVVLATTVVS	DRASNRENRR	ASNWNTRMALIGCCDIPGCYNANREQCLEEGS	G	90.625	2.77e-40	gi|300085636|gb|ADJ67512.1| alpha conotoxin Im1.95 precursor [Conus imperialis]
Ce-0191	189.98	XII	cluster_17	MMTSSYFLLVALGLLLYVCQSSFG		QEHLCEPEDPPHPQGKCGIELYSHYIESCEEEEAEQSRTYYAWKKRGRASPLRKRRGFLSMLKTRVMAPSRGIVCECCQNHCTEEEITEYCPPLTESS	G	67.176	2.01e-45	P06945|Con-ins Q1b precursor |Conus quercinus|Precursor|coninsulin|Insulin superfamily|||nucleic acid level
Ce-0194	10.05	VIII	cluster_11	MLLAYFRPSAFTSPATMRRAVILFSCIVLAVQA		SDVLEFTDSNFESKIKELDVALVEFYAPWCGHCKRLAPEYDSAAKQLKKSDPPVPLVKVDCTAETKTCQEYGVSGYPTLKIFKGGEFAKDYNGPRESKGIISTMLKEAGPASRELEDFKQYEDFIGRETACLVGFFADADSEMAKTFSKLADTHEGDVRFGHTTASAIMDKAKYKDEIVLFRPKAMQNKFEDSAVKFTGDATKKSAIKEFMTQEHLGMCGLRTINNAGDFSKPTFVAFYDVDYVKNPKGSNYWRNRVMKVGKKLRDEGLKVFFGVSNREEHSHELGECGLQDAEGDKPIVCAYDEKNRKFKMEEEFSVDSFEKFVRGVLNGEVEAYLKSEPVPENNDQPVKVVVAKNFDELVNDPEKDVLIEFYAPWCGHCKSLAPKYDELAEKLKDET…	KKYEGGREVNDFIKYLAKEATDELQGFDRKGKKKSGQKQKKKKTEL	34.653	1.06e-13	gi|1790196656|tpg|DAC80631.1| TPA_inf: thioredoxin domain-containing protein 5 [Conus magus]
Ce-0196	12.07	III	?	MMSKLGVLLIICLLLFPLTA	VPLDGDQPADRPAERRQDIATDDHPLFDPVKR	CCHTCYMGCIPCCF		84.848	2.02e-39	gi|371933577|gb|AEX60263.1| M superfamily MMSK group conopeptide Ca3-IP04 [Conus caracteristicus]
Ce-0203	15.61	None	T	MLCLPVFIILLLLASPAAL		NPLERRIQSDLIRAALEGSTE		97.222	1.14e-18	sp|Q9BPD7|CT0C_CONTS Conotoxin TsMLCL-02 OS=Conus tessulatus OX=101317 PE=3 SV=1
Ce-0207	368.77	VI/VII	cluster_05	MKISWIICLLLIAFMIDDGST	RNTMYSRKGTGIASGIKRFQKSFFRR	SCDNCPEEPCCHGDKCMPDPGYEPFCGN		80	3.64e-34	gi|948542547|gb|ALM87484.1| Conotoxin [Conus betulinus]
Ce-0208	178.86	XXII	None			MTIDDDSCFKSNSREEACIQLALSTLSVEFLTLVLFTSWLTTQKGNTAVKMHLSLARSAVLMLLLLFALGNFVGVQPGQITRDVDNGQLTDNRRNLRSQWKTVRLFRSLDKRDSCEGFCNKSSECESVCTCHSNECLFLI		68.235	9.71e-38	gi|1247123357|gb|ATF27727.1| conotoxin [Conus praecellens]
Ce-0210	395.1	III	M	MMSKLGVLLTICLLLFPLTAVQL	DGDQPADLPALRAQDFAPERSPWFDPVRR	CCSQDCSVCIPCCPN		100	7.29e-45	gi|371933691|gb|AEX60320.1| M superfamily MMSK group conopeptide Ts3-IP05 [Conus tessulatus]
Ce-0211	119.46	VI/VII	O1	MKLTCVVIVAVLFLTACQLITA	DDSRSTQKHRALRSTTKLSKLTR	ECTPYGGVCGIYSNCCGVCNVPLNSCM		84.507	7.1e-40	gi|1446202330|gb|AXL95467.1| conotoxin precursor superfamily O1 [Conus ermineus]
Ce-0218	30.56	XIV	?	MKFSSCLVLTLLVFVSA	EDVKQEESVHVLTTK	NFDSFIADNEFVLVEFYAPWCGHCKALTPEYAKAAATLEEEESNIKLAKVDATVEQSLASKFDVRGYPTIKFFRKEKPDSPADYNGGRQAVDIVNWLKKKTGPPAKELKKKDDAKSFVEKDEVVVIGFFKDQESAGALAFKKAAAGIDDIPFAITSEDHVFKEYKMDKDGIVLLKKFDEGRNDFEGEFEEEAIVKHVRENQLPLVVEFTQESAQKIFGGEVKNHILLFLKKEGGEDTIEKFRGAAEDFKGKVLFIYLDTDNEENGRITEFFGLKDDEIPAVRLIQLAEDMSKYKPESSDLETATIKKFVQDFLDGKLKPHLMSEDVPDDWDAKPVKVLVGKNFKEVAMDKSKAVFVEFYAPWCGHCKQLAPIWDELGEKYKDSKDVVVAKMDATANEIE…	RTLDAFVKFLESGGMEGAGVPEDEEEEDEEGDDEDLPRDEL	39.13	1.35e-13	gi|1790196656|tpg|DAC80631.1| TPA_inf: thioredoxin domain-containing protein 5 [Conus magus]
Ce-0221	155.43	XIII	cluster_04	MNFLQLLLVLLLVSTITA	LYQDRRATQRRGRNIR	TMSNLLNIQTRECPSGCPVTCPDRNECCSGITCTYTTPGGPYYCIGCGGGGGD		85.185	6.26e-37	gi|948542563|gb|ALM87492.1| Conotoxin [Conus betulinus]
Ce-0223	10.33	XIII	cluster_04	MNFLQPLLVLLLISTITA	FYQDGRATQRSGRNIRTMSNLLNIQRR	ECPTGCPVSCPDRNECCSGITCTYTTPGGPYYCIGCGGGGGD		85.185	7.97e-37	gi|948542563|gb|ALM87492.1| Conotoxin [Conus betulinus]
Ce-0230	5.55	XXXIII	cluster_09	MFTRYTAVRRTARSIPASNVHGTLTASTPNVAHVAFLPCWRLRNKMRVLESAVWILTALSLPWVVA		WDSSTAELCKENSNGCSVPFQWMPCQEQFRPACDRHDTCYVCGAHFHFTQDDCDNAFFTDMTALCSDKRNRREASSMSITTPLRQQELQEKLMPLNSLSDRDPRQPQERFVACTQCASAYSAATKSVGSWYFYKTANAMYCHKFKACMPEI		63.587	8.52e-83	gi|570999801|gb|JAB84712.1| Conodipine_Vc2 prepropeptide [Conus victoriae]
Ce-0231	6.03	XXII	?	MARFLSILLVIAIAVALA	AGIYYPNDDRPIR	PCSTNDISKTEVYSTRYDSYVPGYSYCSCASGEVHFEAEDTTSSFDTVPHKIYSCGAPTYSCSGGTLPVTDFSAEEPRRMQCTCGQYTYFVRSSWYVRCIPLEQ		43.846	7.21e-29	sp|A0A125S9F9|CXE2_CONIM Conotoxin Im14.2 OS=Conus imperialis OX=35631 PE=1 SV=1
Ce-0234	95.1	None	O2	MGKLTILVLVAAALLSTQVMVQG	DGDQPEDRDAVPRDDNPGGTSGKFMNVLR	QSGCPWSPWC	G	90.476	6.83e-39	sp|P0C248|COW_CONAA Contryphan-Am OS=Conus amadis OX=198732 PE=1 SV=2
Ce-0236	98.46	XV	cluster_01	MSTLGMVLLLLLLLLPLGNS	DGDGDRQAMDRDRTASEARSAPRLRLRRHAVHGRSANKR	CSTKICGDDCCSSSACECEVHGGTSNEVGCSCPVMILL		85.567	9.85e-50	gi|1004614931|gb|AMP44707.1| conotoxin [Conus betulinus]
Ce-0238	4.45	IX	?	MSKVGVVLLIFLVLLSLAAL	QNGDDPRRQRDEKQSPRRGIVRGTLRNYHSQRR	CVNSSPCSECTSEGKTCQVQPGGKGTCGECV		78.161	6.35e-31	gi|1004614851|gb|AMP44675.1| conotoxin [Conus betulinus]
Ce-0240	29.7	I	A	MGMRMMFTVFLLVALATTVVS	DRASNRENRR	ASNWNTRIAYIGCCDIPDCYNKNREQCLDESS	G	98.438	3.11e-44	gi|300085636|gb|ADJ67512.1| alpha conotoxin Im1.95 precursor [Conus imperialis]
Ce-0241	14.03	XXII	cluster_01	MMTLKHVLLFTLLLLPLATIRA		EVYACTYWTSPGWAVKRCQTHSDCVPYCGSHFRCRCQPGANLCPGGAGCFQTS		75	1e-30	gi|1004614899|gb|AMP44694.1| conotoxin [Conus betulinus]
Ce-0245	8.17	V	?	MLRLPIFLILLLSLSSAAG	FPAESELQRDLALQSPKDFGMRTDHLLLKR	VGDDCCVDGHIGTCC	KK	69.231	2.45e-28	gi|1004614450|gb|AMP44631.1| conotoxin [Conus betulinus]
Ce-0246	2.4	XV	?	MEKLTIRILVATVLLAIQVLVQS	DGESPLNGRVKQYAAKRLSALMRGPR	QCTTRHQPCDEDEECCPYLECKCFSRPDCQSGYKCKP	R	93.103	3.85e-58	gi|482544090|gb|AGK23202.1| XV conotoxin Vt15a precursor [Conus planorbis]
Ce-0254	11.8	VIII	cluster_12	MKLFMFAAIIFTMASTTVTA		DQCANNQKVCIWEGAGDQNCDCIGYDCQMDDAHKVSAGGAAFYTCQEISAFDECVEGTRSVMDADWTQLNCRCRSGTYNIDQGAVVC	G	68.224	6.01e-49	sp|B0L0Y6|CX8_CONCB Putative conotoxin OS=Conus caracteristicus OX=89440 PE=2 SV=1
Ce-0257	897.27	VI/VII	O1	MKLTCVVIVAVLFLTACQLITA	DDSRSTQKHRAVRSTTKLSKLTR	ECTPYGGVCGIYSNCCGVCNVPLNSCM		83.099	1.91e-39	gi|1446202330|gb|AXL95467.1| conotoxin precursor superfamily O1 [Conus ermineus]
Ce-0259	60.41	XXXIII	cluster_02	MKIYLCLAILLLASTIVYS	GLLDKIDTERR	QDVYCEACNCAELRTPRCTDPIYCETFDCPFWPSCGKGKCACTRFVSGRCTRYVECVPGQC		48.485	3.49e-16	gi|1004614884|gb|AMP44688.1| conotoxin [Conus betulinus]
Ce-0263	2.87	XXII	cluster_04	MDALRFSAVLLIVAMACFLTVSA		GICEKAKDEGTGNQNIRSFFFNSATGTCDIFFYKGSGNNDPFPNRFSSNSDCENVCQCKLRMDPGTGERPRTRYYHNTDGSGCLPFQYRGIGGNKNNFDSESKCEMECEL		70.455	3.07e-67	gi|763708650|gb|JAG92870.1| Ctr_75_N conopeptide precursor [Conus tribblei]
Ce-0266	73.14	XXII	None			MAIEDDSCFKSSSGEEACIQLALSTLSVEFLTLVLFTSWLTTQKGNTAVKMHLSLARSAVLMLLLLFALGNFVGVQPGQITRDVDNGQLTDNRRNLRSQWKPMSLFKSLDKRQSCSGSCNVDSDCESLCDCWRNQCFFFT		75.641	1.05e-40	gi|1247122891|gb|ATF27494.1| conotoxin [Conus andremenezi]
Ce-0269	30.34	XI	I2	MMCRLTSLCCLLVIVLLNSAVG		RTSCAAGFLAHCSSSNPCCISYDTCCDVSGTGMCISSGACESLQKALAQYN		50	2.98e-16	sp|C7DQB9|I2B3_CONEB Conotoxin Eb11.3 OS=Conus eburneus OX=101300 PE=3 SV=1
Ce-0272	6.23	VIII	cluster_11	MLLAYFRPSAFTSPATMRRAVILFSCIVLAVQA		SDVLEFTDSNFESKIKELDVALVEFYAPWCGHCKRLAPEYDSAAKQLKKSDPPVPLVKVDCTAETKTCQEYGVSGYPTLKIFKGGEFAKDYNGPRESKGIISTMLKEAGPASRELEDFKQYEDFIGRETACLVGFFADADSEMAKTFSKLADTHEGDVRFGHTTASAIMDKAKYKDEIVLFRPKAMQNKFEDSAVKFTGDATKKSAIKEFMTQEHLGMCGLRTINNAGDFSKPTFVAFYDVDYVKNPKGSNYWRNRVMKVGKKLRDEGLKVFFGVSNREEHSHELGECGLQDAEGDKPIVCAYDEKNRKFKMEEEFSVDSFEKFVRGVLNGEVEAYLKSEPVPENNDQPVKVVVAKNFDELVNDPEKDVLIEFYAPWCGHCKSLAPKYDELAEKLKDET…	KKYEGGREVNDFIKYLAKEATDELQGFDRKGKKKGGQKQKKKKTEL	34.653	1.03e-13	gi|1790196656|tpg|DAC80631.1| TPA_inf: thioredoxin domain-containing protein 5 [Conus magus]
Ce-0278	62.43	XIV	A	MGMRMMFTVFLLVVLATTVDS	FILDRASDGRDAAANDKASDVTAR	ADCNRCMSPACGIKFGEC	R	68.75	5.18e-25	gi|218944618|gb|ACL13208.1| conotoxin Pu14.3 [Conus pulicarius]
Ce-0279	20.6	XII	cluster_06	MGFFLMLTVAVLLTSLICTDG	APAEKLEVK	RDCSDDCVTCSSDAPCGCCGNVICHSTGLCQLVSDPYGEYDYY		56.579	4.13e-21	gi|1247123541|gb|ATF27819.1| conotoxin [Conus praecellens]
Ce-0281	5.87	VI/VII	O1	MKLTCMMIVAVMFLTAWTFVTA	DDSINGLENRDIWGEPLSKARDEMKNPEASKR	HCWTPGWFCGLGRHKCCKGCLFFCF		76.543	5.95e-38	P03126|Ts6.1 precursor|Conus tessulatus|Precursor|conotoxin|O1 superfamily|||nucleic acid level
Ce-0282	70.52	XIV	A	MGMRMMFTVFLLVVLATTIDS	FILDRASDGR	NAAVISTESDVIVTCKPCVNPACGINRGKC	R	83.871	9.63e-35	gi|218944615|gb|ACL13207.1| conotoxin Pu14.2 [Conus pulicarius]
Ce-0287	16.87	XIV	?	MESTSSSSSVVFAVWLRNVWA		VVVVVCVCSILTGCVRILPTSSSRSFWWIHSTRPSDVTPRPTGSATLSTSTARCVA		97.403	1.18e-47	gi|948542619|gb|ALM87520.1| Conotoxin [Conus betulinus]
Ce-0290	100.25	XIV	cluster_03	MKLSVMFIVFLMLTMPVIDA	GHSRRAANEGEAGMLADDRAANLMALLQER	LCPPMCRSCSNC		70.968	5.73e-28	gi|1767129472|gb|QFQ61025.1| conotoxin superfamily L [Conus magus]
Ce-0291	53.59	XII	None		MQAIVTRVSHR	LPDPCTASLTSSFFAASFGITKAIINMKLTCVVIVAVLFLTACQLITADDSINGLENRDIWGEPLSKARDKMNPEASKLNKRCLPPGEYCESGLECCSGICFILCLS		66.667	1.91e-31	P03126|Ts6.1 precursor|Conus tessulatus|Precursor|conotoxin|O1 superfamily|||nucleic acid level
Ce-0292	1525.65	V	T	MLCLPVFIILLLLASPAAP	NPLERRIQSDLIR	AALEDADMKTEKGILSNIMGNLGNIGNMAGSFCCSVYSGCCPE	K	85.526	4.99e-45	sp|Q9BPE3|CT53_CONTS Conotoxin TsMLCL-03 OS=Conus tessulatus OX=101317 PE=3 SV=1
Ce-0295	1508.27	III	M	MMSKLGVLLTMCLLLFPLTAVRL	DGDQHADRPADRMQDIATEQHPLFDPVKR	CCDWPCTIGCVPCCLP		100	2.13e-46	gi|371933613|gb|AEX60281.1| M superfamily MMSK group conopeptide Ts+Ec3-VP01 [Conus tessulatus]
Ce-0296	411.1	VI/VII	O1	MKLTCMMIVAVLFLTAWTFVMA	DDSSNGLENLFLKARYEMNPEASKLNTK	RCVAGGQFCGFPKIGGPCCSGWCFFVCA		86.076	5.54e-45	sp|Q9BPA2|O1611_CONVE Conotoxin VnMKLT1-01121 OS=Conus ventricosus OX=117992 PE=2 SV=1
Ce-0300	909.27	III	M	MLKMGVVLFTFLVLFPLATL	QLDADQPVERYAENKQDLNPDERMRFILSSPGRFR	CCISPLCDGCICCIT	G	81.69	7.24e-38	gi|371933158|gb|AEX60054.1| M superfamily MLKM group conopeptide S3-I05 [Conus striatus]
Ce-0310	21.7	IX	None			MNPVTNPAHPMNPANPYSPMNPMTNPAHPMNPYNSMNPMNGLYNGMYSAYPFHPPMQVASYFLTPPLGTSYLLPMNGYGHVHPVPTQAASNLLHPSLAAASPLNLHMHFPYSYPAGMYSPYFLPPYQPSAALQAVYPPYGGVPGAMPWHQFGGAAWNPYSSMGFGAYPLWPSQFAHMWPMHPYYQTVMPAQEGICSYDRPFQCWGSATCITIDAVCDKNFDCNNHADEDPRICIS	GRRPDYGTLVSYLALPDQQWMLQKLFNNVDPYTTAYALKLATSLGDLRWSLVLTDENVNNTKTVLEAVKNDDKEPLEALGMQASAWESVKFLMNSLLSTDFFLD	70.725	7.28e-176	gi|1247122913|gb|ATF27505.1| conotoxin [Conus andremenezi]
Ce-0313	448.75	XI	?	MFRFTSLSCFLLVIVFLNLVVLTSA		CRSEGTMCENDSQCCNSECCWGSCSNPCRVP	GRRAKLQEFFRQR	78.261	6.18e-37	sp|P0C258|I2B2_CONSR Kappa-conotoxin-like Sx11.2 OS=Conus striolatus OX=101315 PE=2 SV=1
Ce-0315	14.47	I	A	MGMRMMFTVFLLVVLATTVVS	DRSSNRKNRRASNWNTRR	ALIDCCDIPRCYNEHQEECREESS	G	85.938	5.11e-36	P07670|Ca1.9 precursor|Conus caracteristicus|Precursor|conotoxin|A superfamily|I||nucleic acid level
Ce-0320	20.37	VI/VII	cluster_06	MEFPTFVMVLMAAVLLTSIVETEA	RTSLKARLKAKKSVPEETLEDFLER	VEEACEGTPTSCRGKPNGNACCRYGHCFQGVCYI		75.904	8.11e-44	gi|1004614897|gb|AMP44693.1| conotoxin [Conus betulinus]
Ce-0321	69.46	XIV	cluster_03	MNFSVMFIVALVLTLSMTDG	FIRPAENGGRTFRQHSPDAKDLQTHQIKTR	DLCPHCPNGCHVDRTCI		83.582	1.99e-40	gi|1004614907|gb|AMP44697.1| conotoxin [Conus betulinus]
Ce-0322	6.39	XIV	?	MSVMMIVLLVLGLSSTDG	AIFRNINGREASGRHNPDAMVQLILKGDDGR	CGSLCPPGQCTMQCTPKDP		59.701	1.28e-19	gi|1446202518|gb|AXL95561.1| conotoxin-like precursor unassigned superfamily 03 [Conus ermineus]
Ce-0326	10.05	VI/VII	O1	MKLTCMMIVAVMFLTAWTFVTA	DDSINGLEDRGIWGEPLSKARDEMNPEVSKR	DCWPRYWFCGLQRGCCTGTTCFFLCF		93.671	5.72e-54	P03126|Ts6.1 precursor|Conus tessulatus|Precursor|conotoxin|O1 superfamily|||nucleic acid level
Ce-0339	30.84	VI/VII	O3	MSGLGIMVLTLLLLVFMATSHQ	DAGEKQATQRDAVNFRRRRSIARR	TADEECKEECSNQDKNCCGRTNGQSVCAKICL	G	79.747	4.62e-42	sp|Q9BP73|O367_CONTS Conotoxin TsMSGL-2 OS=Conus tessulatus OX=101317 PE=2 SV=1
Ce-0349	12.67	None	O2	MGKLTILVLVAAALLSTQVMVQG	DGDHLADRDAVPRDDNPGGTREKIMNALRRF	GCPPGLWC	G	98.413	4.44e-42	gi|444474861|gb|AGE10523.1| Contryphan conotoxin precursor analog Bt1 [Conus betulinus]
Ce-0358	1986.9	III	M	MMSKLGVLLTICLLLFPLTA	VPLDGDQPADQPAERKQNEQHPLFDQKR	GCCRWPCPSRCGMARCCSS		100	2.95e-46	sp|H2BKS9|CM3A_CONTS Mu-conotoxin TsIIIA OS=Conus tessulatus OX=101317 PE=3 SV=1
Ce-0360	145.54	VI/VII	O1	MKLTCVVIVAVLFLTACQLITA	DDSRSTQKHRALRSTTKLSKLTR	DCTPPGGLCGFHSDCCGVCNVLQNSCM		81.69	2.08e-39	gi|1004614956|gb|AMP44717.1| conotoxin [Conus betulinus]
Ce-0362	687.93	XIV	None			MRPLQTVPGCEIWKADCSFRTCSWNFEWSSTTRCFLQATISLSFHLWNCMF		92.157	9.72e-32	gi|920152395|dbj|BAS23841.1| Conotoxin Superfamily T [Conus episcopatus]
Ce-0364	110.07	XV	?	MEKLIALMVVAAVLVLIEVKVQG	KQGNSPKDVHKRLRDSFVQRVRR	CYEASEPCTENSECCSPYVCRCTSGSVCNAKCSASSSA		59.259	5.26e-31	gi|1004614366|gb|AMP44617.1| conotoxin [Conus betulinus]
Ce-0373	451.08	None	B1	MQLYTYLYVLVPLVTFYLILGTGTLA		HGGALTERRSAEATALKPEPVLLQKSAARSTDDNGKDRLTQRKRILKKRGNKARGWEEDREIAETVRELEEIGRR		88.119	2.28e-61	P05676|conantokin-Pu2 precursor|Conus pulicarius|Precursor|conantokin|B1 superfamily|||
Ce-0382	47.96	XVI	T	MLCLPVFIILLLLASPAAP	NPLERRIQSDLIR	AALEDADMKSEKGILSIMGKLGKVVNIGGIASSILCSVCTSCCSTE		72.152	3.79e-33	sp|Q9BHA6|CT51_CONAE Conotoxin Ar5.1 a OS=Conus arenatus OX=89451 PE=3 SV=1
Ce-0387	44.19	III	M	MGVVLFIFLVLFPLATLQLEA	DQPVERQQDLNVGDTRGIMRHAISKGTSFR	GCCTGSACWNVPTCECCDD		87.143	9.17e-43	gi|371933512|gb|AEX60231.1| M superfamily MLKM group conopeptide Ts3-G01 [Conus tessulatus]
Ce-0390	484.9	XV	?	MEKLIALMVVAAVLVLIEVKVQG	NSPKDVHKRLRDSFVQRVRR	CYEASEPCTENSECCSPYVCRCTSGSVCNAKCSASSSA		58.025	3.47e-28	gi|1004614366|gb|AMP44617.1| conotoxin [Conus betulinus]
Ce-0391	2.79	XXXIII	cluster_09	MFTRYTAVRRTARSIPASNVHGTLTASTPNVAHVAFLPCWRLRNKMRVLESAVWILTALSLPWVVA		WDSSTAELCKENSNGCSVPSHLTPCQEHFRPACDRHDNCYLCGTHFGFTQEDCDYAFFVDMVALCAHGTDDEGYCLEKRKRREASSMSNTTPLRQLRLLEKLMPPNSLLDPDTRQPQQRFFWDDCFDWAENYYNTVWYLGSWYFYDTANATHCPKYQDCMPEIRYPD		72.826	7.25e-102	gi|570999801|gb|JAB84712.1| Conodipine_Vc2 prepropeptide [Conus victoriae]
Ce-0400	1024.92	VI/VII	O2	MEKLTILLLVAAVLMSTLFLA	QGVGEKTQKAKIDLFKARKLSENKQTR	GECVGWSAYCGPWNNPPCCDWYVCEGVYCALDWD		67.949	1.15e-30	sp|Q9BPC2|O266_CONVE Conotoxin VnMEKL-0111 OS=Conus ventricosus OX=117992 PE=2 SV=1
Ce-0412	180.29	V	T	MLCLPVFIILLLLASPAAP	NPFETKLQSDLTRADADMKTDKNLDAVR	KAICCNVYPGTDCCM	G	92.063	6.05e-39	gi|482544170|gb|AGK23242.1| T superfamily conotoxin Ts5.7 precursor [Conus tessulatus]
Ce-0414	321.32	III	M	MMSKLGVLLTICLLLFPLTA	VPLDGDQPADQPAERMQDDISSEQHPFFDPVKR	CCVVCNAGCSGNCCP		100	1.11e-46	gi|326635544|gb|ADZ99315.1| conotoxin Eb3.5 [Conus eburneus]
Ce-0419	4.19	XIV	?	MKFSSCLVLTLLVFVSA	EDVKQEESVHVLTTK	NFDSFIADNEFVLVEFYAPWCGHCKALAPEYAKAAATLEEEESNIKLAKVDATVEQSLASKFDVRGYPTIKFFRKEKPDSPADYNGGRQAVDIVNWLKKKTGPPAKELKKKDDAKSFVEKDEVVVIGFFKDQESAGALAFKKAAAGIDDIPFAITSEDHVFKEYKMDKDGIVLLKKFDEGRNDFEGEFEEEAIVKHVRENQLPLVVEFTQESAQKIFGGEVKNHILLFLKKEGGEDTIEKFRGAAEDFKGKVLFIYLDTDNEENGRITEFFGLKDDEIPAVRLIQLAEDMSKYKPESSDLETATIKKFVQDFLDGKLKPHLMSEDVPDDWDAKPVKVLVGKNFKEVAMDKSKAVFVEFYAPWCGHCKQLAPIWDELGEKYKDSKDVVVAKMDATANEIE…	RTLDAFVKFLESGGKEGAGVPEDEEEEEEDEEGDDEDLPRDEL	40.217	3.48e-14	gi|1790196656|tpg|DAC80631.1| TPA_inf: thioredoxin domain-containing protein 5 [Conus magus]
Ce-0421	87.55	VI/VII	cluster_01	MHTLEMLLLILLLLPLAPG	EGDGRTVGGDRNPSEAHRTYKRRLQRSARRMDRR	ECTPCGPGLCCEPGERCGTSTHHLTYGQPACLNY		83.908	1.31e-41	gi|1004614869|gb|AMP44682.1| conotoxin [Conus betulinus]
Ce-0422	30.44	XXXIII	None		MLIQYTAVHRSAR	SIPVSNVHGTLTASTPNVAHVAFFPCWRLRNKMKILESAVWILAALALPRIAAQDSSTAELCKINSNGCSVPFGWVPCQKHFLAACDRHDTCYSCGSYFKFTQKDCDKAFLTDMAALCAHGTDDEGFCLEKRKRREASSMSITTPLRQLRQLEKLMTPYFLSDRDQRQLDPRFFTCTEWSSNYYRGVRLAGWLHYHKTPEVADCHRFAACMP	KRENE	67.213	4.18e-87	gi|570999801|gb|JAB84712.1| Conodipine_Vc2 prepropeptide [Conus victoriae]
Ce-0424	4.45	XXII	?	MARFLSILLVIAIAVALA	AGILYPDDDR	PIEPCSTNDISKTEVYSTRYDSYVPGYSYCSCASGEVHFEAEDTTSISGPVSHKIYSCGAPTYSCSGGTLPVTDPDDEGRRRMQCTCGQYTYFVRSSWYVRCIPLEQ		46.154	5.58e-32	sp|A0A125S9F9|CXE2_CONIM Conotoxin Im14.2 OS=Conus imperialis OX=35631 PE=1 SV=1
Ce-0426	4.46	III	?	MSYGSKSYPTCLLFTIPCLISFSILSHS		VNRCCVVCNAGCSGNCCP		94.444	1.51e-07	gi|326635544|gb|ADZ99315.1| conotoxin Eb3.5 [Conus eburneus]
Ce-0429	88.02	IX	None		MLLFALGNFVGVQPGQITRDVDNGQLTDNRRNLRSQWKPVR	LFKSLDEPQSCIGSCNVDSDCGFLCGCWNNECFPIVVT		68.919	3.92e-34	gi|1247122891|gb|ATF27494.1| conotoxin [Conus andremenezi]
Ce-0430	3.73	XXXIII	None			MVLGTYHWNVLLYCNLVPCRFIPRTGPQHLCHKRLFFDIFYFSQEIGELPLDEYRNLACAKYVLRTSTSDNFVSEEVQIKSEINFPKRARQISSLKPIGSYVSDLLKESEINRQCIDAQQVVSPYPDWEMNTPHFDINYTDVKKNENPNIMQSEVRFYLENKYPNHFKVYTDGSLLDDHRAGSGFVIPALKKEKLYFIGKNRSIFTAELVAILMALNYIVDLPLNIFQILFCVDSQSVLYALRSFDYKKKSKIIIEINQMINILSLKGTNITFCWVPSHVGLYSNDCADRAAKRGARQDRESIEINIPLSVTEGYNLLEQASWNKVSKSLHRKEKFSGLLLNSVGLTNKTAVNYSNSFKCRHITSLSYRIKLNAFKTKFSKNVKCLCGEQISNQHILLE…		50	3.22e-11	gi|1446202260|gb|AXL95432.1| conotoxin-like precursor unassigned superfamily 17	partial [Conus ermineus]
Ce-0443	11.96	IX	None		MLLFALGNFVGVQPEQITRDVDNGQLTDNRRNLPSQWKPLSLFKSLDER	QSCTGSCNADSDCDSVCDCWKKKCMYFM		68.421	1.39e-35	gi|1247122891|gb|ATF27494.1| conotoxin [Conus andremenezi]
Ce-0447	7.77	XXXIII	None		MFIRYTAVHR	SASSIPVSNVHGTLTASTPNVAHVVFLPCWKLRNKMKMLESAVWILTALSLPWVVAWDSSTAELCKENSNGCSVPSHLTPCQEHFRPACDRHDNCYLCGTHFGFTQEDCDYAFFVDMVALCAHGTDDEGYCLEKRKRREASSMSITTPLRQLRLLEKLMPPNSLLDPDTRQPQQRFFWDDCFDWAENYYNTVWYLGSWYFYDTANATHCPKYQDCMPEIRYPD		73.913	1.17e-103	gi|570999801|gb|JAB84712.1| Conodipine_Vc2 prepropeptide [Conus victoriae]
Ce-0448	3.74	XXXIII	None		MFIRYTAVHRSASSIPVSNVHGTLTASTPNVAHVAFLPYWRLRNK	MKILESAVWILAALALPRIAAQDSSTAELCKINSNGCSVPFEWIPCQKHFLAACDRHDTCYVCGAHFHFTQDDCDNAFFTDMTALCSDKRNRREASSMSITTPLRQQELQEKLMPLNSLSDRDPRQPQERFVACTQCASAYSAATKSVGSWYFYKTANAMYCHKFKACMPEI		69.022	2.19e-89	gi|570999801|gb|JAB84712.1| Conodipine_Vc2 prepropeptide [Conus victoriae]
Ce-0449	10.65	XXXIII	None		MFIRYTAVHRSASSIPVSNVHGTLTASTPNVAHVAFLPYWRLRNK	MKILESAVWILAALALPRIAAQDSSTAELCKINSNGCSVPFEWIPCQKHFLAACDRHDTCYSCGSYFKFTQKDCDKAFLTDMAALCAHGTDDEGFCLEKRKRREASSMSITTPLRQLRQLEKLMTPYFLSDRDQRQLDPRFFTCTEWSSNYYRGVRLAGWLHYHKTPEVADCHRFAACMP	KRENE	67.76	2.73e-87	gi|570999801|gb|JAB84712.1| Conodipine_Vc2 prepropeptide [Conus victoriae]
Ce-0450	103.12	XV	cluster_01	MSTLGMVLLLLLLLLPLGNS	DGDRDRQAMDRDRTASEARSAPRLRLRRHAVHGRSANKR	CSTKICGDDCCSSSACECEVHGGTSNEVGCSCP		89.13	2.79e-46	gi|948542573|gb|ALM87497.1| Conotoxin [Conus betulinus]
Ce-0452	19.96	XV	cluster_01	MSTLGMVLLLLLLLLPLGNS	DGDGDRQAMDRDRTASEARSAPRLRLRRHMDRGRSADKR	CSTITCGGDCCASSECTCTSHGGTGNEVGCSCPVMILL		85.567	1.03e-46	gi|948542573|gb|ALM87497.1| Conotoxin [Conus betulinus]
Ce-0454	22.61	IX	None		MLLFALGNFVGVQPGQITRDVDNGQLTDNRRNLRSWWKPR	NVSKLWWCTGSCRYHTECGYMCYCLWNVC	R	68.056	8e-30	gi|1247122861|gb|ATF27479.1| conotoxin	partial [Conus andremenezi]
Ce-0458	457.03	III	M	MGVVLFIFLVLFPLATLQLDA	DQPVERYAENKQLVSPYERRQIILHALGQR	QCCDWQWCDGACDCCA		98.507	1.27e-46	sp|Q9BH51|CM11_CONTS Conotoxin TsMLKM-011 OS=Conus tessulatus OX=101317 PE=2 SV=1
Ce-0460	13.17	III	?	MGVVLFIFLVLFPLATLHL	EAGQRVERQQDLNVGDTR	GIMMHAMSEGTSLRGCCTGQGCWNVPTCDCCE		86.957	1.28e-41	gi|371933512|gb|AEX60231.1| M superfamily MLKM group conopeptide Ts3-G01 [Conus tessulatus]
Ce-0461	30.48	III	?	MGVVLFIFLVLFPLATLHL	EAGQRVERQQDLNVGDTRGIMRHAISKGTSLR	GCCTGQGCWNVPTCECCDD		87.143	1.01e-42	gi|371933512|gb|AEX60231.1| M superfamily MLKM group conopeptide Ts3-G01 [Conus tessulatus]
Ce-0473	468.84	XIV	cluster_03	MKLSVMFIVFLMLTMPVIDA	GHSRRAANGGEAGVLAGDRAANLMVLLQER	QCPPSCQSCSHC		75.806	1.58e-28	P05662|Pu14.4 precursor|Conus pulicarius|Precursor|conotoxin|L superfamily|||
Ce-0476	938.59	VI/VII	?	MKLTYILIVAVLFLTAWTFIMA	DGSINGPDTAGGWRKLFLKARDEMRNPAASKLNER	ECHEENEFCGIPFIKNGLCCSQLCIFVCLSW		67.816	2.61e-39	sp|Q9BPA1|O1612_CONVE Conotoxin VnMKLT1-021 OS=Conus ventricosus OX=117992 PE=2 SV=1
Ce-0477	845.57	XIV	cluster_03	MKLSVMFIVFLMLTMPVIDA	GHSRRAANGGEAGVLAGDRAANLMALLQER	QCPPSCQSCSNC		77.419	2.73e-29	P05662|Pu14.4 precursor|Conus pulicarius|Precursor|conotoxin|L superfamily|||
Ce-0482	30.38	V	T	MRCLPVFVILLLLIASTPSVDA	RLNTKVDVPLASFHEDANGILQMLWKK	GRSCCPSPTSCCPW	GKRK	94.03	1.01e-42	sp|P0C636|CT51_CONPL Conotoxin Pu5.1 OS=Conus pulicarius OX=93154 PE=2 SV=1
Ce-0486	755.92	XIV	cluster_03	MKLSVMVIVLVLAMAFTPGLL	LHDDNEGKALGRHDRHVRDTLTDERAKR	TKCVSSATCPSPLVCRLGVCDQYNSDM	GR	78.205	1.13e-38	gi|1004614887|gb|AMP44689.1| conotoxin [Conus betulinus]
Ce-0487	2.7	XXXIII	cluster_04	MNALRSSAVLLLVTLFTQLMTLRA		EDPCLQPKEVGRCDGSFDRFFFNPSSGTCEHFIYGGCDANANNFETFEACEAVCHNQCEQPKEPGSCDYEFVKFFFNSQTGACEEFIYGGCNGNRNNFDTLEDCQGTCLAITL		51.923	1.82e-15	gi|1446202746|gb|AXL95675.1| conkunitzin	partial [Conus ermineus]
Ce-0490	13.8	XV	O2	MEKLTILILVAAVLLAIQVLVQS	DGGNPLKGRVKQHAARR	LSALMRGPSQCTTRHQPCDEDEECCPYLECKCFSRPDCQSGYKCKP	R	93.103	2.45e-58	gi|482544090|gb|AGK23202.1| XV conotoxin Vt15a precursor [Conus planorbis]
Ce-0496	228.94	XXVII	cluster_06	MRYHLMLTVILLLTLFTGGDA	GPRRANRLEKHFVNR	DCQSGCVGCQNPAGCCCGNQVCVNNNHCEPSSLWF		73.239	3.95e-28	P08590|Ml27.2 precursor|Conus miliaris|Precursor|conotoxin|G2 superfamily|XXVII||nucleic acid level
Ce-0497	877.99	XXVII	cluster_06	MRSHLLLTVMLLLTLFTGGDA	GPRRANRLEKHFVNR	DCQSGCVGCQNPAGCCCGELVCVNGNHCEPRSLWF		78.182	5.86e-28	P08590|Ml27.2 precursor|Conus miliaris|Precursor|conotoxin|G2 superfamily|XXVII||nucleic acid level
Ce-0498	522.83	VI/VII	O2	MEKLTILLLVAAVLMSTQA	LIQRGGARRRKVHSLSIREPGFEDWR	EGNCTPWLAGCTSHEECCSGNCETYCRAW	R	89.333	1.6e-46	sp|Q9BPB9|O263_CONTS Conotoxin TsMEKL-011 OS=Conus tessulatus OX=101317 PE=2 SV=1
Ce-0504	145.82	VI/VII	?	MKLTYVLIIAVLLLTTCQL	ITTASDARSEREHPDPRSSDQNPKLTKR	CLGSGETCWRDSSCCSFSCTNNVCF		83.333	6.79e-40	sp|Q9BP98|O164B_CONVE Conotoxin VnMKLT2-021 OS=Conus ventricosus OX=117992 PE=2 SV=1
Ce-0506	19.88	XXII	cluster_18	MTRVFIAMFFLLALTEG		CPRLHDHNCENGPNMHYSFTCQTKQRCGIIRKRNGQLTCRLMCKCEPGVDCLHGEDINWDDKTVKIIYCP		83.908	1.39e-54	gi|1004614776|gb|AMP44646.1| conotoxin [Conus betulinus]
Ce-0510	120.31	None	O2	MGKLTILVLVAAALLSTQVMVQG	DGDQPEDRDAVPRDDNPGGTSGKFMNILRRS	GCPWSPWC	G	90.476	2.25e-39	sp|P0C248|COW_CONAA Contryphan-Am OS=Conus amadis OX=198732 PE=1 SV=2
Ce-0514	147.9	None	O2	MEKLTILLLVAAVLMSTQA	LIQEKRPKEKIKFLSKRKTNAER	WWEGECRGWSNGCTQPSDCCSNECDVVVCTCC		82.432	4e-39	sp|Q9BPC7|O263_CONVE Conotoxin VnMEKL-023 OS=Conus ventricosus OX=117992 PE=2 SV=1
Ce-0515	57.23	XIII	cluster_04	MNFLQPLLVLLLVSTITA	LYQDRRATQRRGRNIR	TMSNLLNIQTRECPSGCPVTCPDRNECCSGITCTYTTPGGPYYCIGCGGGGGD		86.42	1.63e-36	gi|948542563|gb|ALM87492.1| Conotoxin [Conus betulinus]
Ce-0518	68.33	VI/VII	O1	MKLTCVLIIAVLFLTACQLITA	DYSRDKQEDPVVRSSDEVQRSEDPKLAKR	CSGFGAVCDPLNHNCCSGECFGFPNFGFCT		71.605	4.57e-41	sp|Q9BP83|O1613_CONAE Conotoxin ArMKLT2-0311 OS=Conus arenatus OX=89451 PE=2 SV=1
Ce-0524	405.79	XXII	None			MAIEDDSCFKSSSGEEACIQLALSTLSVEFLTLVLFTSWLTTQKGNTAVKMHLSLARSAVLMLLLLFALGNFVGVQPGQITRDVDNGQLTDNRRNLRSQWKPVRLFKSLDEPQSCIGSCNVDSDCGFLCGCWNNECFPIVVT		75.824	1.29e-38	gi|570999661|gb|JAB84642.1| P_Vc14.5 prepropeptide [Conus victoriae]
Ce-0526	471.49	III	None		MEQQDSNSEIFMSNTATWTFSIITSQAFPRSDHTTSQTTRNSQPHSHAKSRQPQLREEGGERFVMLKMGVVLFVFLVLFPLATLQLDADQPVERYAENKQLLSPYERRQIILHALGQR	QCCDWQWCDGACDCCA		98.571	2.13e-49	sp|Q9BH51|CM11_CONTS Conotoxin TsMLKM-011 OS=Conus tessulatus OX=101317 PE=2 SV=1
Ce-0529	1303.31	V	T	MRCLPVFVILLLLIASTPSVDA	RLNTKVDVPLASFHENAKGTRQILQKK	GGHCCPGPMSCCPY	G	76.562	6.91e-32	sp|P0C636|CT51_CONPL Conotoxin Pu5.1 OS=Conus pulicarius OX=93154 PE=2 SV=1
Ce-0533	53.47	XIV	?	MKFSSCLVLTLLVFVSA	EDVRQEESVYVLTTK	NFDSFIADNEFVLVEFYAPWCGHCKALAPEYAKAAATLEEEGLNIKLGKVDATVEESLASKFEVRGYPTIKFFRKEKPDSPADYNGGRQAVDIVNWLKKKTGPPAKELKKKDDAKSFVEKDEVVVIGFFKDQESAGALAFKKAAAGIDDIPFAITSEDHVFKEYKMDKDGIVLLKKFDEGRNDFEGEFEEEAIVKHVRENQLPLVVEFTQESAQKIFGGEVKNHILLFLKKEGGEDTIEKFRGAAEDFKGKVLFIYLDTDNEENGRITEFFGLKDDEIPAVRLIQLAEDMSKYKPESSDLETATIKKFVQDFLDGKLKPHLMSEDVPDDWDAKPVKVLVGKNFKEVAMDKSKAVFVEFYAPWCGHCKQLAPIWDELGEKYKDSKDVVVAKMDATANEIE…	RTLDAFVKFLESGGMEGAGVPEDEEEEEEDEEGDDEDLPRDEL	39.13	1.28e-13	gi|1790196656|tpg|DAC80631.1| TPA_inf: thioredoxin domain-containing protein 5 [Conus magus]
Ce-0536	443.82	VI/VII	O3	MSGLGIMVLTLLLLVFMATSHQ	DAGEKQATQRNAVNVRRRR	SIAGRTVTEECDEYCEDLNKNCCGVTNGEPVCATACL	G	94.937	2.55e-53	sp|Q9BP73|O367_CONTS Conotoxin TsMSGL-2 OS=Conus tessulatus OX=101317 PE=2 SV=1
Ce-0544	55.96	VI/VII	O1	MKLTCVLIIAVLFLTACQLITA	DYSRDKQEDPVVRSSDEVQRSEDPKLAKR	CSGFGVDCDPGNHNCCSGECFGFPNFGLCT		74.074	1.41e-42	sp|Q9BP83|O1613_CONAE Conotoxin ArMKLT2-0311 OS=Conus arenatus OX=89451 PE=2 SV=1
Ce-0555	11.34	VI/VII	O1	MKLTCMMIVAVLCLTAWTFVTA	DDSGNGLENLFPKARHEAKNPEVFKLIKR	CLGNGETCDVMSEPFCCSGQCFIVCY		69.737	6.05e-34	gi|1508297606|gb|AYP73030.1| conotoxin precursor protein	partial [Conus amadis]
Ce-0559	5.76	V	cluster_13	MATNLWMTLSMLVMVVMATAVS	DSTPVHETKARSAPWEVRSLAR	QPVSCCLLVLLIEWCCP	G	67.213	2.96e-22	gi|1782804342|gb|QGV13643.1| conopeptide [Conus arenatus]
Ce-0561	9.05	XXII	?	MKMTGTGLVLFSLAVAGVSA		MYSPSDDVVDLTPTNFHSKVINGDELWIVEFYAPWCGHCQSLAPEWKKAASALKGIVKVGAVNADEHNALGGQYGVRGFPTIKFFGLDKFKPQDYQGQRTAQGIVDFSINQAKSVASARLSGKKSGDSKSKSGGSGKAGDPADVVELTDSNFEKEVLEHDGLVMVEFYAPWCGHCKNLAPQWAKAASELKGKVKLCALDATVHTVMANRYGVRGYPTIKAFPAGKKDGEAEDYDGGRTASDIVQWAMEKAAADIPSPDVYEITSGEVLMDNCEGHQLCIISVLPQIYDCQSECRNNYISILKTLGEKF	KKNQWGWLWAEAGAQPALEQSLEVGGFGYPALAAVNTRKMKFSLLRGQFSEKGINEFLRDLSYGKGSTSPLRNAELPKIEAREPWDGKDAELPVEEDIDLSDVDLDDKDEL	35.193	2.32e-34	gi|1790196656|tpg|DAC80631.1| TPA_inf: thioredoxin domain-containing protein 5 [Conus magus]
Ce-0565	106.1	XXXIII	cluster_02	MKIYLCLAILLLASTIVYS	GLLDKIDTASDWRR	QDIWCDQCLCAELRTSRCTNPMLCDTFGCPLGPPCGKGECSCTRFVSGYCARNAECMPGQC		46.465	4.82e-17	gi|1004614884|gb|AMP44688.1| conotoxin [Conus betulinus]
Ce-0569	4.58	XII	cluster_06	MNRMGFFLTLTVAVLLTLLTCTDG	APAEKLEVK	RDCSDDCVTCSSDAPCGCCGNVICHSTGLCQLVSDPYEY		59.701	1.03e-20	gi|1247123541|gb|ATF27819.1| conotoxin [Conus praecellens]
Ce-0572	2964.34	XV	cluster_01	MSTLGMVLLLLLLLLPLGNS	DGDRDRQAMDRDRTASEARSAPRLRLRRHMDRGRSADKR	CSTITCGGDCCASSECTCTSHGGTGNEVGCSCPVMILL		84.536	1.64e-45	gi|948542573|gb|ALM87497.1| Conotoxin [Conus betulinus]
Ce-0578	593.78	III	?	MMSKLGVLLIICLLLFPLTA	VPLDGDQPAERTQIEQHPLFDQKR	RCCRWPCPSRCGMARCCSS		89.552	4.76e-38	gi|371933823|gb|AEX60386.1| M superfamily MMSK group conopeptide Ts3-GMAR04 [Conus tessulatus]
Ce-0580	4.1	VI/VII	O2	MEKLIILLLVAAVLMSTQA	LIQSGVEKRSKKIKSLSKR	KTSAESWWEGECYGWLASCSSPEQCCSLNCENVYCRAW		89.062	5.72e-39	sp|Q9BPC0|O26X_CONTS Conotoxin TsMEKL-03 (Fragment) OS=Conus tessulatus OX=101317 PE=2 SV=1
Ce-0581	7.36	XXII	None			MTIDDDSCFKSNSREEACIQLALSTLSVEFLTLVLFTSWLTTQKGNTAVKMHLSLARSAVLMLLLLFALGNFVGVQPGQITRDVDNGQLTDNRHNLRLRWDLCSGSCTGDSDCETGCDCWGNECSLFI		60.465	1.11e-28	gi|1247122865|gb|ATF27481.1| conotoxin [Conus andremenezi]
Ce-0583	2396.45	III	M	MMSKLGVLLTICLLLFPLTAVRL	DGDQHADRPADRMQDISSEQHPLFDPVKR	CCDWPCTIGCVPCCLP		98.529	6.05e-46	gi|371933563|gb|AEX60256.1| M superfamily MMSK group conopeptide Ts3-VP01 [Conus tessulatus]
Ce-0595	9.5	VI/VII	O1	MKLTCMMIVAVLCLTAWTFATA	DDSGNGLENLFLKARHEMNSKASR	SGNQCRPGGVVCGFPKPGPYCCSGWCFFVCL		81.818	4.92e-44	sp|Q9BPA3|O1610_CONVE Conotoxin VnMKLT1-012 OS=Conus ventricosus OX=117992 PE=2 SV=1
Ce-0598	348.54	VI/VII	O2	MEKLTILLLVAAVLMSTLFLA	QGVGEKTQKAKIDLFKARKLSENKQTR	GECVGWSAYCGPWNNPPCCTGYVCEGVYCALDWD		66.667	5.51e-29	sp|Q9BPC2|O266_CONVE Conotoxin VnMEKL-0111 OS=Conus ventricosus OX=117992 PE=2 SV=1
Ce-0599	52.59	None	O2	MEKLTILLLVAAVLMSTQA	LIQEKRPKEKIKFLSKRKTNAER	WWEGECRGWSNGCTQPSDCCSNDCDVIVCTCC		82.432	2.87e-39	sp|Q9BPC7|O263_CONVE Conotoxin VnMEKL-023 OS=Conus ventricosus OX=117992 PE=2 SV=1
Ce-0600	3.08	VI/VII	O2	MEKLTILLLVAAVLMSTLFLA	QGVGEKTQKAKIDLFKARKLSENKQTR	GECVGWSAYCGPWNNPPCCTGYVCENYYCALDV		67.949	2.45e-30	sp|Q9BPC2|O266_CONVE Conotoxin VnMEKL-0111 OS=Conus ventricosus OX=117992 PE=2 SV=1
Ce-0603	3.5	I	A	MGMRMMFTVYLLVVLATTVVS	FTSDRAPDGRNAAATDGR	NAAAKAFGLITPTVRDGCCSNPACMLNNPNQC	G	83.099	8.52e-37	sp|F2XFS9|CA16_CONEB Omega-conotoxin Eu1.6 OS=Conus eburneus OX=101300 PE=1 SV=1
Ce-0604	2683.01	XXVII	cluster_06	MRYHLMLTVILLLTLFTGGDA	GPRRANRLEKHFVNR	DCQSGCVGCQNPAGCCCGELVCVNGNHCEPRSLWF		73.239	4.04e-28	P08590|Ml27.2 precursor|Conus miliaris|Precursor|conotoxin|G2 superfamily|XXVII||nucleic acid level
Ce-0605	94.73	VI/VII	?	MKLTCVLMVAVLFLTACQL	ITPDSSRDKQEDPVVRSSDKVQRSKHRKLAKR	CSEVGAACDTESNICCSGECFAVAGEPFGLCE		94.521	1.32e-47	gi|444474829|gb|AGE10507.1| conotoxin Bt6.2 [Conus betulinus]
Ce-0607	2.49	XXXIII	None		MLIQYTAVHRSAR	SIPVSNVHGTLTASTPNVAHVAFFPCWRLRNKMKILESAVWILAALALPRIAAQDSSTAELCKINSNGCSVPFGWVPCQKHFLAACDRHDTCYSCGSYFKFTQKDCDKAFLTDMAALCAHGTDDEGFCLEKRKRREASSMSITTPLRQLRQLEKLMTLNSLSDRDQRQLHRRVATCTEWASIYFNTVQLFGSWYFYDRADATYCPQFEACMPEV		77.717	3.96e-105	gi|570999801|gb|JAB84712.1| Conodipine_Vc2 prepropeptide [Conus victoriae]
Ce-0610	244.83	V	T	MLCLPVFIILLLLASPAAP	NPLERRIQSDLIR	AALEDADMKTAKGILSNIMGNLGNIGNVAGSVCCSFYSGCCPE	K	81.579	1.29e-42	sp|Q9BPE3|CT53_CONTS Conotoxin TsMLCL-03 OS=Conus tessulatus OX=101317 PE=3 SV=1
Ce-0614	222.32	VI/VII	H	MNTAGRLLLLCLALGLVFESLG	IPVADDVEADRDTDPEDKDARSFDR	LTTNVKSDCGGVLCTFGCCKTINGERKCREFECS		69.136	3.47e-28	P08094|T6.9 precursor|Conus tulipa|Wild type|conotoxin|H superfamily|VI/VII||nucleic acid level
Ce-0620	17.57	VI/VII	?	MEKLTIVILLAAVLVLAQA	LIKGGGEKRQKEKINFLSKR	KTTAESWWEGECYGWWTSCSSPEQCCSLNCETHCRAW		67.105	3.32e-34	sp|A0A125S9F3|O269_CONIM Conotoxin Im6.9 OS=Conus imperialis OX=35631 PE=1 SV=1
Ce-0625	206.56	VI/VII	cluster_05	MKISWIICLLLIAFMIDDGST	RNTMYSRKGAGIASGIKRFQKSFFRR	SCDNCPEEPCCYGDQCMPDPGHEPFCGN		82.667	1.54e-33	gi|948542557|gb|ALM87489.1| Conotoxin [Conus betulinus]
Ce-0626	324.41	VI/VII	cluster_05	MKISWIICLLLIAFMIDDGST	RNTMYSRKGAGIASGIKRFQKSFFRR	SCDNCPEEPCCHGDKCMPDPGYEPFCGN		81.333	8.18e-35	gi|948542547|gb|ALM87484.1| Conotoxin [Conus betulinus]
Ce-0634	22.16	I	A	MGMRMMFTVFLLVALATTVVS	DRSSNRKNRRASNWNTRR	ALIDCCDIPRCYNEHQEECREESS	G	84.375	1.87e-35	P07670|Ca1.9 precursor|Conus caracteristicus|Precursor|conotoxin|A superfamily|I||nucleic acid level
Ce-0636	177.7	VI/VII	H	MNTAGRLLLLCLALGLVFESLGILVA	DDVEADRDTDPEDKDARSFDR	LTTNVKSDCGGVPCTFGCCKKVNGERKCNEFDCS		72.84	1.92e-29	P08094|T6.9 precursor|Conus tulipa|Wild type|conotoxin|H superfamily|VI/VII||nucleic acid level
Ce-0638	3.25	XV	?	MMEKLAMLLLGATVLLLVQSMVRG	DRGDDQGAWRRVLGLEKR	CKQRGESCDSDSECCEDLSCTCLQASGCSDQTRAKCRTS		37.5	9.93e-13	gi|482544100|gb|AGK23207.1| XV conotoxin S15a precursor [Conus striatus]
Ce-0641	555.75	VI/VII	O3	MSGLGIMVLTLLLLVFMATSHQ	DAGEKQATQRNAVNVRRRR	SIAGRTVTEECDEYCEDLNKNCCGLSNGEPVCATACL	G	97.468	3.49e-54	sp|Q9BP73|O367_CONTS Conotoxin TsMSGL-2 OS=Conus tessulatus OX=101317 PE=2 SV=1
Ce-0644	141.89	XXII	None			MAIEDDSCFKSSSGEEACIQLALSTLSVEFLTLVLFTSWLTTQKGNTAVKMHLSLARSAVLMLLLLFALGNFVGVQPGQITRDVDNGQLTDNRRNLRSQWKTVRLFRSLDKRDSCEGFCNKSSECESVCTCHSNECLFLI		68.235	7.31e-38	gi|1247123357|gb|ATF27727.1| conotoxin [Conus praecellens]
Ce-0645	31.06	I	?	MKPTCMIIAVLFLMACQLITA	DYPRASDLENVAANRR	AYDPIYQAIVLRCCFVDPNCPALC	K	80.645	7.22e-33	gi|1446202152|gb|AXL95378.1| conotoxin precursor superfamily O1 [Conus ermineus]
Ce-0646	4.14	XXII	None			MAIEDDSCFKSSSGEEACIQLALSTLSVEFLTLVLFTSWLTTQKGNTAVKMHLSLARSAVLMLLLLFALGNFVGVQPGQITRDVDNGQLTDNRRNLPSQWKPLSLFKSLDERQSCTGSCNADSDCDSVCDCWKKKCMYFM		71.795	2.05e-38	gi|1247122891|gb|ATF27494.1| conotoxin [Conus andremenezi]
Ce-0648	46.42	VI/VII	H	MNTAGRLLLLCLALGLVFESLG	IPVADDVEADRDTDPEDEDAR	ALDSLTTAEGECGGVLCTFGCCKTINGERKCREFECS		73.75	5.17e-31	gi|1446202540|gb|AXL95572.1| conotoxin precursor superfamily H [Conus ermineus]
Ce-0655	125.75	VI/VII	H	MNTAGRLLLLCLALGLVFESLG	IPVADDVEADRDTDPEDEDAR	ALDSLTTAEGECGGVLCTFGCCRTINGERKCREFECS		75	1.99e-31	gi|1446202540|gb|AXL95572.1| conotoxin precursor superfamily H [Conus ermineus]
Ce-0662	4338.64	III	M	MMSKLGVLLTICLLLFPLTAVS	LDGDQPADQPAERTQNEQHPLYDPKR	GCCQWPCPNRCGIACCV	G	87.5	4.53e-38	sp|H2BKS9|CM3A_CONTS Mu-conotoxin TsIIIA OS=Conus tessulatus OX=101317 PE=3 SV=1
Ce-0664	46.12	XVI	T	MLCLPVFIILLLLASPAAL	NPLERRIQSDLIR	AALEDADMKSEKGIMSMLGKLSKVVNIGDVAGMASSLLCSVCTSCCPE	K	65	1.67e-31	gi|1446202378|gb|AXL95491.1| conotoxin precursor superfamily T [Conus ermineus]
Ce-0667	729.91	III	?	MGVVLFIFLVLFPLATLHLEA	DQPVERQQDLNVGDTR	GIMMHAMSEGTSLRGCCTGQGCWNVPTCDCCE		86.957	1.31e-41	gi|371933512|gb|AEX60231.1| M superfamily MLKM group conopeptide Ts3-G01 [Conus tessulatus]
Ce-0668	8.04	XIV	A	MGMRMMFTVFLLVVLATTVVS	DRASDGRDAAANDKASEVIAR	DDCVPCMRPACGIHFGEC	R	68.75	1.67e-24	gi|218944618|gb|ACL13208.1| conotoxin Pu14.3 [Conus pulicarius]
Ce-0671	128.58	VI/VII	?	MNLACVLIVAVLLLTACQL	TTTVDSRGKLEYLTKRSRAKMQNHKLSKLTKR	CDPPGSGCTFWENECCNTCQLREKEPPVCVV		82.857	7.07e-40	gi|1004615142|gb|AMP44785.1| conotoxin	partial [Conus betulinus]
Ce-0676	1994.75	III	M	MMSKLGVLLTMCLLLFPLTAVRL	DGDQHADRPADRMQDISSEQHPLFDPVKR	CCDWPCTIGCVPCCLP		100	1.83e-46	gi|371933563|gb|AEX60256.1| M superfamily MMSK group conopeptide Ts3-VP01 [Conus tessulatus]
Ce-0677	259.52	XIII	cluster_04	MNCLQPLLVLLLISTITA	FYQDGRATQRSGRNIRTMSNLLNIQRR	ECPTGCPVSCPDRNECCSGITCTYTTPGGPYYCIGCGGGGGD		86.42	7.54e-38	gi|948542563|gb|ALM87492.1| Conotoxin [Conus betulinus]
Ce-0688	1038.44	III	M	MMSKLGVLLIICLLLFPLTAVQL	DGDQPADLPALRTQDIATDHSPWFDPVKR	CCSRYCYICIPCCPN		98.507	3.13e-45	sp|Q9BPI3|M23B_CONTS Conotoxin TsMMSK-011 OS=Conus tessulatus OX=101317 PE=2 SV=1
Ce-0689	86.73	VI/VII	O1	MKLTCVLIVAMLFLMACQLITA	DYSREKQGYPAVRSSDKIQDSDHIMLTKR	CTDNGDACEPGNHNCCSGSCIASEAGDYCAMSVEYEYVSMVS	R	71.277	1.11e-45	gi|1004614936|gb|AMP44709.1| conotoxin [Conus betulinus]
Ce-0696	25.59	III	?	MGVVLFIFLVLFPLATLHLEA	DQPVERQQDLNVGDTRGIMRHAISKGTSFR	GCCTGSACWNVPTCECCDD		88.571	1.24e-43	gi|371933512|gb|AEX60231.1| M superfamily MLKM group conopeptide Ts3-G01 [Conus tessulatus]
Ce-0698	10.64	VI/VII	?	MNLTCALIVAVLFLTTCQL	TTTVDSRGKLEYLTKRSRAKMQNHKLSKLTKR	CDPPGSGCTFWENECCNTCQLREKEPPVCVV		82.857	8.42e-40	gi|1004615142|gb|AMP44785.1| conotoxin	partial [Conus betulinus]
Ce-0708	244.05	XIV	cluster_03	MKLSVMVIVLVLAMAFTPGLL	LHDDNEGKALGRHDRHVRDTLTDKRAKR	TKCVNSSTCPSPLVCRLGVCDQYNSDM	GR	76.923	6.32e-38	gi|1004614887|gb|AMP44689.1| conotoxin [Conus betulinus]
Ce-0713	4.01	VI/VII	O1	MKLTCVVIVAVLFLTACQLITA	DDSRSTQKHRALRSTTKLSKLTR	ECTPYGGVCGIYSNCCGVCNVLQNSCM		83.099	7.6e-39	gi|1446202330|gb|AXL95467.1| conotoxin precursor superfamily O1 [Conus ermineus]
Ce-0714	215.39	XI	?	MMCRLTSLWCLLVIVLLNSAVDG		IPCTGPGGFCHSHMWCCDSRDICCELPGPATCTREDACETLRIAL	GRRAQYKRFFRR	87.654	1.31e-48	sp|C7DQB9|I2B3_CONEB Conotoxin Eb11.3 OS=Conus eburneus OX=101300 PE=3 SV=1
Ce-0715	1343.3	VI/VII	?	MEKLTIVILLAAVLVLAQA	LIKGGGEKRQKEKINFLSKR	KTTAESWWEGECSGWSVYCTWDSECCSGECTRSYCELW		98.701	2.18e-51	gi|452891184|gb|AGG19148.1| conotoxin Bt6.3 [Conus betulinus]
Ce-0718	182.63	XXII	cluster_04	MDALRFSAVLLIVAMACFLTVSA		GICEKAKDEGTGNQNIRSFFFNSATGTCEVFFYKGSGNNDPFPNRFSSNSDCENVCKCKLRMDPGTGERPRTRYYHNTDGSGCLPFQYRGIGGNKNNFDSESKCEMECEL		71.97	1.68e-68	gi|763708650|gb|JAG92870.1| Ctr_75_N conopeptide precursor [Conus tribblei]
Ce-0721	4.88	XXII	?	MARFLSILLGIAMAVALAAG	ILYPDDDRPIR	PCSTNDISKTEVYSTRYDSYVPGYSYCSCASGEVHFEAEDTTSISGPVSHKIYSCGAPTYSCSGGTLPVTDFSAEEPRRMQCTCGQYTYFVRSSWYVRCIPLEQ		45.385	1.2e-29	sp|A0A125S9F9|CXE2_CONIM Conotoxin Im14.2 OS=Conus imperialis OX=35631 PE=1 SV=1
Ce-0722	13.28	VI/VII	O1	MKLTCMMIVAVMFLTAWTFVTA	DDSINGPENRRIWEKLLTKAHDEMKNPEASKR	HCWTPGWFCGLGRHKCCKGCLFFCF		72.289	1.28e-36	sp|Q9BPA0|O1613_CONVE Conotoxin VnMKLT1-022 OS=Conus ventricosus OX=117992 PE=2 SV=1
Ce-0729	7.84	V	cluster_13	MATNLWMTLSILVMVVMATAVS	DSTPFDETKAASVPQEVRSLALQR	SSCCSLSLPMEWCCS	G	65	1.14e-22	gi|1782804342|gb|QGV13643.1| conopeptide [Conus arenatus]
Ce-0730	61.92	XIV	cluster_03	MNFSVMFIVALVLTLSMTDG	FMRPAENGGRTFRQHSPDAKDLQTHQIKTR	DLCPHCPNGCHVDRTCI		82.09	5.53e-40	gi|1004614907|gb|AMP44697.1| conotoxin [Conus betulinus]
Ce-0733	12.67	VIII	cluster_12	MKLFMFAAIIFTMASTTVTA		DQCANNQKVCIWEGADDQNCDCIGNDCQRNDAYKVSVGGAAFYTCQEISAFDECDEGTRSVMDADWTQLNCRCPGDTYTIDDGAVVC	G	68.224	5.15e-49	sp|B0L0Y6|CX8_CONCB Putative conotoxin OS=Conus caracteristicus OX=89440 PE=2 SV=1
Ce-0736	8.31	XII	cluster_17	MMTSSYFLLVALGLLLYVCQSSFG		QEHSCDPDAAPHPQGTCGPQLSERHEELCEKEEYLHGGTDNTRKKRGRASPLRKRRGFLSMLKTRVKRNEAFPLQRAVSGMACECCNNKCTDEEVTEYCPPLTESS	G	74.809	2.56e-61	P06945|Con-ins Q1b precursor |Conus quercinus|Precursor|coninsulin|Insulin superfamily|||nucleic acid level
Ce-0740	27.9	III	M	MMSKLGVLLTICLLLFPLTA	VPLDGDQPADRPAERRQDIATDDHPLFDPVKR	CCHTCYMGCIPCCF		86.364	3.36e-40	gi|371933577|gb|AEX60263.1| M superfamily MMSK group conopeptide Ca3-IP04 [Conus caracteristicus]
Ce-0744	1063.42	V	T	MRCLPVFIILLLLIPSAASVA	QPKTKDDVALASFHDNAKRILQMLWYK	RSCCEVGNATCCPW	GKRK	80	4.41e-27	sp|Q9BPF6|CT03_CONTS Conotoxin Ts-03 OS=Conus tessulatus OX=101317 PE=3 SV=1
Ce-0745	2483.32	III	M	MLKMGVVLFVFLVLFPLATL	QLDADQPVERYAENKQLVSPYERRQIILHALGQR	QCCDWQWCDGACDCCA		100	5.05e-49	sp|Q9BH51|CM11_CONTS Conotoxin TsMLKM-011 OS=Conus tessulatus OX=101317 PE=2 SV=1
Ce-0747	791.06	V	T	MRCLPVFIILLLLIPSAASVA	QPKTKDDVALASFYDNAKR	TLQRHWAKFLCCPEDAWCC		98.305	6.05e-39	sp|Q9BPF6|CT03_CONTS Conotoxin Ts-03 OS=Conus tessulatus OX=101317 PE=3 SV=1
Ce-0749	353.5	I	A	MGMQMMFTVFLLVALATTVVS	DRSSNRKNRRASNWNTRR	ALIDCCDIPRCYNEHQEECREESS	G	82.812	4.97e-35	P07670|Ca1.9 precursor|Conus caracteristicus|Precursor|conotoxin|A superfamily|I||nucleic acid level
Ce-0750	1167.53	III	M	MLKMGVVLFTFLVLFPLATL	QLDADQPVERYAENKQDLNPDERMKFILHALGQR	RCCISPACNDTCYCCQD	R	98.611	2.02e-50	gi|371933170|gb|AEX60060.1| M superfamily MLKM group conopeptide Ts3-Y02 [Conus tessulatus]
Ce-0753	5.87	XIV	cluster_15	MKFATVFSLTLLAFVAC	EKVEREEKVYVLKTK	NFDNFIKENDFVLVEFYAPWCGHCKQLAPVYSEAAGKLMDEGSNIKLAKVDATVEKDLAEKFEVKGFPTIKFFSSGEPVDYTGGRQTSDIINWLKKKTGPPAKEMKTSEEAKTFIDSDEVIVMGFFKDQEGKDAAAFKKIAAEIDDVAFGITSEDSVFKEHKMKKDGVVLFKKFDEGRSDFSGAFEEAAMSKFVKDNRLPLINEFSQETAQKIFSGDVKTHLMLFIKKEGAKDTLDTFKAAAGEFKGKVMFIYLDIAKEENERILEFFGLKAADTPVIRLIQLDEELVKYKPESDSLDKSTMTKFVQDFLDGKLKPHLKSEEVPEDWDAQPVKVLVSKNFKEVAMDKSKAVFVEFYAPWCGHCKELAPIWDQLGEKFKDSKDVIIAKMDSTANELEEVK…	RTLEELTKFVESGGKPEPPKKEEEEEEEDDDKKKDEL	38.889	2.3e-14	gi|1790196656|tpg|DAC80631.1| TPA_inf: thioredoxin domain-containing protein 5 [Conus magus]
Ce-0757	349.86	VI/VII	cluster_06	MRFYMLVAVALLLNSVMS	TDDVSIHQTDAKRQQKK	DDDDNCPSSHPYFCLSLHVDNCCKTQCSSGNRCNSNEYVIME		72.368	1.59e-37	gi|1446202368|gb|AXL95486.1| conotoxin-like precursor unassigned superfamily 01 [Conus ermineus]
Ce-0758	96.04	XXII	None			MAIEDDSCFKSSSGEEACIQLALSTLSVEFLTLVLFTSWLTTQKGNTAVKMHLSLARSAVLMLLLLFALGNFVGVQPGQITRDVDNGQLTDNRRNLRSQWKTVSLFKSLHKRQSCSGSCSDDTDCDSICECFKNQCMFFT		74.667	1.69e-37	gi|1247122891|gb|ATF27494.1| conotoxin [Conus andremenezi]
Ce-0761	20	XXXIII	None		MFIRYTAVHRSAR	SIPVSNVHGTLTASTPNVAHVAFLPCWRLRNKMRVLESAVWILTALSLPWVVAWDSSTAELCKENSNGCSVPFGWVPCQKHFLAACDRHDTCYSCGSYFKFTQKDCDKAFLTDMAALCAHGTDDEGFCLEKRKRREASSMSITTPLRQLRQLEKLMTPYFLSDRDQRQLDPRFFTCTEWSSNYYRGVRLAGWLHYHKTPEVADCHRFAACMP	KRENE	63.934	4.99e-84	gi|570999801|gb|JAB84712.1| Conodipine_Vc2 prepropeptide [Conus victoriae]
Ce-0763	39.04	III	M	MMSKLGVLLTICLLLFPLTAVQL	DGDQPADLPALREQDFAPESSPWFDPVKR	CCSQNCAQCTPCCP		89.394	1.35e-39	gi|371933691|gb|AEX60320.1| M superfamily MMSK group conopeptide Ts3-IP05 [Conus tessulatus]
Ce-0764	217.74	XXXIII	cluster_02	MKIYLCLAILLLASTIVYS	GLLDKIDTERR	QDVYCEACNCAELRTPRCTDPIYCETFDCPFWPSCGKGKCACTRFVSGRCTRYVECMPGQC		48.485	3e-16	gi|1004614884|gb|AMP44688.1| conotoxin [Conus betulinus]
Ce-0767	2688.71	VI/VII	cluster_06	MRFLLFLCIVVLLTSFRETEA	RLPDKAFRQRQSQSIQRTQR	CPWCGSTCCPPHYCQGVTCVYV		87.302	1.01e-36	gi|1004614979|gb|AMP44726.1| conotoxin [Conus betulinus]
Ce-0768	62.12	XXII	?	MLSTCVSAYTLSTSSA		STRCCPVLGLTGSRLVCVVPLESHRALWPGCTLGSPSCLCVPVSSMRLPSSKLCVVPSSSTQDVRRSWCPRSGDSPSGHVRTTSACVLRAT		98.131	1.72e-69	gi|948542607|gb|ALM87514.1| Conotoxin [Conus betulinus]
Ce-0774	92.6	IX	cluster_08	MEGRRLAVVLIVTSCLSALTVGES		EPRPGLCFQPVVVGPCKGSFPHYYYNPALGTCQLFFYGGCGGNENRFVDFNSCLYVCKYPWIENLVD		74.118	3.98e-45	gi|1004614756|gb|AMP44641.1| conotoxin [Conus betulinus]
Ce-0784	461.14	XIII	cluster_04	MNCLQPLLVLLLISTITA	FYQDGRATQRSGRNIRTMSNLLNIQRR	ECPTGCPVSCPDRNECCSGITCTYTTPGGPYYCIGCGGGGGE		87.356	5.73e-38	gi|948542563|gb|ALM87492.1| Conotoxin [Conus betulinus]
Ce-0788	27.85	None	O1	MKLTCMMIVAVLFLTAWTFVTA	DDSINGLENRRIWEKHLTKAHDEMKNPKLSKR	CFPFILCGVA		86.792	9.49e-29	P01894|Sequence 393 from patent US 6762165|Unknown|Patent|conotoxin||||
Ce-0789	121.22	IX	cluster_08	MEGRRLAVVLIVTSCLSALTVGES	EPRPGKLGSFGHSLNSNFLVPHHPFFSLRKSYAR	NVTPPSLLRIAPPPIRSLCFQPVVVGPCKGSFPHYYYNPALGTCQLFFYGGCGGNENRFVDFNSCLYVCKYPWIENLVD		47.407	9.48e-38	gi|1446202262|gb|AXL95433.1| conkunitzin [Conus ermineus]
Ce-0790	2.55	IX	?	MSKVGVVLLIFLVLLSLAAL	QNGDDPRRQRDEKQSPRRDIVRGTLRNYHSQRR	CVNSSPCSECTSEGKTCQVQPGGKGTCGECV		79.31	4.94e-32	gi|1004614851|gb|AMP44675.1| conotoxin [Conus betulinus]
Ce-0795	4447.92	XIV	None		MRPLR	TVPGCEIWKADCSFRACSWNFEWSSTTRCHLQAAISLSFHL		89.13	3.06e-27	gi|920152395|dbj|BAS23841.1| Conotoxin Superfamily T [Conus episcopatus]
Ce-0798	73.13	VI/VII	H	MNTAGRLLLLCLALGLVFESLG	IPVADDVEADRDTDPDDEDTR	DLNPWFVHEETCGSGTCRFGCCETIDGEEKCREFNCD		81.25	1.9e-34	gi|1446202284|gb|AXL95444.1| conotoxin precursor superfamily H [Conus ermineus]
Ce-0804	638.38	XI	I2	MMCRLTSLCCLLVIVLLNSAVDG		IPCTGPGGFCHSHMWCCNSLDICCELPGPATCTREEACETLQDAL	GRRAQYKRFFRR	86.42	4e-47	sp|C7DQB9|I2B3_CONEB Conotoxin Eb11.3 OS=Conus eburneus OX=101300 PE=3 SV=1
Ce-0806	120.72	VI/VII	O1	MKLMCVLIIAVLFLTACQLTTA	ETYSRGKQMHRALRSTDKNSKLTR	DCTPPGGACGGHAHCCSKSCNIMASTCQ		91.304	1e-42	sp|Q9TVU1|O16C_CONAB Conotoxin AbVIC (Fragment) OS=Conus abbreviatus OX=100123 PE=2 SV=1
Ce-0807	558.19	V	T	MHCLPVLVILLLLIASTPSVDA	RPNPKDDVPLASFHGADNAKRFLRTRWDLR	GCCEAGSSCCFV	G	81.538	8.47e-35	sp|P0C637|CT52_CONPL Conotoxin Pu5.2 OS=Conus pulicarius OX=93154 PE=2 SV=1
Ce-0821	3.47	XXXIII	cluster_09	MRVLESAVWILTALSLPWVVA		WDSSTAELCKENSNGCSVPSHLTPCQEHFRPACDRHDNCYLCGTHFGFTQEDCDYAFFVDMIALCHYGTDEEGYCLEKRKRREASSMSNTTPLRQLRLLEKLMPPNSLLDPDTRQPQQRFFWDDCFDWAENYYNTVWYLGSWYFYDTANATHCPKYHACMPEIRYPD		72.283	2.81e-100	gi|570999801|gb|JAB84712.1| Conodipine_Vc2 prepropeptide [Conus victoriae]
Ce-0823	5.5	XXXIII	None		MFIRYTAVHRSASSIPVSNVHGTLTASTPNVAHVAFLPYWRLRNK	MKILESAVWILAALALPRIAAQDSSTAELCKINSNGCSVPFGWVPCQKHFLAACDRHDTCYSCGSYFKFTQKDCDKAFLTDMAALCAHGTDDEGFCLEKRKRREASSMSITTPLRQLRQLEKLMTPYFLSDRDQRQLDPRFFTCTEWSSNYYRGVRLAGWLHYHKTPEVADCHRFAACMP	KRENE	67.213	3.66e-87	gi|570999801|gb|JAB84712.1| Conodipine_Vc2 prepropeptide [Conus victoriae]
Ce-0824	7.62	III	M	MMSKLGVLLTICLLLFPLTAVQL	DGDQPADLPALRTQDIATDHSPWFDPVKR	CCSRYCYICIPCCPN		100	4.63e-46	sp|Q9BPI3|M23B_CONTS Conotoxin TsMMSK-011 OS=Conus tessulatus OX=101317 PE=2 SV=1
Ce-0836	995.32	III	?	MGVVLFIFLVLFPLATLHL	EAGQRVERQQDLNVGDTRGIMRHAISKGTSFR	GCCTGSACWNVPTCECCDD		88.571	1.3e-43	gi|371933512|gb|AEX60231.1| M superfamily MLKM group conopeptide Ts3-G01 [Conus tessulatus]
Ce-0843	61.35	XIV	cluster_07	MTSLQSVTCCCLLWLMLSVQLVTP	GLTGTARLSTHLDARIPSEENMEVL	CPEMCNEGSGGVACSCS	KRRDVVSSSVRRRKRSMV	89.286	2.95e-50	gi|444474809|gb|AGE10497.1| conotoxin Bt14.1 [Conus betulinus]
Ce-0844	30.55	IX	?	MRLSTMHSVILMLFLMFAFDDVDG	DGPGQTARDVDHGKFTRSLLSEGKLARRFMLGGK	RQLCESGSCPDQCGPGCLCNANGFCDDLWI		73.563	1.52e-40	gi|1004614914|gb|AMP44700.1| conotoxin [Conus betulinus]
Ce-0846	32.09	VI/VII	cluster_06	MRFYMLVAVALLLNSVMS	TDDVSIHQTDAKRQQKK	DDDDNCPSSHPYFCLSLHVDNCCKTQCSSGNRCNDEYEIL		71.053	1.99e-35	gi|1446202368|gb|AXL95486.1| conotoxin-like precursor unassigned superfamily 01 [Conus ermineus]
Ce-0854	360.57	IX	cluster_08	MEGRRLAVVLIVTSCLSALTVGES	EPRPDFLVPHHPFFSLRKSYAR	NVTPPSLLRIAPPPIRSLCFQPVVVGPCKGSFPHYYYNPALGTCQLFFYGGCGGNENRFVDFNSCLYVCKYPWIENLVD		52.033	1.51e-39	gi|1446202262|gb|AXL95433.1| conkunitzin [Conus ermineus]
Ce-0857	173.83	VI/VII	O1	MKLTCMMIVAVMFLTAWTFVTA	DDFGNGLENLFPKARHEAKNPEVFKLIKR	CLGNGETCDVMSEPFCCSGQCFIVCY		72	2.84e-34	P01940|Sequence 324 from patent US 6762165|Unknown|Patent|conotoxin||||
Ce-0859	159.45	VI/VII	O1	MKLTCMMIVAVMFLTAWTFVTA	DDSKNALAKLFMKARDEMYNPDATKLDDKR	WCALDGELCIIPVIGSIFCCHGICMIYCV		90.123	3.75e-52	P01946|Sequence 315 from patent US 6762165|Unknown|Patent|conotoxin||||
Ce-0861	68.84	VI/VII	cluster_01	MHTLEMLLLLVLLLMPLAPG	EGDGRAVGGDTNPGEAHRTYKRLLQRSARRMDRR	ECTPCGPGLCCEPGERCGTSTHHLTYGQPACLNY		79.545	4.53e-40	gi|1004614869|gb|AMP44682.1| conotoxin [Conus betulinus]
Ce-0866	47.46	XIV	?	MKFSSCLVLTLLVFVSA	EDVRQEESVYVLTTK	NFDSFIADNEFVLVEFYAPWCGHCKALAPEYAKAAATLEEEESNIKLAKVDATVEQSLASKFDVRGYPTIKFFRKEKPDSPADYNGGRQAVDIVNWLKKKTGPPAKELKKKDDAKSFVEKDEVVVIGFFKDQESAGALAFKKAAAGIDDIPFAITSEDHVFKEYKMDKDGIVLLKKFDEGRNDFEGEFEEEAIVKHVRENQLPLVVEFTQESAQKIFGGEVKNHILLFLKKEGGEDTIEKFRGAAEDFKGKVLFIYLDTDNEENGRITEFFGLKDDEIPAVRLIQLAEDMSKYKPESSDLETATIKKFVQDFLDGKLKPHLMSEDVPDDWDAKPVKVLVGKNFKEVAMDKSKAVFVEFYAPWCGHCKQLAPIWDELGEKYKDSKDVVVAKMDATANEIE…	RTLDAFVKFLESGGMEGAGVPEDEEEEEEDEEGDDEDLPRDEL	40.217	3.48e-14	gi|1790196656|tpg|DAC80631.1| TPA_inf: thioredoxin domain-containing protein 5 [Conus magus]
Ce-0869	333.44	VIII	cluster_16	MTMDMKMTFSGFVLVVFVTTVVG		WPDLPIEVSDNLAHCWLPQFRVCFVVCSELGIEADCFASCTSAIDEEHGSQTNAFDCEIFKICYGRCMILGKSEPHCWKGTASSVTGTLRDRETC		66.949	2.39e-55	gi|948542615|gb|ALM87518.1| Conotoxin [Conus betulinus]
Ce-0870	5.13	IX	?	MSKVGVVLLIFLVLLSLAAL	QNGDDARRQRHEKQSPRRGTMWSTLRNYHSQRR	CVNSSPCSECTSEGKTCQVQPGGKGTCGECV		73.563	7.23e-30	gi|1004614851|gb|AMP44675.1| conotoxin [Conus betulinus]
Ce-0873	4.32	XI	None			MLIMATGIYSSVSCMFAFGNNVFLLIGLFNRVRTCQGMGESCSSNYDCCGSLCCAGASFFNGCVMGIVAC		88.372	4.26e-23	sp|D2DGD7|I3B2_CONPL Conotoxin Pu11.2 OS=Conus pulicarius OX=93154 PE=3 SV=1
Ce-0879	44.84	XXII	None			MAIEDDSCFKSSSGEEACIQLALSTLSVEFLTLVLFTSWLTTQKGNTAVKMHLSLARSAVLMLLLLFALGNFVGVQPGQITRDVDNGQLTDNRRNLRSWWKPRNVSKLWWCTGSCWYHTECGYMCYCLWNVC	R	69.767	8.94e-31	gi|1247122903|gb|ATF27500.1| conotoxin [Conus andremenezi]
Ce-0881	5.83	VI/VII	O1	MKLTCMMIVAVMFLTAWTFVTA	DDSINGLEDRGIWGEPLSKARDEMNPEASKLNKR	CIPNSELCDIPTQCCSGICLVVCMP		69.136	1.68e-35	P03126|Ts6.1 precursor|Conus tessulatus|Precursor|conotoxin|O1 superfamily|||nucleic acid level
Ce-0887	57.61	XIV	cluster_15	MKFATVFSLTLLAYVAC		EEVEQEEKVYVLKATNFDKFINENEFVLVEFYAPWCGACKNLAPVYSEAAGKLMDEGSNIKLAKVDVTVEKDLAEKFNVSGYPTIKFFSSGEPTDYTGGRQTSNFINWLKKKTGPPAKEMKTSEEAKTFIDSDEVIVMGFFKDQEGKDAAAFKKIAAEIDDVAFGITSEDSVFKEHKMKKDGVVLFKKFDEGRSDFSGAFEEAAMSKFVKDNRLPLINEFSQETAQKIFSGDVKTHLMLFIKKEGAKDTLDTFKAAAGEFKGKVMFIYLDIAKEENERILEFFGLKAADTPVIRLIQLDEELVKYKPESDSLDKSTMTKFVQDFLDGKLKPHLKSEEVPEDWDAQPVKVLVSKNFKEVAMDKSKAVFVEFYAPWCGHCKELAPIWDQLGEKFKDSKDVI…	RTLEELTKFVESGGKQEPPKKEEEEEEEDDDKKKDEL	38.776	3.77e-14	gi|1790196656|tpg|DAC80631.1| TPA_inf: thioredoxin domain-containing protein 5 [Conus magus]
Ce-0901	1553.57	XXII	cluster_18	MMTRVFLAMFFLLALTEG		WPHMYDSDCERGPNIEYTCVQNEQCGRIMKRNGVLRCYLRCTCEDGHSCLDGEEIDWDAMSTKFYNCPWP		61.364	6.28e-38	gi|1446202462|gb|AXL95533.1| conotoxin precursor superfamily E [Conus ermineus]
Ce-0903	1906.51	VI/VII	?	MEKLTILLLVAAVLVLAQA	LIKGGGEKRQKEKINFLSKR	KTTAESWWEGECSGWSVYCTWDSECCSGECTRSYCELW		97.403	5.6e-51	gi|452891184|gb|AGG19148.1| conotoxin Bt6.3 [Conus betulinus]
Ce-0906	2.35	VI/VII	cluster_06	MEFPTFVVVLMAAILLTSIVETEA	RTSLRARLRVKKSVPGETLREFPER	VEEACEGTPSSCRGKPNGTACCRYGHCFQGVCYI		73.494	4.03e-43	gi|1004614897|gb|AMP44693.1| conotoxin [Conus betulinus]
Ce-0907	4.64	V	cluster_13	MATNLWMTLSMLVMVVMATAVS	DSTPVHETKARSAPWEVRSLAR	QPVSCCLLVLLSEWCCP	G	67.213	3.77e-22	gi|1782804342|gb|QGV13643.1| conopeptide [Conus arenatus]
Ce-0911	43.85	None	O1	MKLTCVVIVAVLFLTACQLITA		DDSRSTQKHRAVRSTTKRSK		92.683	3.14e-22	gi|1446202332|gb|AXL95468.1| conotoxin precursor superfamily O1 [Conus ermineus]
Ce-0916	48.62	VI/VII	cluster_14	MSRSGVALFAFLLLWSLMTTVQG	GGEGQKMYHDKHRQTVRKLFTLGRKLKR	NDYCQFPSTTGDDCTGTQICCTHPGSTSGECKEANECYREKS	R	74.026	6.31e-38	gi|651219144|gb|AIC77101.1| conotoxin Lp7.1 precursor	partial [Conus leopardus]
Ce-0919	4.59	XVII	cluster_01	MLKATVLILAILLLLPLSTA	QDDEGSQENAAQTEVDISTR	CSGVGDPCGESAGQSCCGILKCVSSQCCRTTDC		77.027	2.47e-33	gi|1004615041|gb|AMP44751.1| conotoxin [Conus betulinus]
Ce-0926	1161.61	XIV	cluster_07	MTAVQSVTCCCLLWLMLSVQLVTS	DLTGTARLSTHLDARIPSEENMEVL	CPEMCNEGSGGVACSCS	KRRDVVSSSVRRRKRSMMV	90.476	7.95e-52	gi|444474809|gb|AGE10497.1| conotoxin Bt14.1 [Conus betulinus]
Ce-0928	101.28	VI/VII	O2	MEKLTILLLVAAVLMSTQA	LMGAGGEKRRKVNFFSKR	KTTAESWWEGECTDWLGGCTSPAECCSGNCDGYCTAW	R	77.333	3.13e-38	sp|Q9BPB9|O263_CONTS Conotoxin TsMEKL-011 OS=Conus tessulatus OX=101317 PE=2 SV=1
Ce-0931	128.77	XIV	cluster_03	MNFSVMFIVALVLTLSMTDG	FMRPAENGGRTFRQHSPDAKDLQTHQIKTR	DLCPHCPNGCHMDKTCI		82.09	2.8e-40	gi|1004614907|gb|AMP44697.1| conotoxin [Conus betulinus]
Ce-0932	38.58	XIV	A	MGMRMMFTVFLLVVLATTVDS	FNSDRASDGR	DAEVISTESDVIVTCEPCMNPACGPNYGKC	R	98.387	2.14e-42	gi|218944615|gb|ACL13207.1| conotoxin Pu14.2 [Conus pulicarius]
Ce-0934	7.71	III	?	MMSKLGVLLTMCLLLFPLTA	VPLDGDQPADRPAERRQDIATDDHPLFDPVKR	CCHTCYMGCIPCCF		84.848	1.01e-39	gi|371933577|gb|AEX60263.1| M superfamily MMSK group conopeptide Ca3-IP04 [Conus caracteristicus]
Ce-0936	370.8	XIV	None		MLDRR	PRMMCPQHLSTVQIMRIESYEHFGTYAVAAKIKLAVLLDDRLKTCICTLDETPANCPWM		100	0.000437	gi|920150912|dbj|BAS23517.1| Conotoxin Superfamily T [Conus episcopatus]
Ce-0938	2.9	XIII	cluster_04	MNCLQLLLVLLLVSTITA	LYQDRRATQRRGRNIR	TMSNLLNIQTRECPSGCPVTCPDRNECCSGITCTYTTPGGPYYCIGCGGGGGD		86.42	4.26e-38	gi|948542563|gb|ALM87492.1| Conotoxin [Conus betulinus]
Ce-0940	11.96	VI/VII	H	MNTAGRLLLLCLALGLVFESLG	IPVADDVEADRDTDPEDKDARSFDR	LTTNVKSDCGGVPCTFGCCKKVNGERKCNEFDCS		74.074	1.99e-30	P08094|T6.9 precursor|Conus tulipa|Wild type|conotoxin|H superfamily|VI/VII||nucleic acid level
Ce-0942	61.06	III	M	MLKMGVVLFVFLVLFPLATL	QLDADQPVERYAENKQGLNPDERMKFILHALGQR	RCCISPACYDTCYCCQD	R	97.222	2.54e-49	gi|371933162|gb|AEX60056.1| M superfamily MLKM group conopeptide Vt3-Y01 [Conus planorbis]
Ce-0947	80.43	XIV	cluster_03	MKLSVMVIVLVLAMAFTPGLL	LHDDNEGKALGRHDRHVRDTLTDKRAKR	TKCVNSSTCPSPLVCRLGVCDQYNSDL	GR	75.641	2.55e-37	gi|1004614887|gb|AMP44689.1| conotoxin [Conus betulinus]
Ce-0949	103.8	XXII	cluster_04	MDALRFSAVLLIVAMACFLTVSA		GICEKAKDEGTGSQNIRSYFFNSATGTCDIFFYKGSGNNDPFPNRFSSNSDCENVCQCKLRMDPGTGERPRTRYYHNTDGSGCLPFQYRGIGGNKNNFDSESKCEMECEL		69.697	6.19e-67	gi|763708650|gb|JAG92870.1| Ctr_75_N conopeptide precursor [Conus tribblei]

## Sheet: Supplementary_Table_S2
SeqID	Ave_Exp	Framework	Superfamily	Signal	Pre	Mature	Post	Blastp_PID	Blastp_Evalue	Blastp_Hit
Ct-0001	2.32	IX	P	MHLSLARSAVLMLLLLFALGNFVGVQP	GQITRDVDNGQLTDNRRNLRSQWKPMSLFKSLDKR	QSCSGSCNVDSDCESLCDCWRNQCFFFT		75.641	1.2e-40	gi|1247122891|gb|ATF27494.1| conotoxin [Conus andremenezi]
Ct-0003	244.19	III	M	MLKMGVLLFTFLVLFPLATL	QLDADQPVERYAENKQGLNPDERMKFILHALGQR	RCCISPACNDTCYCCQD	R	100	6.1e-51	gi|371933174|gb|AEX60062.1| M superfamily MLKM group conopeptide Ts3-Y03 [Conus tessulatus]
Ct-0004	34.49	I	?	MKPTCMIIAVLFLMACQFITA	DYLRASDLENVAANRR	AYDPIYQAIVLRCCFVDPYCPALC	K	82.258	1.69e-33	gi|1446202152|gb|AXL95378.1| conotoxin precursor superfamily O1 [Conus ermineus]
Ct-0005	36.07	None	B1	MQLYTYLYLLVPLVTFHLILGTGTLA		HGGALTERRSADATALKPEPVLLQKSAARSTDDNGKDRLTQMNRMLKKRGNMARGAEEVRESAETLHEISVY		95.918	3.35e-66	gi|326416228|gb|ADZ72979.1| conantokin E1 precursor [Conus eburneus]
Ct-0007	62.96	XIV	None			MRPLQTVPGCEFWKQTVPFARVRGISNGRQQHAATCKLLSLCRFICGTGWPNN		95.238	5.33e-09	gi|920152298|dbj|BAS23796.1| Conotoxin Superfamily T [Conus episcopatus]
Ct-0012	107.2	XXII	cluster_01	MMTLRHVLLFTLLLLPLATIRA		EVYACTYWTSPGWAVQRCRTNFDCVPNCGTHFRCRCQPGANLCPGGAGCFQTS		80.556	6.17e-33	gi|1004614899|gb|AMP44694.1| conotoxin [Conus betulinus]
Ct-0016	177.32	XXII	cluster_01	MMTLKHVLLFTLLLLPLATIRA		EVYACTYWTSPGWAVQRCRTNFDCVPNCGTHFRCRCQPGANLCPGGAGCFQTS		79.167	1.29e-32	gi|1004614899|gb|AMP44694.1| conotoxin [Conus betulinus]
Ct-0017	15.11	VI/VII	cluster_06	MEFPTFVMVLMAAVLLTSILESEA	RTSFRARLKAKKSVPGETLREFPER	VEEACEGTPTSCRGKPNGTICCRYGHCFQGVCYI		75.904	1.08e-43	gi|1004614897|gb|AMP44693.1| conotoxin [Conus betulinus]
Ct-0020	5.8	III	M	MMSKLGVLLTICLLLFPLTA	VPLDGDQPADQPAERTQNEQHPLYDQKR	RCCPFPCPDRCSTLCC	G	86.154	3.36e-37	gi|371933637|gb|AEX60293.1| M superfamily MMSK group conopeptide Tx3-RYL01 [Conus textile]
Ct-0021	25.53	VI/VII	O3	MSGLGIMVLTLLLFVFMATSHQGAG	EKQATQRDAANFRRRR	SITGRADEKCKEECKGQGRKQCCGRRNGQPRCAKTCL	G	71.25	1.5e-34	sp|Q9BP73|O367_CONTS Conotoxin TsMSGL-2 OS=Conus tessulatus OX=101317 PE=2 SV=1
Ct-0026	4.14	None	O2	MGKLTILVLVAAALLSTQVMVQG	DGDQPADRNAEPRDDNPGGASGEFMNVLRRS	GCPWEPWC	G	93.651	2.12e-40	sp|P58786|COW_CONRA Contryphan-R OS=Conus radiatus OX=61198 PE=1 SV=1
Ct-0029	70.71	XXII	cluster_01	MMTLRHVLLFTLLLLPLATIRA		EVYACTYWTSPGWAVKRCQTHSDCVPYCGSHFRCRCQPGANLCPGGAGCFQTS		76.389	4.97e-31	gi|1004614899|gb|AMP44694.1| conotoxin [Conus betulinus]
Ct-0031	13.54	VI/VII	O3	MSGLGIMVLTLLLFVFMATSHQGAG	EKQATQRDAANFRRRR	SITGRADEKCKEECKGQGRKNCCGRTNGQPRCAKICL	G	72.5	2e-35	sp|Q9BP73|O367_CONTS Conotoxin TsMSGL-2 OS=Conus tessulatus OX=101317 PE=2 SV=1
Ct-0035	153.7	IX	?	MHLSLAGSAVLMLLLLFALGNFAGVQS	GQITRDADNGLTMDKRRNLRSLWKSMTLLKSLYKR	SGCGEDCSSDADCPSGCSSCTLNLSKCM		70	1.55e-40	gi|763708462|gb|JAG92776.1| Ctr_68_N conopeptide precursor [Conus tribblei]
Ct-0039	64.08	VI/VII	cluster_05	MKISWIICLLLIAFMIDDGST	RNTMYSRKGAGIASGIKRFQKSFFRR	SCDNCPEEPCCHGDQCMTDPGHEPFCGN		80	1.04e-34	gi|948542547|gb|ALM87484.1| Conotoxin [Conus betulinus]
Ct-0043	6.77	V	cluster_13	MATNLWMTLSMLVMVIIATAVTDS	TPVHETKARSAPWEVRSLAR	QPVSCCLLVLLIEWCCP	G	62.295	3.7e-21	gi|1782804342|gb|QGV13643.1| conopeptide [Conus arenatus]
Ct-0048	1760.43	VI/VII	O1	MKLTCMMIVAVLFLTAWTFVTA	DDSINGLENRDIWGEPLSKARDKMNPEASKLNKR	CLPAGEYCRLSGLECCSGICFVLCFS		67.47	7.49e-36	P06808|Ml6.5 precursor|Conus miliaris|Precursor|conotoxin|O1 superfamily|VI/VII||
Ct-0053	12.53	III	M	MLKMGVLLFTFLVLFPLATL	QLDADQPVERYAENQQDLNPDKR	REIILPALSQGCCPLTFCYPESQCRCCSKP		72.973	5.64e-33	gi|551479239|dbj|BAO02090.1| Mr_precursor_016 [Conus marmoreus]
Ct-0059	10.24	IX	cluster_02	MKIYLCLAILLLASTIVYS	GLLDK	IETESTTDCPFWPSCGGKCACTRFVSGRCTRYEECVPGQC		39.394	1.31e-05	gi|1004614884|gb|AMP44688.1| conotoxin [Conus betulinus]
Ct-0061	465.47	None	O2	MGKLTILVLVAAALLSTQVMVQG	DGDHLADRDAVPRDDNPGGTREKIMNALRRF	GCPPGLWC	G	98.413	4.44e-42	gi|444474861|gb|AGE10523.1| Contryphan conotoxin precursor analog Bt1 [Conus betulinus]
Ct-0063	68.46	XXXIII	None		MFIRYTAVRQIAR	SIPVSNVHGTLTASTPNVAHVAFPPCWRLRNKMKMLESAVWILTALSLPWVVAWDSSTAELCKENSNGCSVPSDLVPCQEHFRPACDRHDNCYLCGTHFGFTQDDCDYAFFVDMVALCAHGTDEDGYCLEKRKRREASSMSNTTPLRQLRLLEKLMPPNSLSDPDPRHPQQRFFWDDCFDWAENYYNTVWNFGSWYFYDTANATHCPQYQDCMPEIRYPD		73.37	7.35e-103	gi|570999801|gb|JAB84712.1| Conodipine_Vc2 prepropeptide [Conus victoriae]
Ct-0067	47.34	XII	None			MNLARCESGFIFLHRLLWTKRCNKHQRTFLHRQKNISRMKPTCMIIAVLFLMACQLITADYPRASDLENVAANRRAYDPIYQAIVLRCCFVDPYCPALC	K	79.032	2.84e-31	gi|1446202152|gb|AXL95378.1| conotoxin precursor superfamily O1 [Conus ermineus]
Ct-0069	7.76	VI/VII	cluster_05	MKISWIICLLLIAFMIDDGST	RNTMYSRKGAGIASGIKRFQKSFFRR	SCNNCPEEPCCYGDQCMPDPGYEPFCGN		78.667	1.23e-33	gi|948542547|gb|ALM87484.1| Conotoxin [Conus betulinus]
Ct-0076	14.56	XXXIII	cluster_04	MDALRSSAVLLLVTLFTQLATVRA		EDPCLQPKVVGSCDGGFDRFFFNPSSGTCEHFIYGGCDANANNFETFEACEAVCHNQCVQPKEPGSCDYEFVKFFFNSQTGACEEFIYGGCNGNRNNFDTLEDCQGTCLAITLPL		53.846	1.66e-15	gi|1446202746|gb|AXL95675.1| conkunitzin	partial [Conus ermineus]
Ct-0077	35.84	None	B1	MQLYTYLYLLVPLVTFHLILGTGTLA		HGGALTERRSADATALKPEPVLLQKSAARSTDDNGKDRLTQRKRMLKKRGNAARDAEEVRESAETLHEISVY		95.918	6.19e-66	gi|326416228|gb|ADZ72979.1| conantokin E1 precursor [Conus eburneus]
Ct-0080	1598.04	III	M	MMSKLGVLLTICLLLFPLTAVRL	DGDQHADRPADRMQDIATEQHPLFDPVKR	CCDWPCTIGCVPCCLP		98.529	7.21e-46	gi|371933613|gb|AEX60281.1| M superfamily MMSK group conopeptide Ts+Ec3-VP01 [Conus tessulatus]
Ct-0082	41.6	V	T	MRCLPVFVILLLLIASTPSVDA	RPQPKDDMPLASFHGNAKR	TLQILWNIRNCCDTDTTCCAW	GKRK	72.727	6.72e-32	gi|920153862|dbj|BAS25036.1| Conotoxin Superfamily T [Conus episcopatus]
Ct-0083	51.28	V	T	MRCLPVFVILLLLIASTPSVDA	RPQPKDDMSMASFHDNAKRILQMLWSK	RSCCEVGNATCCPW	GKRK	74.627	9.95e-32	gi|920153862|dbj|BAS25036.1| Conotoxin Superfamily T [Conus episcopatus]
Ct-0085	2.59	VI/VII	H	MNTAGRLLLLCLALGLVFESLGILVA	DDVEADRDTDPEDEDAR	ALDSLTTAKGECGGVLCTFGCCRTINGERKCREFECS		73.75	2.1e-30	gi|1446202540|gb|AXL95572.1| conotoxin precursor superfamily H [Conus ermineus]
Ct-0086	22.88	XIV	?	MESTSSSSSVVFAVWLRNVWA		VVVVVCVCSILTGCVRILPTSSSRSFWWIHSTRPSDVTPRPTGSATLSTSTARCVA		97.403	1.18e-47	gi|948542619|gb|ALM87520.1| Conotoxin [Conus betulinus]
Ct-0089	25.59	I	A	MGMRMMFTVFLLVVLATTVVS	FTSDRESNHGNRRASKQIPR	GLWVECCADPPCRQNNMEHCPAN		89.062	5.24e-40	gi|1004613979|gb|AMP44588.1| conotoxin [Conus betulinus]
Ct-0091	260.8	VI/VII	cluster_14	MSRSGVALFAFLLLWSLLTTVQG	GGEGQKMYHDKHRQTVRKLFTLGRKLKR	NDYCQFPSTTGDDCTGTQICCIPSGSTSGVCKEANECY		73.864	3.25e-36	gi|948542559|gb|ALM87490.1| Conotoxin [Conus betulinus]
Ct-0103	613.43	VI/VII	?	MKLTCVLIVAVLFLTACPLITA	DYSRDKQEDPVVRSSDKVQRSKHRKLAKR	CSDVGAACDTESNICCSGECFAVQGSTFGLCE		93.151	1.56e-46	gi|444474829|gb|AGE10507.1| conotoxin Bt6.2 [Conus betulinus]
Ct-0107	2538.58	V	T	MLCLPVFIILLLLASPAAP	NPLERRIQSDLIR	AALEDADMKTAKGILSNIMGNLGNIGNMAGSFCCSLYSGCCPE	K	84.211	1.34e-44	sp|Q9BPE3|CT53_CONTS Conotoxin TsMLCL-03 OS=Conus tessulatus OX=101317 PE=3 SV=1
Ct-0111	79.52	XIV	cluster_03	MKLSVMFIVFLMLTMPVIDA	GHSRRAANGGEAGVLAGDRAANLMALLQER	QCPATCSSCTNCT		77.419	8.62e-29	P05662|Pu14.4 precursor|Conus pulicarius|Precursor|conotoxin|L superfamily|||
Ct-0112	25.14	IX	None			MFSPSSTTDCPFWPSCGGKCACTRFVSGRCTRYEECVPGQC		48.649	2.73e-05	gi|1004614884|gb|AMP44688.1| conotoxin [Conus betulinus]
Ct-0113	12.26	VI/VII	H	MNTAGRLLLLCLALGLVFESLG	IPVADDVEVDRDTDPEDEDAR	ALDSLTTAKGECGGVLCTFGCCRTINGERKCREFECS		73.75	5.64e-31	gi|1446202540|gb|AXL95572.1| conotoxin precursor superfamily H [Conus ermineus]
Ct-0124	6.15	VI/VII	?	MKLTGMMIVAVLFLTAWTFITA	DDSINGLENRGIWGEPLSKARDEMNPEVSKLNKR	CIPNSELCDIPTQCCSGICLVICMP		67.901	6.43e-34	P03126|Ts6.1 precursor|Conus tessulatus|Precursor|conotoxin|O1 superfamily|||nucleic acid level
Ct-0126	10.18	VI/VII	?	MKLTGMMIVAVLFLTAWTFITA	DDSINGLENRGIWGEPLSKARDKMNPEASKLNKR	CIPNSELCDIPTQCCSGICLVVCMP		65.476	3.82e-34	P06808|Ml6.5 precursor|Conus miliaris|Precursor|conotoxin|O1 superfamily|VI/VII||
Ct-0130	28.08	VI/VII	?	MKLTYVLIIAVLFMTTCQHITTA	SYARSERKHPDQRSSNQNSKLTKR	CFESGDRCWPGSICCSLSCINSVCL		69.444	4.06e-32	sp|Q9BP96|O1615_CONVE Conotoxin VnMKLT2-0221 OS=Conus ventricosus OX=117992 PE=2 SV=1
Ct-0139	580.74	XXII	cluster_04	MDALRFSAVLLIVTVACFLTVSA		GICEKAKDEGTGNENIRSYFFDSATGTCEIFFYKGSGNNDPFPNRFSRLSDCENVCQCKLRMDPGTGERPRTRYYHNTDGSGCLPFQYLGIGGNKNNFDTESECEMECEL		71.97	1.52e-68	gi|763708650|gb|JAG92870.1| Ctr_75_N conopeptide precursor [Conus tribblei]
Ct-0142	6.64	V	cluster_13	MATSLWMTLSMLVMVVIATAVS		DSTPFDETKAASVPQEVRSLALQHSSCCSLSLPMEWCCP	G	63.934	8.03e-23	gi|1782804342|gb|QGV13643.1| conopeptide [Conus arenatus]
Ct-0143	4.87	V	cluster_13	MATNLWMTLSMLVMVVIATAVS	DSTPFHETKAESDPREVRSLALQR	SFCCSLGLPIEWCCP	G	62.295	6.93e-20	gi|1782804342|gb|QGV13643.1| conopeptide [Conus arenatus]
Ct-0144	5.06	VI/VII	O2	MQKLTILLLVAAVLMSTQA	LIQGGVEQRQKAKIDFSKR	KTTAESWWDGECRTWNAPCRLDSQCCSDNCNHRRCLAW		82.895	8.67e-44	P07721|Ca6.27 precursor|Conus caracteristicus|Precursor|conotoxin|O2 superfamily|VI/VII||nucleic acid level
Ct-0147	7.24	XXXIII	?	MRVFPYCLAAALGVVCLSRVGG	AEPLRSSHEDER	TADDESGDDCVDSNESCADWASSGQCEANPGYMLKNCRLSCKECGEGGYHHTTPFIPGCHDNNGQCVDWAESKQCEENPGYMHFHCKESCGLCSS		75	9.61e-35	sp|P0DUB0|CXE3_CONIM Conotoxin Im14.3 OS=Conus imperialis OX=35631 PE=1 SV=1
Ct-0150	8.95	III	?	MSYGSKSYPTCLLFTIPCLISFSILSHS		VNRCCVVCNAGCSGHCCW		78.947	4.5e-06	gi|326635544|gb|ADZ99315.1| conotoxin Eb3.5 [Conus eburneus]
Ct-0152	202.03	XV	cluster_01	MSTLGMVLLLFLLLLPLGNS	DGDGDRQAMDRDRTASEARSAPRLRLRRHMDRGRSVDKR	CSTITCGGDCCASSECTCTSHGGTGNEVGCSCPVMAILL	K	82.828	4.61e-47	gi|948542573|gb|ALM87497.1| Conotoxin [Conus betulinus]
Ct-0154	5.01	VI/VII	O2	MEKLTILLLVAAVLMSTQA	LIQRGGARRRKVHSLSIREPGFEDWR	EGNCTPWLGGCTSHEECCAGNCETYCRAW	R	90.667	4.05e-47	sp|Q9BPB9|O263_CONTS Conotoxin TsMEKL-011 OS=Conus tessulatus OX=101317 PE=2 SV=1
Ct-0156	37.72	III	?	MGLVLFIFLVLFPLATLQLEA	EQPVERQQDLNVGDTRGIMMHAMSER	TSLHGCCTGQGCWNVPICDCCE		78.261	4.98e-38	gi|1446202354|gb|AXL95479.1| conotoxin precursor superfamily M [Conus ermineus]
Ct-0158	7.54	XV	cluster_01	MSTLGMVLLLFLLLLPLGNS	DGDGDRQAMDRDRIASDERSAPRLRLRRHMDRGRSVDKR	CSTITCGGDCCASSECTCTSHGGTSNEVGCSCPAMILL		78.351	1.22e-42	gi|948542573|gb|ALM87497.1| Conotoxin [Conus betulinus]
Ct-0168	19.29	XII	cluster_06	MNRMGFFLTLTVAVLLTSLICTDG	APAETLEVK	RDCSDDCVTCSADLPCGCCGNVICHDNGVCQLVSDPYEY		61.194	2.74e-21	gi|1247123541|gb|ATF27819.1| conotoxin [Conus praecellens]
Ct-0172	11.79	V	cluster_13	MATNLWMTISMLVMVVMATAVTDS	TPVHETKAGSAPWEVQRIAR	QPVYCCLLVFLIEWCCP	G	60.656	2.31e-20	gi|1782804342|gb|QGV13643.1| conopeptide [Conus arenatus]
Ct-0174	138.4	XIV	cluster_03	MKLSVMVIVLVLAMAFTPGLL	LHDDNEGKALGRHDRHVRDTLTDKRAKR	TKCVNSSTCPSPLVCRQGVCDQYNSDM	GR	75.641	4.61e-37	gi|1004614887|gb|AMP44689.1| conotoxin [Conus betulinus]
Ct-0178	107.5	VIII	cluster_12	MKLFMFAAIIFTMASTTVTA		DQCANNQMVCIWEGAGDQNCDCIDNDCQMDEAHKVSAGGAAFYTCQEISAFDECVEGTRSVMDADWTQLNCRCRSGTYNIDQGAVVC	G	65.421	1.05e-46	sp|B0L0Y6|CX8_CONCB Putative conotoxin OS=Conus caracteristicus OX=89440 PE=2 SV=1
Ct-0181	51.96	VI/VII	cluster_05	MKISWIICLLLIAFMIDDGST	RNTMYSRKGAGIASGIKRFQKSFFRR	SCNNCPEEPCCHGDQCMTDPGHEPFCGN		80	8.64e-35	gi|948542547|gb|ALM87484.1| Conotoxin [Conus betulinus]
Ct-0184	2.53	VI/VII	H	MNTAGRLLLLCLALGLVFESLGILVA	DDVEADRDTDPEDEDARGFDR	LTTVMGECGGVLCTFGCCKTVNGERQCRVFECL		69.136	1.67e-27	P08094|T6.9 precursor|Conus tulipa|Wild type|conotoxin|H superfamily|VI/VII||nucleic acid level
Ct-0185	7.54	XIV	cluster_15	MKFATVFSLTLLAYVAC		EEVEQEEKVYVLKATNFDKFINENEFVLVEFYAPWCGACKNLAPVYSEVAGKLKDEGSNIKLAKVDVTVEKDLAEKFNVSGYPTIKFFSSGKPTDYTGGRQTSNFINWLKKKTGPPAKEVKTSEEAKTFIDSDEVIVMGFFKDQEGKDAAAFKKIAAEIDDIAFGITSEDSVFKEHKMKKDGVVLFKKFDEGRSDFSGDFEEAAMSKFVKDNRLPLINEFTQETAQKIFSGDVQSHLMLFIKKEGAKDTLDTFKAAAGEFKGKVMFIYLDIAKEENERILEFFGLKAADTPVMRLIQLDEDLVKYKPESDCLDKSTMTKFVQDFLDGKLKPHLKSEEVPEDWDAQPVKVLVSKNFKEVAMDKSKAVFVEFYAPWCGHC	KKLAPIWDQLGEKFKDSKDVIIAKMDSTANELEEVKIQGFPTLKYFPKGSDEIVDYDGERTLEELTKFVESGGKPEPPKKKEEEEEEDDDKKKDEL	38.776	3.24e-14	gi|1790196656|tpg|DAC80631.1| TPA_inf: thioredoxin domain-containing protein 5 [Conus magus]
Ct-0187	14.65	XXXIII	cluster_09	MFIRYTAVRRTASSIPVSNVYGTLTASTPNVAHVAFLPCWRLRNKMKILESALWILAALALPRIAA		QDSSTAKLCKINSNGCSVPFEWIPCQKHFLAACDRHDTCYVCGAHFHLTQDDCDNAFFTDMTALCSDKRKRREASSMSNTTPLRQQELQEKLMPLNSLSDRDPRQPQERFVACTQCASAYSAATKSVGSWFFHKTANAMYCPKFKACMPEI		69.565	6.09e-90	gi|570999801|gb|JAB84712.1| Conodipine_Vc2 prepropeptide [Conus victoriae]
Ct-0192	143.08	III	M	MMSKLGVLLTICLLLFPITA	VPLDEDQLAERMQDDDSAAQHPWFDPVKR	CCNECIPGCSGRCC	G	84.375	1.88e-36	gi|610520417|dbj|BAO65662.1| G129_RS_Superfamily_M_precursor_conopeptide [Conus geographus]
Ct-0195	222.63	VI/VII	O1	MKLTCVVIVAVLFLTACQLITA	DDSRSTQKHRAVRSTTKRSKLTR	YCTSPGGACAYPNECCGLCSVIYNKCV		76.389	2.33e-33	gi|570999719|gb|JAB84671.1| Vc6.28 prepropeptide [Conus victoriae]
Ct-0199	7.01	XIV	cluster_15	MKFATVFSLTLLAYVAC		EEVEQEEKVYVLKATNFDKFINENEFVLVEFYAPWCGACKNLAPVYSEVAGKLKDEGSNIKLAKVDVTVEKDLAEKFNVSGYPTIKFFSSGKPTDYTGGRQTSNFINWLKKKTGPPAKEVKTSEEAKTFIDSDEVIVMGFFKDQEGEGAAAFKKVATEIDDVAFGITSEDSVFKEHKMKKDGVVLFKKFDEGRSDFSGDFEEAAMSKFVKDNRLPLINEFTQETAQKIFSGDVKTHLMLFIKKEGAKDTLDTFKAAAGEFKGKVLFIYLDTTKEENEHIMGFFGLKAADAPAMRLIQLGEDLAKYKPESDSLDKSTMTKFVQDFLDGKLKPHLKSEEVPEDWDAQPVKVLVSKNFKEVAMDKSKAVFVEFYAPWCGHC	KKLAPIWDQLGEKFKDSKDVIIAKMDSTANELEEVKIQGFPTLKYFPKGSDEIVDYDGERTLEELTKFVESGGKPEPPKKKEEEEEEDDDKKKDEL	38.776	3.74e-14	gi|1790196656|tpg|DAC80631.1| TPA_inf: thioredoxin domain-containing protein 5 [Conus magus]
Ct-0200	30.83	XIV	cluster_15	MKFATVFSLTLLAYVAC		EEVEQEEKVYVLKATNFDKFINENEFVLVEFYAPWCGACKNLAPVYSEVAGKLKDEGSNIKLAKVDVTVEKDLAEKFNVSGYPTIKFFSSGKPTDYTGGRQTSNFINWLKKKTGPPAKEVKTSEEAKTFIDSDEVIVMGFFKDQEGEGAAAFKKVATEIDDVAFGITSEDSVFKEHKMKKDGVVLFKKFDEGRSDFSGDFEEAAMSKFVKDNRLPLINEFTQETAQKIFSGDVKTHLMLFIKKEGAKDTLDTFKAAAGEFKGKVMFIYLDIAKEENERILEFFGLKAADTPVMRLIQLDEDLVKYKPESDCLDKSTMTKFVQDFLDGKLKPHLKSEEVPEDWDAQPVKVLVSKNFKEVAMDKSKAVFVEFYAPWCGHC	KKLAPIWDQLGEKFKDSKDVIIAKMDSTANELEEVKIQGFPTLKYFPKGSDEIVDYDGERTLEELTKFVESGGKPEPPKKKEEEEEEDDDKKKDEL	38.776	3.58e-14	gi|1790196656|tpg|DAC80631.1| TPA_inf: thioredoxin domain-containing protein 5 [Conus magus]
Ct-0201	8.65	XIV	cluster_15	MKFATVFSLTLLAYVAC		EEVEQEEKVYVLKATNFDKFINENEFVLVEFYAPWCGACKNLAPVYSEVAGKLKDEGSNIKLAKVDVTVEKDLAEKFNVSGYPTIKFFSSGKPTDYTGGRQTSNFINWLKKKTGPPAKEVKTSEEAKTFIDSDEVIVMGFFKDQEGEGAAAFKKVATEIDDVAFGITSEDSVFKEHKMKKDGVVLFKKFDEGRSDFSGDFEEAAMSKFVKDNRLPLINEFSQETAQKLFSGDVQTHLMLFIKKEGAKDTLDTFKAAAGEFKGKVLFIYLDTTKEENEHIMGFFGLKAADAPAMRLIQLGEDLAKYRPESDSLDKSTMTKFVQDFLDGKLKPHLKSEEVPEDWDAQPVKVLVSKNFKEVAMDKSKAVFVEFYAPWCGHC	KKLAPIWDQLGEKFKDSKDVIIAKMDSTANELEEVKIQGFPTLKYFPKGSDEIVDYDGERTLEELTKFVESGGKPEPPKKKEEEEEEDDDKKKDEL	38.776	3.77e-14	gi|1790196656|tpg|DAC80631.1| TPA_inf: thioredoxin domain-containing protein 5 [Conus magus]
Ct-0204	15.86	XIV	cluster_15	MKFATVFSLTLLAYVAC		EEVEQEEKVYVLKATNFDKFINENEFVLVEFYAPWCGACKNLAPVYSEVAGKLKDEGSNIKLAKVDVTVEKDLAEKFNVSGYPTIKFFSSGKPTDYTGGRQTSNFINWLKKKTGPPAKEVKTSEEAKTFIDSDEVIVMGFFKDQEGKDAAAFKKIAAKIEDVAFGITSEDSVFKEHKMKKDGVVLFKKFDEGRSDFSGDFEEAAMSKFVKDNRLPLINEFTQETAQKIFSGDVQSHLMLFIKKEGAKDTLDTFKAAAGEFKGKVLFIYLDTTKEENEHIMGFFGLKAADAPAMRLIQLGEDLAKYKPESDSLDKSTMTKFVQDFLDGKLKPHLKSEEVPEDWDAQPVKVLVSKNFKEVAMDKSKAVFVEFYAPWCGHC	KKLAPIWDQLGEKFKDSKDVIIAKMDSTANELEEVKIQGFPTLKYFPKGSDEIVDYDGERTLEELTKFVESGGKPEPPKKKEEEEEEDDDKKKDEL	38.776	3.36e-14	gi|1790196656|tpg|DAC80631.1| TPA_inf: thioredoxin domain-containing protein 5 [Conus magus]
Ct-0205	83.64	XXII	cluster_01	MMTLKHVLLFTLLLLPLATIRA		EVYACTYWTSPGWAVKRCQTHSDCVPYCGSHFRCRCQPGANLCPGGAGCFQTS		75	1e-30	gi|1004614899|gb|AMP44694.1| conotoxin [Conus betulinus]
Ct-0209	6.01	VI/VII	H	MNTAGRLLLLCLALGLVFESLGILVA	DDVEADRDTDPEDKDARNFDR	LTTNVKADCGGVPCTFGCCKKVNGERKCNEFDCS		72.84	1.05e-29	P08094|T6.9 precursor|Conus tulipa|Wild type|conotoxin|H superfamily|VI/VII||nucleic acid level
Ct-0220	29.84	XIII	cluster_04	MNFLQPLLVLLLISTITA	LYQDGRATQRSGRNIRTMSNLLNIQRR	ECPSGCPVSCPDRNECCSGITCTYITPGGPYYCIGCGGGGGE		87.356	4.17e-37	gi|948542563|gb|ALM87492.1| Conotoxin [Conus betulinus]
Ct-0226	40.93	VI/VII	cluster_01	MHTLEMLLLLVLLLMPVAPG	EGDGRAVGGDTNPGEARRTYKRLLQRPAKRMDRR	ECTPCGPGLCCGPGERCGTSTHHQSYGEPACLNY		78.409	1.56e-40	gi|1004614869|gb|AMP44682.1| conotoxin [Conus betulinus]
Ct-0230	1292.48	VIII	cluster_16	MTMDMKMTFSGFVLVVFVTTVVG		WPDLPIEVSDNLAHCRLPEFRACLLVCWELGIEADCFASCILAIGEEHGPQTNEFDCEIFRTCYGRCMILGKPEHHCWKGTALSVTGKVSNLETC		72.034	1.77e-63	gi|948542615|gb|ALM87518.1| Conotoxin [Conus betulinus]
Ct-0231	146.4	VI/VII	O3	MSGLGIMVLTLLLLVFMATSHQ	DAGEKQATQRDAANFRRRR	SITGRADEKCKEECKGQGRKQCCGRRNGQPRCAKTCL	G	73.75	5.18e-36	sp|Q9BP73|O367_CONTS Conotoxin TsMSGL-2 OS=Conus tessulatus OX=101317 PE=2 SV=1
Ct-0232	9.96	III	?	MMAKLGVLLTICLLLFPLTA	LPLDEDQPADRPAERMQDISYEKHPWFNPVKR	CCDSPCLHCPPPSNCC		97.059	1.29e-45	gi|371933781|gb|AEX60365.1| M superfamily MMSK group conopeptide Ts3-PPPSN01 [Conus tessulatus]
Ct-0233	8.05	VI/VII	O3	MSGLGIMVLTLLLLVFMATSHQ	DAGEKQATQRDAVNVRRRR	SIAGRTVTEECDEYCEDLNKNCCGLSNGEPVCATACL	G	98.734	7.26e-55	sp|Q9BP73|O367_CONTS Conotoxin TsMSGL-2 OS=Conus tessulatus OX=101317 PE=2 SV=1
Ct-0234	16.16	VI/VII	O3	MSGLGIMVLTLLLFVFMATSHQGAG	EKQATQRDAANFRRRR	SITGRADEKCKEECKGQGRKNCCGRTNGQPRCAKTCL	G	72.5	1.34e-35	sp|Q9BP73|O367_CONTS Conotoxin TsMSGL-2 OS=Conus tessulatus OX=101317 PE=2 SV=1
Ct-0238	1150.1	XIV	None		MRPLR	TVPGCEIWKADCSFRACSWNFEWSSSTRCHLQATISLSFHLWNWMI		88.235	2.25e-30	gi|920152395|dbj|BAS23841.1| Conotoxin Superfamily T [Conus episcopatus]
Ct-0239	180.7	IX	cluster_06	MEFRRLVTVALLLTLVIDSAPA	RQTKTRR	VSPREGMENPFPCNSGQCACLPKEGSTTSYQCQSTEASTDDCVDNLCVTEDEW		70.886	7.3e-34	P07740|Ca9.1 precursor|Conus caracteristicus|Precursor|conotoxin||IX||nucleic acid level
Ct-0249	3331.67	XVI	None			MTTNSAAVELPYSGLVAPEQRCFENHIRCRGHFCCVSM	K	84.211	1.15e-06	P05018|Eb2C12|Conus ebraeus|Wild type|unclassified|M superfamily|||nucleic acid level
Ct-0250	133.49	VI/VII	O3	MSGLGIMVLTLLLLVFMATSHQ	DAGEKQATQRNAANFRRRR	SIAGRTVTEECDEYCEDLNKNCCGLSNGEPVCATACL	G	94.937	7.07e-53	sp|Q9BP73|O367_CONTS Conotoxin TsMSGL-2 OS=Conus tessulatus OX=101317 PE=2 SV=1
Ct-0254	6.79	IX	None		MKR	INVTFCWVPSHCGISTNGKVDQAARRAARNIEGTTALNIPLDLSECYTLINKASLNSFKRLLKDTDSQYYHNCIRPNPDIHHKTKLDKLVSPISRVVVSLIHRMRLNSLRTKYSKNVKCVRGEIHSVSHLLLDCPRAKNTVQEAGTNISPDRSTPLTLPKMLNNYAFLSSLCPHSLGSPVGIYL		42.254	1.54e-09	gi|1446202716|gb|AXL95660.1| conotoxin-like precursor unassigned superfamily 17 [Conus ermineus]
Ct-0258	58.07	IX	?	MHLSLAGSAVLMLLLLFALGNFAGVQS	GQITRDADNGLTMDKRRNLRSLWKSMTLLKSLYKR	SGCGEDCSSDADCPSDCSSCTLNLSQCM		68.889	3.94e-40	gi|763708462|gb|JAG92776.1| Ctr_68_N conopeptide precursor [Conus tribblei]
Ct-0260	19.17	XXXIII	cluster_09	MFIRYTAVRRTASSIPVSNVYGTLTASTPNVAHVAFPPCWRLRNKMKILESALWILAALALPRIAA		QDSSTAKLCKINSNGCSVPFEWIPCQKHFLAACDRHDTCYSCGSLFKFTQKDCDKAFLTDMADLCAQGTDDEGFCLEKRKRREASSMSITTPLRQLRQLEKLMTPYSLSDRDQRQLDPRFFTCTEWSSNYYRAVRLAGWWHYHKTPEVADCHRFAACMPKHKNE		67.76	2.11e-86	gi|570999801|gb|JAB84712.1| Conodipine_Vc2 prepropeptide [Conus victoriae]
Ct-0262	3.26	V	T	MLCLPVFIILLLLASPAAP	NPLERRIQSDLIRAALEDADMKTDER	SVEGVISTIKDYAVKVCCSVSLEFCCPTA		87.838	2.58e-43	sp|Q9BPD9|CT54_CONTS Conotoxin TsMLCL-04 OS=Conus tessulatus OX=101317 PE=3 SV=1
Ct-0264	65.45	XIV	None			MTVTTPFFVDMVALCAHGTDEDGYCLEKRKRREASSMSNTTPLRQLRLLEKLMPPNSLSDPDPRHPQQRFFWDDCFDWAENYYNTVWNFGSWYFYDTANATHCPQYQDCMPEIRYPD		72.897	8.5e-56	gi|570999801|gb|JAB84712.1| Conodipine_Vc2 prepropeptide [Conus victoriae]
Ct-0265	11.33	VIII	cluster_11	MLLAYFRPSAFTSPATMRRAVILFSCIVLAVQA		SDVLEFTDSNFESKIKELDVALVEFYAPWCGHCKRLAPEYDAAAKQLKKGDPPVPLVKVDCTAETKTCQEYGVSGYPTLKIFKGGEFAKDYNGPRESKGIISTMLKEAGPASKELEDFKQFEDFIGRETACLVGFFADADSEMAKTFSKLADTHEGDVRFGHTTASAIMDKAKYKDEIVLFRPKAMQNKFEDSAVKFPGDATKKSAIKEFMTQEHLGMCGLRTINNAGDFSKPTFVAFYDVDYVKNPKGSNYWRNRVMKVGKKLRDEGLKVFFGVSNREEHSHELGECGLQDAEGDKPIVCAYDEKNRKFKMEEEFSVDSFEKFVRGVLNGEVEAYLKSEPVPENNDQPVKVAVAKNFDELVNDPEKDVLIEFYAPWCGHCKSLAPKYDELAEKLKDET…	KKYEGGREVNDFIKYLAKEATDELQGFDRKGKKKGGQKQKKKKTEL	35	1.57e-13	gi|1790196656|tpg|DAC80631.1| TPA_inf: thioredoxin domain-containing protein 5 [Conus magus]
Ct-0267	146.06	XII	cluster_17	MARRLGFLIVALGLLLHWSHA		GYEHYCGSRTALQPRLGICGSALADMVGSLCRRRFSREVRENVSQLKKRGSTASLLKTRAERAILRQGIVCECCVNQCSYREFIEYCESA		63.063	1.54e-39	gi|1446202072|gb|AXL95338.1| insulin-related protein [Conus ermineus]
Ct-0269	133.92	XIV	None			MRPLQTVPGCEIWKADCSFRTCSWSFEWSLTTHCQLQTAISLSFCLWNWMV		82.353	3.68e-27	gi|920152395|dbj|BAS23841.1| Conotoxin Superfamily T [Conus episcopatus]
Ct-0273	46.03	XIV	cluster_03	MNLSVMFIVALVLTLSMTDG	FIRPAENGGRAFGQHGPDAKDLQTRQIKTR	DLCPHCPNGCHVDRTCI		77.612	1.05e-37	gi|1004614907|gb|AMP44697.1| conotoxin [Conus betulinus]
Ct-0278	3.77	I	A	MGMRMMFTVFLLVVLATTVVS	FTSDRDPASNHENSEGSNQKR	WYTPDECCKIPDCRIMILELCLAGENGAAVFILRQLPFHLSSE		75	3.1e-40	P07673|Ca1.12 precursor|Conus caracteristicus|Precursor|conotoxin|A superfamily|I||nucleic acid level
Ct-0280	470.64	VI/VII	?	MKLTCVLIVAVLFLTACPLITA	DYSRDKQEDPVVRSSDKVQRSKHRKLAKR	CSEFGAACDTESNICCSGECFAVQGSTFGLCE		93.151	2.27e-46	gi|444474829|gb|AGE10507.1| conotoxin Bt6.2 [Conus betulinus]
Ct-0281	29.38	VI/VII	O1	MKLTCVLIVAMLFLMACQLITA	DYSREKQGYPAVRSSDKIQDSDHIKLTKR	CTDGGDDCEPGNHNCCSGSCIASEAGAYCAMSVEYAFMVS	R	72.826	3.61e-47	gi|1004614936|gb|AMP44709.1| conotoxin [Conus betulinus]
Ct-0282	325.2	I	A	MGMRMMFTVFLLVVLATTVVS	FTSDRESNHGNRRASKQIPR	GLWAECCADPPCRQNNMEHCPAN		90.625	1.18e-40	gi|1004613979|gb|AMP44588.1| conotoxin [Conus betulinus]
Ct-0283	1296.19	XIV	None		MRTLR	TVPGCEIWKADCSFRTCSWNFEWSLTTRCHLQTAISLSFHLWNCMIN		88.462	1.57e-31	gi|920152395|dbj|BAS23841.1| Conotoxin Superfamily T [Conus episcopatus]
Ct-0286	71.32	XIII	cluster_04	MNCLQLLLVLLLVSTITA	LYQDGRATQRRGRTIR	KMSNLLNIQTRECPSGCPVSCPDRNECCSGITCTYITPGGPYYCIGCGGGGGE		83.951	2.39e-37	gi|948542563|gb|ALM87492.1| Conotoxin [Conus betulinus]
Ct-0293	2.76	VI/VII	None		MEKASSWLSVIIEKKDYYPQGVSESTLSLSLPDRLTKR	CTSPGGGCTYWIANCCSRLCMLRKRGGPVCVEEEE		49.123	8.13e-16	gi|1004614964|gb|AMP44720.1| conotoxin [Conus betulinus]
Ct-0295	195.17	XXVII	cluster_06	MRYHLMLTVILLLTLFTGGDA	GPRRANRLEKHFVNR	DCQSGCVGCHNPAGCCCGNQVCVNNNHCEPSSLWF		73.239	2.07e-28	P08590|Ml27.2 precursor|Conus miliaris|Precursor|conotoxin|G2 superfamily|XXVII||nucleic acid level
Ct-0303	436.31	XXXIII	cluster_09	MFTRYRAVRRTARSIPASNVHGTLTASTPNVAHVAFPPCWRLRNKMKMLESAVWILTALSLPWVVA		WDSSTAELCKENSNGCSVPSDLVPCQEHFRPACDRHDNCYLCGTHFGFTQDDCDYAFFVDMIALCHYGTDEEGYCLEKRKRREASSMSNTTPLRQLRLLEKLMPPNSLSDPDPRHPQQRFFWDDCFDWAENYYNTVWNFGSWYFYDTANATHCPQYQDCMPEIRYPD		73.913	1.57e-102	gi|570999801|gb|JAB84712.1| Conodipine_Vc2 prepropeptide [Conus victoriae]
Ct-0305	44.17	XVI	T	MLCLPVFIILLLLASPAAP	NPLERRIQSDLIR	AALEDADMKSEKGILSIMGKLGKVVNIGGIASSILCSVCTSCCSTE		72.152	3.79e-33	sp|Q9BHA6|CT51_CONAE Conotoxin Ar5.1 a OS=Conus arenatus OX=89451 PE=3 SV=1
Ct-0312	35.05	XV	?	MEKLTALMVVAVVLVLIQVKG	QGKQGNSPKDVHKRLRDSFVQRVRR	CQEPSETCNESGECCAPYVCKCTSGSVCNARCSKAPPA		60.256	1.83e-27	gi|1004614366|gb|AMP44617.1| conotoxin [Conus betulinus]
Ct-0314	959.57	VI/VII	cluster_06	MRFLLFLCIVVLLTSFRETEA	RLPDKAFRQRQSQSIQRTQR	CPWCGSTCCAPNYCQGVTCVYV		90	8.21e-37	gi|1446202350|gb|AXL95477.1| conotoxin-like precursor unassigned superfamily 02 [Conus ermineus]
Ct-0315	12.83	XIV	?	MTAHHTAHSCVCFAASGNVRA		DTQLTSEFYQHLISSTNCQLVVFHFFDKMAVSQCRQNYHAECEAGINRQINMELHASYCYQSMAFYFDRDDVALPGFAKFF	RKSSEEEREHAEKLMTFQNQRGGRIVLQDIKKPDRDEWGSGLDAMQVALALEKSVNQSLLDLHEVATSHNDAQMTDFLEGNYLQEQVRSIKELGDYITNLKRVGPGLGEYMFDKETLQE	99.419	3.1e-130	gi|1767129760|gb|QFQ61169.1| Ferritin [Conus magus]
Ct-0323	70.3	XIV	cluster_15	MKFATVFSLTLLAFVAC	EKVEREEKVYVLKTK	NFDNFIKENEFVLVEFYAPWCGHCKQLAPVYSEAAGKLMDEGSNIKLAKVDATVEKDLAEKFEVKGFPTIKFFSSGEPTDYTGGRQTSNFINWLKKKTGPPAKEMKTSEEAKTFIDSDEVIVMGFFKDQEGKDAAAFKKVATEIDDVAFGITSEDSVFKEHKMKKDGVVLFKKFDEGRTDFSGDFEEAPMSKFVKDNRLPLINEFTQETAQKIFSGDVQSHLMLFIKKEGAKDTLDTFKAAAGEFKGKVLFIYLDTTKEENEHIMGFFGLKAADAPAMRLIQLGEDLAKYRPESDSLDKSTMTKFVQDFLDGKLKPHLKSEEVPEDWDAQPVKVLVSKNFKEVAMDKSKAVFVEFYAPWCGHC	KKLAPIWDQLGEKFKDSKDVIIAKMDSTANELEEVKIQSFPTLKYFPKGSDEIVDYDGERTLEELTKFVESGGKPEPPKKKEEEEEEDDDKKKDEL	37.895	3.76e-15	gi|1790196656|tpg|DAC80631.1| TPA_inf: thioredoxin domain-containing protein 5 [Conus magus]
Ct-0324	8.86	V	cluster_13	MATNLWMTLSMLVMVVMATAVS	DSTPFDETKVGSVPR	EVWSHPLPPTFCCSIDFMKEWCCPSSAHGIF		63.934	4.68e-20	gi|1782804342|gb|QGV13643.1| conopeptide [Conus arenatus]
Ct-0327	31.12	XII	cluster_17	MARRLGFLIVALGLLLHWSHA		GYEHYCDSRAPLPPLRGTCGSALADMVGSLCRRRFSREVRENVSQLKKRGSTASLLKTRAERAILPQGIVCECCVNQCSYREFIEYCESA		66.364	4.34e-42	gi|1446202072|gb|AXL95338.1| insulin-related protein [Conus ermineus]
Ct-0329	113.31	VI/VII	O1	MKLTCVLIIAVLFLTACQLTTA	ETYSRGKQMHRALRSTDKNSKLTR	ECTPPEGSCTRHYHCCNLYCNKPANVCLENSSGF		77.5	2.51e-42	sp|Q3YEG7|O165_CONBE Conotoxin Bt6.5 OS=Conus betulinus OX=89764 PE=2 SV=1
Ct-0334	27.3	XI	cluster_10	MKLALTFLLILMVLPLMTG	EKKSGDHERRSVQSLRAVFRDHR	QFDCIDGGELCRVNSNCCSYLCCQKSIGKRCAIQRSVGCDDFRI		77.907	8.3e-49	gi|1446202916|gb|AXL95760.1| conotoxin precursor superfamily I1 [Conus ermineus]
Ct-0338	35.63	XIV	None			MRPLQTVPGCEIWKADCSFRTCSWNFEWSLSTRCHLQATISLSFHLWNCMI		96.078	6.8e-34	gi|920152395|dbj|BAS23841.1| Conotoxin Superfamily T [Conus episcopatus]
Ct-0343	145.13	V	T	MLCLPVFIILLLLASPAAP	NPLERRIQSDLIR	AALEDADMKTEKGVLSGIMSNLGTVGNMVGGFCCTVYSGCCAE	K	96.053	2.86e-50	sp|Q9BPE3|CT53_CONTS Conotoxin TsMLCL-03 OS=Conus tessulatus OX=101317 PE=3 SV=1
Ct-0346	32.5	XIV	None		MPQNSWTPWQSLSFNFEAAGFLISSRAFKKSFRQPPAVSGPFMESSAMMNVQAVKNSTATIIMHVSFILVMFWVKPRKTAEKYEAKFTVQGSGRR	CDTRVTVACFYTLPAVSHRPKSSFHGYDRRNQRQDDHQHYCRHNRRETCLNH	RRDDRRDHHGNGRRDNVRPRQYHSRLSSP	92.593	7.68e-11	gi|551477682|dbj|BAO02224.1| Mr_precursor_150 [Conus marmoreus]
Ct-0350	20.44	VI/VII	O3	MSGLGIMVLTLLLLVFMATSHQ	DAGEKQATQRNAANFRRRR	SITGRADEKCKEECKGQGRKQCCGRRNGQPRCAKTCL	G	72.5	2.51e-35	sp|Q9BP73|O367_CONTS Conotoxin TsMSGL-2 OS=Conus tessulatus OX=101317 PE=2 SV=1
Ct-0351	22.49	XIII	cluster_04	MNFLQLLLVLLLISTITA	LYQDGRATQRSGRNTRTMSNLLNIQRR	KCPSGCPVTCPNGNECCDGISCTYLTPGGTSYCIGCGGGGGD		70.886	4.06e-36	gi|859104830|gb|JAI17772.1| conopeptide precursor	partial [Conus lenavati]
Ct-0354	33.17	XXII	?	MLSTCVSAYTLSTSSA		STRCCPVLGLTGSRLVCVVPLESHRALWPGCTLGSPSCLCVPVSSMRLPSSKLCVVPSSSTQDVRRSWCPRSGDSPSGHVRTTSACVLRAT		98.131	1.72e-69	gi|948542607|gb|ALM87514.1| Conotoxin [Conus betulinus]
Ct-0361	14.5	XVII	cluster_01	MQKAKVLILAILLLLPLSTA	QDDEDIAGSQENAAQREVDITTR	CSGVGDPCDEPAGQLCCGILKCVNSQCCRTTDC		77.922	6.26e-35	gi|1004615041|gb|AMP44751.1| conotoxin [Conus betulinus]
Ct-0362	100.46	None	T	MLCLPVFIILLLLASPAAP		NPLERRIQSDLIRAALEDADMKTEKGILSSIMGALGSIVG		96.61	5.09e-36	sp|Q9BPD7|CT0C_CONTS Conotoxin TsMLCL-02 OS=Conus tessulatus OX=101317 PE=3 SV=1
Ct-0367	2.06	XXV	?	MKLLLSLILLAAVLTVTMA	TDEGEAYAALFPSAKNLEISRR	KPIWCVYCSCRPNADIYCGATSPCCT		27.536	0.000277	gi|1004614941|gb|AMP44711.1| conotoxin [Conus betulinus]
Ct-0370	296.72	V	?	MRSLPVVVILLLLIASAASIDA	QSKTKDDVPLTSPNDNALQQHWNKR	CCPRKLWCCMFP	G	86.441	6.27e-34	sp|P0C641|CT56_CONPL Conotoxin Pu5.6 OS=Conus pulicarius OX=93154 PE=2 SV=1
Ct-0377	275.36	XIV	A	MGMRMMFTVFLLVVLATTVVS	FNSDRASHGRNAAANVKASDLMARVLDIR	CAHSVPGMHPCKCNNTC	R	82.609	2.85e-34	sp|C6ZJQ2|CAE1_CONPL Alpha-conotoxin Pu14.1 OS=Conus pulicarius OX=93154 PE=1 SV=1
Ct-0378	5.26	XV	?	MEKLTILILVAAVLLSIQVLVQS	DGESPLKGRVKQYAAKRLSALMRGPR	QCTTRHQPCDEDEECCPYLECKCFTRPDCQSGYKCKP	R	94.253	2.77e-58	gi|482544090|gb|AGK23202.1| XV conotoxin Vt15a precursor [Conus planorbis]
Ct-0385	2.2	I	?	MGMQMMFTAFLLVVLATTVVS	FTSDRGPASNHENSKGSNPQKR	LTLVECCKIPACRKIVLELCLAGENALNFRLLPYHLSSE		70	5.71e-34	P07673|Ca1.12 precursor|Conus caracteristicus|Precursor|conotoxin|A superfamily|I||nucleic acid level
Ct-0388	33.69	XI	?	MMCRLTSLWCLLVIVLLNSAVDG		FIPCTGPGGFCHSHMWCCNSLDICCELPGPATCTREEACETLQDAL	GRRAQYKRFFRR	88.889	2.01e-51	sp|C7DQB9|I2B3_CONEB Conotoxin Eb11.3 OS=Conus eburneus OX=101300 PE=3 SV=1
Ct-0389	2715.61	None	T	MLCLPVFIILLLLASPAAP		NPLERRIQSDLIRAALEDADMKTEKGILSSIMGTLGKIVGLAP		100	1.61e-39	sp|Q9BPD7|CT0C_CONTS Conotoxin TsMLCL-02 OS=Conus tessulatus OX=101317 PE=3 SV=1
Ct-0393	54.28	XXIII	?	MKFFACLLFSLVVLTMVFNNVDG		ECDPCAGVMGDCGNCCTCYPKT	GRKRADGLRSRMKEPAGERNLLKLLSFH	53.333	1.08e-15	sp|A0A125S9G2|CXN5_CONIM Conotoxin Im23.5 OS=Conus imperialis OX=35631 PE=1 SV=1
Ct-0404	175.31	VIII	cluster_12	MKLFMFAAIIFTMASTTVTA		DQCANNQKVCIWEGAGDQNCDCIDNDCQMDEAHKVSAGGAAFYTCQEISAFDECVEGTRSVMDADWTQLNCRCRSGTYNIDQGAVVC	G	66.355	1.11e-47	sp|B0L0Y6|CX8_CONCB Putative conotoxin OS=Conus caracteristicus OX=89440 PE=2 SV=1
Ct-0408	39.25	VI/VII	cluster_01	MHKLEMLLLILLLLPLAPG	EGDGRAVGGDTNPGEARRTYKRLLQRPAKRMDRR	ECTPCGPGLCCGPGERCGTSTHHQSYGEPACLNY		82.759	2.06e-41	gi|1004614869|gb|AMP44682.1| conotoxin [Conus betulinus]
Ct-0409	12.61	VI/VII	None			MKTTSDFCAVNGVSEGQKMYHDKHRQTVRKLFTLGRKLKRNDYCQFPSTTGDDCTGTQICCIPSGSTSGVCKEANECY		70.588	3.19e-31	gi|948542559|gb|ALM87490.1| Conotoxin [Conus betulinus]
Ct-0410	45.59	VI/VII	O2	MEKLTILLLVAAVLMSTQA	LMGAGGEKRRKVNFFSKR	KTTAESWWEGECTDWLGGCTSPAECCSGNCDGYCTAW	R	77.333	3.13e-38	sp|Q9BPB9|O263_CONTS Conotoxin TsMEKL-011 OS=Conus tessulatus OX=101317 PE=2 SV=1
Ct-0413	15.4	XVI	None			MRGCDFVSTDLTEDTCFHFRSMPWPKLLLNIKASVVYYSLDFFSPFFFLFFFRWIQHAIFVLFADIRVPSRKRSVYLFIVNSNVWFQMLVLLLCCETTMTII		75	3.27e-05	gi|1446202706|gb|AXL95655.1| conotoxin-like precursor unassigned superfamily 21	partial [Conus ermineus]
Ct-0415	44.74	VI/VII	?	MNLTCALIIAVLFLTACQL	TTTDDSTGRQGYRTARARTKMQNDKIFKLTKR	CTPPGGACSKYDNECCNACMLSYPEPPVCIV		81.481	1.19e-46	gi|1004614946|gb|AMP44713.1| conotoxin [Conus betulinus]
Ct-0421	6.32	V	?	MLCLPVFIVLLLLASPAAP	NPFETKLQSDSTRADADMETDKNLDAVR	KAICCDVFPGTDCCM	G	96.825	3.78e-41	gi|482544170|gb|AGK23242.1| T superfamily conotoxin Ts5.7 precursor [Conus tessulatus]
Ct-0425	3.14	VI/VII	O1	MKLTCMMIVAVLFLTAWTFVTT	DDSINGSENRRIWEKLLSKARDEMKNPEASKLNKR	CLPPGEYCGSGLECCSGICFILCLS		70.588	2.48e-41	P06808|Ml6.5 precursor|Conus miliaris|Precursor|conotoxin|O1 superfamily|VI/VII||
Ct-0428	202.38	XI	?	MMCRLTSLWCLLVIVLLNSAVDG		IPCTGPGGFCHSHMWCCNSLDICCELPGPATCTREEACETLQDAL	GRRAQYKRFFRR	87.654	9.99e-49	sp|C7DQB9|I2B3_CONEB Conotoxin Eb11.3 OS=Conus eburneus OX=101300 PE=3 SV=1
Ct-0436	1268.49	VI/VII	cluster_14	MSRSGVALFAFLLLWSLLTTVHG	GGEGQKMYHDKHRQAVRKLFTLGRKLKR	NDYCQFPSTTGDDCTGTQICCIPSGSTSGVCKEANECY		71.591	4.18e-35	gi|948542559|gb|ALM87490.1| Conotoxin [Conus betulinus]
Ct-0437	15.84	VI/VII	?	MKLTGMMIVAVLFLTAWTFITA	DDSINGLENRGIWGEPLSKARDKMNPEASKLNKR	CIPNSELCDIPTQCCSGICLVICMP		64.286	5.92e-34	P06808|Ml6.5 precursor|Conus miliaris|Precursor|conotoxin|O1 superfamily|VI/VII||
Ct-0439	111.44	III	M	MMSKLGVLLTICLLLFPITA	LPLDEDQLAERMQDDDSAAQHPWFDPVKR	CCNECIPGCSGRCC	G	85.938	8.61e-37	gi|610520417|dbj|BAO65662.1| G129_RS_Superfamily_M_precursor_conopeptide [Conus geographus]
Ct-0449	17.64	XVII	cluster_01	MQKAIVLILAILLLLPLSTA	QDDEGSQENAAQREVDISTR	CSGVGDPCDEPAGQLCCGILKCVNSQCCRTTDC		79.73	1.32e-36	gi|1004615041|gb|AMP44751.1| conotoxin [Conus betulinus]
Ct-0450	42.55	VI/VII	cluster_01	MHKLEMLLLILLLLPLAPG	EGDGRAVGGDTNPGEARRTYKRLLQRSAKRMDGR	NCTPCGPGLCCEPGKTCGKSKNHKTYNQPACV		75	4.97e-36	gi|564731450|gb|AHB89644.1| Q-conotoxin peptide precursor	partial [Conus quercinus]
Ct-0455	472.73	III	None		MEQQDSNSEVFMSNTATWTFSIITSQAFPRSDHTTSQTTRNSQPHSHAKSRQPQLREEGGERFVMLKMGVVLFVFLVLFPLATLQLDADQPVERYAENKQGLNPDERMKFILHALGQR	RCCISPACNDSCYCCQ		95.775	4.01e-49	gi|371933162|gb|AEX60056.1| M superfamily MLKM group conopeptide Vt3-Y01 [Conus planorbis]
Ct-0456	15.38	III	M	MLKMGVLLFTFLVLFPLATL	QLDADQPVERYAENKQDLNPDKRREIILPALSQK	CCSLTVCLKALCKCCA		77.143	5.78e-35	gi|570999751|gb|JAB84687.1| M_Vc3.1 prepropeptide [Conus victoriae]
Ct-0459	1226.64	XIV	A	MGMRMMFTVFLLVVLATTVVS	FNSDRASDGRNAAANVKASDLMARVLDR	GCPEVPVPGMHPCVCRKTCV		88.235	2.43e-39	sp|C6ZJQ2|CAE1_CONPL Alpha-conotoxin Pu14.1 OS=Conus pulicarius OX=93154 PE=1 SV=1
Ct-0462	11.65	VI/VII	cluster_06	MEFPTFVMVLMAAVLLTSILETEA	RTSFRARLKAKKFVPGETLREFPER	VEEACEGTPTSCRGKPNGTICCRYGHCFQGVCYI		77.108	1.19e-43	gi|1004614897|gb|AMP44693.1| conotoxin [Conus betulinus]
Ct-0463	14.94	VI/VII	?	MKLTYVLIIAVLFMTTCQHITTA	SYARSEREHPDPRSSDQNPKLTKR	CLGSGETCWRDSSCCSFSCTNNVCF		83.333	3.62e-41	sp|Q9BP98|O164B_CONVE Conotoxin VnMKLT2-021 OS=Conus ventricosus OX=117992 PE=2 SV=1
Ct-0465	184.82	XXXIII	cluster_09	MFIRYTAVRRTASSIPVSNVNGTLTASTPNVAHVAFLPCWRLRNKMKILESALWILAALALPRIAA		QDSSTAKLCKINSNGCSVPFEWIPCQKHFLAACDRHDTCYSCGSLFKFTQKDCDKAFLTDMADLCAQGTDDEGFCLEKRKRREASSMSITTPLRQLRQLEKLMTPYSLSDRDQRQLDPRFFTCTEWSSNYYRAVRLAGWWHYHKTPEVADCHRFAACMPKHKNE		67.76	1.75e-86	gi|570999801|gb|JAB84712.1| Conodipine_Vc2 prepropeptide [Conus victoriae]
Ct-0469	67.27	VI/VII	O3	MSGLGIMVLTLLLFVFMATSHQGAG	EKQATQRDAVNVRRRR	SITGRADEKCKEECKGQGRKNCCGRTNGQPRCAKTCL	G	75	7.34e-37	sp|Q9BP73|O367_CONTS Conotoxin TsMSGL-2 OS=Conus tessulatus OX=101317 PE=2 SV=1
Ct-0472	221.51	XIV	A	MGMRMMFTVFLLVVLATTVVS	FTSDHASDGRNAAANVKASDLMAR	VLGKDCPSVPVPGMHRCQCTNTC	R	85.507	9.37e-39	sp|C6ZJQ2|CAE1_CONPL Alpha-conotoxin Pu14.1 OS=Conus pulicarius OX=93154 PE=1 SV=1
Ct-0473	7.56	None	O2	MGKLTILVLVAAALLSTQVMVQG	DGDQPADRNAEPRDDNPGGASGEFMNVLRRS	GCPWQPWC	G	92.063	7.51e-40	sp|P58786|COW_CONRA Contryphan-R OS=Conus radiatus OX=61198 PE=1 SV=1
Ct-0477	203.05	V	T	MRCLPVFVILLLLIASTPSVDA	QSKTKDDVPLTSPNDNALQQHWNKR	CCPRKLWCCMFP	G	84.746	1.35e-34	sp|P0C641|CT56_CONPL Conotoxin Pu5.6 OS=Conus pulicarius OX=93154 PE=2 SV=1
Ct-0478	357.2	VI/VII	O1	MKLTCVVIVAVLFLTACQLITA	DDSRSTQKHRAVRSTTKLSKLTR	YCTPHGGHCGGMFQHICCGSCNVLTNSC	G	79.452	4.23e-35	gi|1446202330|gb|AXL95467.1| conotoxin precursor superfamily O1 [Conus ermineus]
Ct-0485	30.92	VI/VII	None		MADGSINGPDTAGGWRKLFLKARDEMKNRAASELNKR	CAAFGSFCGLPGLVDCCSGRCFIVCLL		87.302	1.37e-36	sp|M9PQ91|O164_CONBE Delta-conotoxin-like Bt6.4 OS=Conus betulinus OX=89764 PE=3 SV=1
Ct-0486	47.37	XII	cluster_06	MNRMGFFLMLTVAVLLTSLICTDG	APAEKLEVER	DCSDDCVTCSSDAPCGCCGNVICLDNGVCQFVSDPYQYYDYY		54.43	3.29e-22	gi|1247123541|gb|ATF27819.1| conotoxin [Conus praecellens]
Ct-0492	56.65	VI/VII	?	MKLTCVMIVAALFLTACQLSTA	ASYARDKQEYPAVRWSDEMQDAEDLTLAKK	CTDDTQFCNPSSHNCCSGTCIDEGGNGVCAIVPVIV		82.353	6.27e-51	gi|805714108|gb|AKB91365.1| conopeptide Mi027 [Conus miles]
Ct-0495	6.03	XII	cluster_06	MNRMGFFLTLTVAVLLTLLTCTDG	APAEKLEVER	DCSDDCVTCSSDAPCGCCGNVICLDNGLCQLVSDPYEGYDY		60.606	3.44e-21	gi|1247123541|gb|ATF27819.1| conotoxin [Conus praecellens]
Ct-0505	20.63	XIV	cluster_15	MMKFATVFSLTLLAFVAC	EKVEREEKVYVLKTK	NFDNFIKENEFVLVEFYAPWCGHCKQLAPVYSEAAGKLMDEGSNIKLAKVDATVEKDLAEKFEVKGFPTIKFFSSGKPVDYTGGRQTSDIINWLKKKTGPPAKEVKTSEEAKTFIDSDEVIVMGFFKDQEGKDAAAFKKIAAKIEDVAFGITSEDSVFKEHKMKKDGVVLFKKFDEGRTDFSGDFEEAAMSKFVKDNRLPLINEFTQETAQKIFSGDVQSHLMLFVKKEGAKDTLDTFKAAAGEFKGKVMFIYLDIAKEESERILEFFGLKAADTPVMRLIQLGEDLVKYKPGTDCLDKSTMTKFVQDFLDGKLKPHLKSEEVPEDWDAQPVKVLVSKNFKEVAMDKSKAVFVEFYAPWCGHCKELAPIWDQLGEKFKDSKDVIIAKMDSTANELEEVK…	RTLEELTKFVESGGKPEPPKKKEEEEEEDDDKKKDEL	40	8.13e-15	gi|1790196656|tpg|DAC80631.1| TPA_inf: thioredoxin domain-containing protein 5 [Conus magus]
Ct-0506	223.37	XIV	cluster_03	MNFSVVFIVALVLTLSMTDG	FMRPAENGGR	TFRQHSPDAKDLQTHQIKTWHHCHNCPIGCRADHTCIVLE		71.642	7.04e-32	gi|1004614907|gb|AMP44697.1| conotoxin [Conus betulinus]
Ct-0509	13.29	III	?	MMAKLGVLLTVCLLLFPLTA	LPLDEDQPADRPAERMQDISYEKHPWFNPVKR	CCDSPCLHCPPPSNCC		98.529	9.38e-46	gi|371933781|gb|AEX60365.1| M superfamily MMSK group conopeptide Ts3-PPPSN01 [Conus tessulatus]
Ct-0510	2.03	XVII	cluster_01	MQKATVLILAILLLLPLSTA	QDDEGSQENAAQREVDITTR	CSGVGDPCDEPAGQLCCGILKCVNSQCCRTTDC		82.432	1.1e-37	gi|1004615041|gb|AMP44751.1| conotoxin [Conus betulinus]
Ct-0511	17.22	IX	?	MSKVGVVLLIFLVLLSLAAL	QNGDDPRQQRDEKQSPRRGIVRGTLRNYHSQRR	CANGSPCSECTSEGKTCQVQPGGKGTCGECV		71.014	3.41e-30	gi|1790196398|tpg|DAC80582.1| TPA_inf: conotoxin superfamily M [Conus magus]
Ct-0512	87.21	IX	?	MSKVGVVLLIFLVLLSLAAL	QNGDDPRQQRDEKQSPRRGTMWSTLRNYHSQRR	CANGSPCSECTSEGKTCQVQPGGKGTCGECV		71.264	4.26e-28	gi|1004614851|gb|AMP44675.1| conotoxin [Conus betulinus]
Ct-0513	124.96	III	M	MMSKLGVLLTICLLLFPLTAVQL	DGDQPADLPALRTQDIATDHSPWFDPVKR	CCSRYCYICIPCCPN		100	4.63e-46	sp|Q9BPI3|M23B_CONTS Conotoxin TsMMSK-011 OS=Conus tessulatus OX=101317 PE=2 SV=1
Ct-0516	150.21	XIV	cluster_03	MKLSVMVIVLVLAMAFTPGLL	LHDDNEGKALGRHDRHVRDTLTDKRAKR	TKCVTSATCPSPLVCRQGVCDQYNSDM	GR	75.641	3.5e-37	gi|1004614887|gb|AMP44689.1| conotoxin [Conus betulinus]
Ct-0518	105.22	XII	cluster_17	MARRLGFLIVALGLLLHWSHA		GYEHYCGSRTALQPRLGICGSALADMVGSLCRRRFSREVRENVSQLKKRGSTASLLKTRAERAILPQGIVCECCVNQCSYREFIEYCESA		64.545	1.46e-40	gi|1446202072|gb|AXL95338.1| insulin-related protein [Conus ermineus]
Ct-0523	32.7	XI	cluster_10	MKLALTFLLILMVLPLMTG	EKKSGDHERRSVQSLRAVFRDHR	QFDCVDGGEQCRVNSNCCSYLCCQKSIGKRCAIQRSVGCDDFRI		76.744	3.37e-49	gi|1446202916|gb|AXL95760.1| conotoxin precursor superfamily I1 [Conus ermineus]
Ct-0527	11.15	V	cluster_13	MATNLWMTLSMLVMVVMATAVS	DSTPVHETKARSAPWEVQRIAR	QPVYCCLLVFLIEWCCP	G	62.295	8.54e-20	gi|1782804342|gb|QGV13643.1| conopeptide [Conus arenatus]
Ct-0528	5.52	III	M	MMSKLGVLLTICLLLFPLTA	VPLDGDQPADRPAERRQDIATDDHPLFDPVKR	CCHKCYMGCIPCCI		84.848	7.26e-40	gi|371933577|gb|AEX60263.1| M superfamily MMSK group conopeptide Ca3-IP04 [Conus caracteristicus]
Ct-0529	24.35	XIV	None			MLCSHGDLSFDVLSMSMALGSVGVIGIGIFMVTVDGRTWLCPLDGDLTRAGSVTFNNYCSQHWASRLCPLYVGSEPAPLNATEVTQQQCSVSSGELL		61.111	8.08e-08	gi|1446202912|gb|AXL95758.1| conotoxin precursor superfamily W [Conus ermineus]
Ct-0530	6.54	XIII	cluster_04	MNCLQPLLVLLLISTITA	LYQDGRATQRRGRTIR	KMSNLLNIQTRQCPSGCPTTCPDRDECCSGITCTYITEGGPYYCIGCGGGGGE		83.951	3.21e-35	gi|948542563|gb|ALM87492.1| Conotoxin [Conus betulinus]
Ct-0534	79.91	VI/VII	?	MILAGNLTSYFFTVFFGITKIISRMKLTCVLIIAVLFLTACQLIIA	DFSRDKRVHRAERLRDIMQNFRGTR	SCAQLGEPCSSTACCPDLDCVETYSPICLWE		70.13	5.83e-36	gi|444474833|gb|AGE10509.1| conotoxin Bt6.1 [Conus betulinus]
Ct-0537	38.45	XII	cluster_06	MNRMGFFVMLTVAVLLTSLICTDG	APAETLEVK	RDCSDDCVTCSSDAPCGCCGNVICHDNGVCQLVSDPYEY		58.209	1.9e-20	gi|1247123541|gb|ATF27819.1| conotoxin [Conus praecellens]
Ct-0538	6.39	VI/VII	O1	MKLTCMMIVAVLCLTAWTFVTA	DDSGNGLENLFLKARHEMNSKVSR	SGNQCRPGGVVCGFPKPGPYCCSGWCFFVCL		81.818	6.62e-44	sp|Q9BPA3|O1610_CONVE Conotoxin VnMKLT1-012 OS=Conus ventricosus OX=117992 PE=2 SV=1
Ct-0539	3.03	XI	?	MFRLTSLSCFLLVIVFLNLVVLTSA		CYPEGTRCENDFQCCFSECCWGSCSNPCRAP	GRRAKPQEFFRQR	73.913	2.15e-34	sp|P0C258|I2B2_CONSR Kappa-conotoxin-like Sx11.2 OS=Conus striolatus OX=101315 PE=2 SV=1
Ct-0540	3.52	VI/VII	cluster_06	MRFYMLLAVALLLNSVMS	TDDVSIHQTDAKRQQKK	DDDDNCPSSHPYFCLSVHVDNCCKNPCDSGNRCNSNEYVIME		72.368	4.91e-37	gi|1446202368|gb|AXL95486.1| conotoxin-like precursor unassigned superfamily 01 [Conus ermineus]
Ct-0542	2.74	XIV	cluster_07	MQSVQSVTRCCLLVLLLSALCVSHHPLGVS	QPLPLQQVNIER	GIPKDFDPCKQLCVRLNPPDHCQCPEPPDVVEV	KRTELSMAP	61.798	1.71e-16	gi|763708544|gb|JAG92817.1| Ctr_153_T conopeptide precursor [Conus tribblei]
Ct-0544	231.02	None	O2	MGKLTILVLVAAALLSTQVMVQG	DGDHLADRDAVPRDDNPGGASGEFMNVLRRS	GCPWEPWC	G	90.476	1.04e-38	sp|P58786|COW_CONRA Contryphan-R OS=Conus radiatus OX=61198 PE=1 SV=1
Ct-0547	21.01	IX	?	MHLSLAGSAVLMLLLLFALGNFAGVQS	GQITRDADNGLTMDKRRNLRSLWKSMTLLKSLYKR	SGCGEDCSSNADCPIGCPYCTLNLSKCM		68.889	6.68e-39	gi|763708462|gb|JAG92776.1| Ctr_68_N conopeptide precursor [Conus tribblei]
Ct-0566	21.15	VI/VII	O1	MKLTCMMIVAVLFLTAWTFVTA	DDPRDGPDIAEGWQNFFSKAHDEMKNRAASELNKR	CVPFGEVCGVVECCSGRCLVICMP		71.429	6.87e-40	sp|M9PQ91|O164_CONBE Delta-conotoxin-like Bt6.4 OS=Conus betulinus OX=89764 PE=3 SV=1
Ct-0573	3.09	V	?	MRCLPVFVILLLLIASAASIDA	QSKTKDDVPLTSPNDNALQQHWNKR	CCPRKIWCCMFP	G	91.525	2.19e-36	sp|P0C641|CT56_CONPL Conotoxin Pu5.6 OS=Conus pulicarius OX=93154 PE=2 SV=1
Ct-0578	2071.83	XIV	cluster_03	MKLSVMVIVLVLAMAFTPGLL	LHDDNEGKALGRHDRHVRDTLTDERAKR	TKCVNSSTCPSPLVCRQGVCDQYNSDM	GR	76.923	8.31e-38	gi|1004614887|gb|AMP44689.1| conotoxin [Conus betulinus]
Ct-0580	11.27	VI/VII	None		MLFYLISR	TRSNCIGMSSYCGKWNHPPCCKGHTCENYYCALDW		58.333	6.35e-10	sp|Q9BPC4|O266B_CONVE Conotoxin VnMEKL-0111 OS=Conus ventricosus OX=117992 PE=2 SV=1
Ct-0584	548.55	V	?	MRSLPVVVILLLLIASAASIDA	QSKTKDDVPLTSPNDNALQQHWNKR	CCPRKIWCCMFP	G	88.136	2.49e-34	sp|P0C641|CT56_CONPL Conotoxin Pu5.6 OS=Conus pulicarius OX=93154 PE=2 SV=1
Ct-0590	4.89	VI/VII	None		MATSHQDAGEKQATQRNAVNVRRRR	SMAGRAKTEKCNLDCGAKKCCVVGGHPQCANVCL	G	66.667	3.16e-22	sp|Q9BP73|O367_CONTS Conotoxin TsMSGL-2 OS=Conus tessulatus OX=101317 PE=2 SV=1
Ct-0591	2.07	IX	P	MHLSLARSAVLMLLLLFALGNFVGVQP	GQITRDVDNGQLTDNRRNLRSQWKTLSLFKSLHKR	QSCSGSCSDDTDCDSICECYKNQCMHFTQTD		75.325	3.4e-39	gi|1247122891|gb|ATF27494.1| conotoxin [Conus andremenezi]
Ct-0593	201.45	I	A	MGMRMMFTVFLLVVLATTVVS	FTSDHASDSRNAADNKAYDLLAMTVR	GGCCSYPPCMNNNPWCG	GRR	78.333	4.58e-29	gi|1004615066|gb|AMP44757.1| conotoxin	partial [Conus betulinus]
Ct-0601	558.39	III	M	MMSKLGVLLTICLLLFPLTA	VPLDGDQPADQPAERMQNEQHPLFDQKR	RCCRWPCPSRCGMARCCSS		100	3.59e-46	gi|371933823|gb|AEX60386.1| M superfamily MMSK group conopeptide Ts3-GMAR04 [Conus tessulatus]
Ct-0602	34.75	XXXIII	cluster_09	MKMLESAVWILTALSLPWVVA		WDSSTAELCKENSNGCSVPSDLVPCQEHFRPACDRHDNCYLCGTHFGFTQDDCDYAFFVDMIALCHYGTDEEGYCLEKRKRREASSMSNTTPLRQLRQLEKLMTPYSLSDRDQRQLDPRFFTCTEWSSNYYRAVRLAGWWHYHKTPEVADCHRFAACMPKQ		63.388	7.41e-82	gi|570999801|gb|JAB84712.1| Conodipine_Vc2 prepropeptide [Conus victoriae]
Ct-0603	36.54	XXXIII	cluster_09	MFIRYTAVRRTASSIPVSNVHGTLTASTPNVAHVAFLPCWRLRNKMKILESALWILAALALPRIAA		QDSSTAKLCKINSNGCSVPFEWIPCQKHFLAACDRHDTCYSCGSLFKFTQKDCDKAFLTDMADLCAQGTDDEGFCLEKRKRREASSMSNTTPLRQLRLLEKLMPPNSLSDPDPRHPQQRFFWDDCFDWAENYYNTVWNFGSWYFYDTANATHCPQYQDCMPEIRYPD		78.261	1.89e-106	gi|570999801|gb|JAB84712.1| Conodipine_Vc2 prepropeptide [Conus victoriae]
Ct-0604	218.64	VI/VII	O1	MKLTCMMIVAVLFLTAWTFVTA	DDSINGLENRDIWGEPLSKARDKMNPEASKLNKR	CLPDGEYCGVSSECCSGTCLIVCSPRSLRLLSVLPGLTFDWRVPFTGYKPL		68.675	3.13e-35	P06808|Ml6.5 precursor|Conus miliaris|Precursor|conotoxin|O1 superfamily|VI/VII||
Ct-0605	11.77	VI/VII	O3	MSGLGIMLLTLLLLVFMATSHQ	DAGEKQATQRNAVNVRRRR	SIAGRTVTEECDEYCEDLNKNCCGLSNGEPVCATACL	G	96.203	1.36e-53	sp|Q9BP73|O367_CONTS Conotoxin TsMSGL-2 OS=Conus tessulatus OX=101317 PE=2 SV=1
Ct-0607	10.18	V	?	MLCLPIFLILLLSLSSAAG	FSVESELQRDLALQSPKDFGMRTDHLLLKK	VGDDCCVDGHIGTCC	KK	72.308	7.54e-30	gi|1004614450|gb|AMP44631.1| conotoxin [Conus betulinus]
Ct-0608	70.32	VI/VII	?	MKMTCMMIVAVLCLTAWTFATA	DDSGNGLENLFLKARHEMNSKVSR	SGNQCRPGGVVCGFPKPGPYCCSGWCFFVCL		79.221	5.1e-43	sp|Q9BPA3|O1610_CONVE Conotoxin VnMKLT1-012 OS=Conus ventricosus OX=117992 PE=2 SV=1
Ct-0611	7.81	XIV	None		MADQVKK	CLQVENMDQFEEFLKNAGDKLVVVDFYADWCGPCKMIAPKLEEMAKELKDTVIFLKVNVDDCDDIAAKHEIEAMPTFKFFKN	GKKVHDFVGANDTKLREQILKNMNEQVKS	31.683	6.14e-09	gi|1790196656|tpg|DAC80631.1| TPA_inf: thioredoxin domain-containing protein 5 [Conus magus]
Ct-0621	19.08	III	?	MMSKLGVLLTMCLLLFPLTA	VPLDGDQPADRPAERRQDIATDDHPLFDPVKR	CCHKCYMGCIPCCI		83.333	2.27e-39	gi|371933577|gb|AEX60263.1| M superfamily MMSK group conopeptide Ca3-IP04 [Conus caracteristicus]
Ct-0623	21.73	VI/VII	?	MMKLTCMMIVAVMFLNAWTFATA	VDSKHALAKLFMKARDEMYDPDATKLDDKR	WCALDGELCIIPVIGSIFCCHGICMIYCV		93.827	5.56e-55	P01946|Sequence 315 from patent US 6762165|Unknown|Patent|conotoxin||||
Ct-0626	6.3	IX	cluster_08	MEGRRFAAVLVLTICLLALGDG	ASRR	QGLCSLPAVTGPCLAYMPRFYFDWDSKLCKVFIYGGCQGNDNNFHSSTDCYDTCWFE		65.06	9.99e-34	gi|1004614759|gb|AMP44642.1| conotoxin [Conus betulinus]
Ct-0628	14.36	XIII	cluster_04	MNFLQSLLVLLLISTITA	LYQDGRATQRSGRNTRTMSNLLNIQRR	ECPYGCPVTCPNGNECCDGISCTYLTPGGTSYCIGCGGGGGE		74.684	2.39e-38	gi|859104830|gb|JAI17772.1| conopeptide precursor	partial [Conus lenavati]
Ct-0630	11.13	XIV	cluster_07	MTAVQSVTCCCLLWLMLSVQLVTS	DLTGTARLSRRLDAR	VPSETNMELLCPELCEEGNGGIFCTCS	KRRDVVSSSIRRRKRSMMV	76.19	2.27e-44	gi|444474809|gb|AGE10497.1| conotoxin Bt14.1 [Conus betulinus]
Ct-0631	10.72	XIV	cluster_07	MTAVQSVTCCCLLWLMLSVQLVTS	DLTGTARLSRHLDARIPSEENMEVL	CPEMCNEGSGGVACSCS	KRRDVVSSSVRRRKRSMV	90.476	2.16e-51	gi|444474809|gb|AGE10497.1| conotoxin Bt14.1 [Conus betulinus]
Ct-0632	41.85	XIV	cluster_07	MTPVQSMTCCCLLWLMLSVQLVTS	DLTGTARLSRRLAAR	VPSEAHMEILCPEWCEEGRGGIFCSCS	KRRDVVSSSVRRRKRSMMV	75	6.42e-41	gi|444474809|gb|AGE10497.1| conotoxin Bt14.1 [Conus betulinus]
Ct-0633	6.13	None	O2	MGKLTILVLVAAVLLSTQVMVQG	DGDQPADRNAEPRDDNPGGASGKFMNVL	LPTGCPWASWC	G	88.889	7.6e-37	sp|P58786|COW_CONRA Contryphan-R OS=Conus radiatus OX=61198 PE=1 SV=1
Ct-0639	33.05	III	M	MMSKLGVLLTICLLLFPLTA	VPLDGDQPADRPAERMQDISYEKHPWFNPVKR	CCDSPCLHCPPPSNCC		92.647	4.74e-44	gi|371933781|gb|AEX60365.1| M superfamily MMSK group conopeptide Ts3-PPPSN01 [Conus tessulatus]
Ct-0644	4.21	XV	cluster_01	MSTLGMVLLLFLLLLPLGNS	DGDGDRQAMDRDRTASEARSAPRLRLRRHMDRGRSADKR	CSTITCGGDCCASSECTCTSHGGTGNEVGCSCPVMAILL	K	83.838	1.28e-47	gi|948542573|gb|ALM87497.1| Conotoxin [Conus betulinus]
Ct-0647	2.55	VIII	cluster_16	MTMDMKMTFSGFVLVVFVTTVVG		WPDLPIEVSDNLAHCWLPQFRVCFVVCSELGIEADCFASCTSAMDKEYGSQTNAFDCEIFKICYGRCMILGKSERHCWEGTASSVTGTLSDRETC		66.949	1.11e-55	gi|948542613|gb|ALM87517.1| Conotoxin [Conus betulinus]
Ct-0648	133.06	VI/VII	O2	MEKLTILLLVAAVLMSTQA	LIQSGVEKRSKKIKSLSKR	KTSAESWWEGECYGWLASCSSPEQCCSLNCENVYCRAW		89.062	6.25e-39	sp|Q9BPC0|O26X_CONTS Conotoxin TsMEKL-03 (Fragment) OS=Conus tessulatus OX=101317 PE=2 SV=1
Ct-0650	13.61	I	?	MGMQITFTVFLLVVLATTVVS	FTSDRESSHENSKGSNPQKR	LTLVECCRIPDCRIIVLELCLAGENGTAANIF	RRLPYHLSSE	67.5	5.8e-30	sp|P0C8U8|CA14_CONPL Alpha-conotoxin-like Pu1.4 OS=Conus pulicarius OX=93154 PE=3 SV=1
Ct-0656	25.81	VI/VII	cluster_06	MEFPTFVVVLMAAVLLTSILETEA	RRTSFRARLKAKKSVPEETLEEFPER	VEEACEGMPRSCRGKPNGTPCCRNGHCFHGACYI		77.381	1.06e-43	gi|1004614897|gb|AMP44693.1| conotoxin [Conus betulinus]
Ct-0663	11.22	XIV	cluster_07	MTAVQSVTCCCLLWLMLSVQLVTS	DLTGTARLSTRLDAR	VPSETNMELLCPELCEEGNGGIFCTCS	KRRDVVSSSVRRRKRSMMV	78.571	1.88e-45	gi|444474809|gb|AGE10497.1| conotoxin Bt14.1 [Conus betulinus]
Ct-0665	125.83	XIV	cluster_07	MTAVQSVTCCCLLWLMLSVQLVTP	DLTGTARLSRRLAAR	VPSEAHMEILCPEWCEEGRGGIFCSCS	KRRDVVSSSVRRRKRSMMV	75	3.96e-41	gi|444474809|gb|AGE10497.1| conotoxin Bt14.1 [Conus betulinus]
Ct-0672	145.35	XIV	cluster_03	MKLSVMFIVFLMLTMPVIDA	GHSRSAANGGEAAVLAGDRAANLMALLQER	QCPATCSSCTNCT		75.806	5.28e-28	P05662|Pu14.4 precursor|Conus pulicarius|Precursor|conotoxin|L superfamily|||
Ct-0675	158.73	XIV	cluster_03	MKLSVMFIVFLMLTMPVIDA	GHSRRAANEGEAGMLADDRAANLMALLQER	QCPPSCQSCSNC		74.194	4.08e-27	P05662|Pu14.4 precursor|Conus pulicarius|Precursor|conotoxin|L superfamily|||
Ct-0677	282.58	VI/VII	O1	MKLTCMMIVAVLCLTAWTFATA	DDSGNGLENLFLKARHEMNSKVSR	SGNQCRPGGVVCGFPKPGPYCCSGWCFFVCL		80.519	2.34e-43	sp|Q9BPA3|O1610_CONVE Conotoxin VnMKLT1-012 OS=Conus ventricosus OX=117992 PE=2 SV=1
Ct-0680	7.88	I	A	MGMRMMFTVFLLVVLATTVDS	FTSDRAPDGRNAAATDGR	NAAAKAFGLITPTVRDGCCSNPACMLNNPNQC	G	83.099	4.33e-36	sp|F2XFS9|CA16_CONEB Omega-conotoxin Eu1.6 OS=Conus eburneus OX=101300 PE=1 SV=1
Ct-0685	1834.91	XIV	None		MRPLR	TVPGCEIWKADCSFRTCSWNFEWSSTTRCHLQAAISLSFHL		91.304	7.79e-28	gi|920152395|dbj|BAS23841.1| Conotoxin Superfamily T [Conus episcopatus]
Ct-0689	21.41	XV	cluster_01	MSALRMMLLILLLLLPLAAFHGDGQA	IPGDGVPSALSSRVRRLLGGDKKRGRTLKK	DCSSNKTCGSGESEVCCARSDCYCQLIQSRPWSKIVCVCPE		67.089	1.05e-33	sp|P0DM18|NF1_CONMR Conotoxin Mr15.1 OS=Conus marmoreus OX=42752 PE=1 SV=1
Ct-0692	220.1	VI/VII	cluster_14	MSRSGVALFAFLLLWSLLTTVQG	GGEGQKMYHDKHRQAVRKLFTLGRKLKR	NDYCQFPSTTGDDCTGTQICCIPSGSTSGVCKEANECY		72.727	1.13e-35	gi|948542559|gb|ALM87490.1| Conotoxin [Conus betulinus]
Ct-0694	51.53	None	B1	MQLYTHLYLLVPLVTFYLILGTGTLA		HGGALTERRSADATALKPEPVLLQKSAARSTDGNGKDRLTQRKRILKKRGNKARGWEEDREIAETVRELEEIGRR		88.119	2.79e-61	P07814|Conantokin-Qc1 precursor|Conus quercinus|Precursor|conantokin|B1 superfamily|||nucleic acid level
Ct-0700	1.8	VIII	?	MMSKLGVVLVIFLVLSSMEA	LHLDADGLAGVATKQKVDTNAVAEKSILALGLR	REDNNHGLCESSTCASDGECGGEVCGSCSLCTNQDPQCWHCECGQGNPGC	RK	76.699	1.79e-51	gi|1004614861|gb|AMP44679.1| conotoxin [Conus betulinus]
Ct-0702	5.74	IX	cluster_08	MEGRHFAALLILTICLLPPGAGA	SRR	QGLCSLPAVTGPCLAYMPRFYFDWDSKLCKVFIYGGCQGNDNNFHSSTDCYDTCWFE		65.06	3.3e-34	gi|1004614759|gb|AMP44642.1| conotoxin [Conus betulinus]
Ct-0705	89.64	V	?	MLCLPIFLILLLSLSSAAG	FPELQRGLTQHSPKDSGMRANHLFLK	KVGDDCCVGNAGTCC	KK	70.312	5.88e-28	gi|1004614450|gb|AMP44631.1| conotoxin [Conus betulinus]
Ct-0710	532.33	III	M	MLKMGVVPFTFLVLFPLATLQLDA	DQPVERYAENKQDLNPDERR	EFMLPIVRGCCTACRMPPCTCCW		97.015	1.52e-44	gi|371933398|gb|AEX60174.1| M superfamily MLKM group conopeptide Ts3-T01 [Conus tessulatus]
Ct-0713	35.25	XI	?	MKLSLAIVLILMLLSLSTG	AETSDNRASSSATALRDRLLGPK	VPACQGMGGSCIDDYDCCGWFCCGGPFVGCGISVVGC	K	75	1.71e-37	gi|1004614822|gb|AMP44663.1| conotoxin [Conus betulinus]
Ct-0715	16.54	III	M	MGVVLFIFLVLFPLATLQLEA	EQPVERQQDLNVGDTRGIMMHAMSER	TSLHGCCTGQGCWNVPICDCCE		79.71	1.49e-38	gi|1446202354|gb|AXL95479.1| conotoxin precursor superfamily M [Conus ermineus]
Ct-0719	94.86	VI/VII	?	MKLTCVMIVAALFLTACQLSTA	ASYARDKQEYPAVRWSDEMQDADDLTLAKK	CTDDSQFCNPSSHNCCSGTCIDEGGNGVCAIVPVIV		82.353	1.59e-50	gi|805714108|gb|AKB91365.1| conopeptide Mi027 [Conus miles]
Ct-0725	1.9	XV	?	MMEKLAMLLLGATVLLLVQSMVRG	DRGDDQGAWRRVLGLEKR	CKQRGESCDSDSECCDDLSCTCLQASGCSDQTRAKCRTS		37.5	8.53e-13	gi|482544100|gb|AGK23207.1| XV conotoxin S15a precursor [Conus striatus]
Ct-0728	15.94	VI/VII	?	MILAGNLTSYFFTVFFGITKIISRMKLTCVLIIAVLFLTACQLIIA	DFSRDKRVHRAERLRDIMQNFRGTR	SCAQLGEPCSSTACCPDLECVQTYALICLWD		68.831	1.65e-34	gi|444474833|gb|AGE10509.1| conotoxin Bt6.1 [Conus betulinus]
Ct-0733	34.11	XV	O2	MEKLTIRILVAAVLLAIQVLVQS	DGESPLKGRVKQYAAKRLSALMRGPR	QCTTRHQPCDEDEECCPYLECKCFSRPDCQSGYKCKP	R	95.402	2.39e-59	gi|482544090|gb|AGK23202.1| XV conotoxin Vt15a precursor [Conus planorbis]
Ct-0745	420.39	XIV	cluster_03	MKLSVMVIVLVLAMAFTPGLL	LHDDNEGKALGRHDRHVRDTLTDKRAKR	TKCVNSSTCPSPLVCRQGVCERFNADA	GR	70.513	1.99e-34	gi|1004614887|gb|AMP44689.1| conotoxin [Conus betulinus]
Ct-0747	142.98	VI/VII	?	MKLTCVMIVAALFLTACQLSTA	ASYARDKQEYPAVRWSDEMQDADDLTLAKK	CTDDTQFCNPSSHNCCSGTCIDEGGSGVCAIKPVIV		78.824	1.79e-48	gi|805714108|gb|AKB91365.1| conopeptide Mi027 [Conus miles]
Ct-0751	213.26	VI/VII	?	MKLTCVLIVAVLFLTACPLITA	DYSRDKQEDPVVRSSDKVQRSKHRKLAKR	CSDVGAACDTESNICCSGSCFAVAGEPFGLCE		87.671	2.94e-43	gi|444474829|gb|AGE10507.1| conotoxin Bt6.2 [Conus betulinus]
Ct-0760	15.19	XXII	cluster_18	MTRVFIAMFFLLALTEG		CPRLHDHNCENGPNMHYSFTCQTKQRCGIIRKRNGQLTCRLMCKCEPGVDCLHGEDINWGDKTVKFLYCP		80.46	1.68e-52	gi|1004614776|gb|AMP44646.1| conotoxin [Conus betulinus]
Ct-0767	4.82	None	B1	MQLYTYLYLLVPLVTFHLILGTGTLA		HGGALTERRSADATALKPEPVLLQKSAARSTDDNGKDRLTQMNRMLKKRGNAARGAEEDRETVEELHEMGRR		90.625	1.16e-60	gi|326416228|gb|ADZ72979.1| conantokin E1 precursor [Conus eburneus]
Ct-0768	22.6	XXII	cluster_18	MTRVFIAMFFLLALTEG		CPRLHDHNCENGPNMHYSFTCQTKQRCGIIRKRNGQFTCKLMCKCEPGVDCLQGEDINWDDKTVKIIYCP		82.759	1.66e-53	gi|1004614776|gb|AMP44646.1| conotoxin [Conus betulinus]
Ct-0769	3.81	I	A	MGMRMMFTVFLLVVLATTVVS	FTSDRGPASNHENSKGSNPQKR	LTLVECCKIPACRKIVLELCLAGENALNFRLLPYHLSSE		71.25	1.47e-34	P07673|Ca1.12 precursor|Conus caracteristicus|Precursor|conotoxin|A superfamily|I||nucleic acid level
Ct-0773	442.24	III	M	MMSKLGVLLTICLLLFPLTA	VPLDGDQPADQPAERTQNEQHPLFDQKR	GCCRWPCPSRCGMARCCSS		98.507	1.23e-45	sp|H2BKS9|CM3A_CONTS Mu-conotoxin TsIIIA OS=Conus tessulatus OX=101317 PE=3 SV=1
Ct-0775	5.11	XII	cluster_06	MIRMGFFLTLTVAVLLTLLTCTDG	APAEKLEVER	DCSDDCVTCSSDAPCGCCGNVICLDNGVCQFVSDPYQYYDYY		51.899	4.58e-20	gi|1247123541|gb|ATF27819.1| conotoxin [Conus praecellens]
Ct-0776	2.8	VI/VII	cluster_06	MIRMGFFLTLTVAVLLTLLTCTEA	APTNEGEMER	LFDHVGLLLSGCSWCKVTCCPPDFVCQSSECRPA		66.176	3.47e-25	gi|1445798181|gb|AXL93751.1| conotoxin precursor	partial [Conus amadis]
Ct-0779	56.71	XII	cluster_06	MNRMGFFVMLTVAVLLTSLTCTDG	APAETLEVK	RDCPDDCVTCSSDLPCGCCGNVICHSTGLCQLVSDPYEY		58.209	1.08e-20	gi|1247123541|gb|ATF27819.1| conotoxin [Conus praecellens]
Ct-0781	10.94	None	B1	MQLYTYLYLLVPLVTFHLILGTGTLA		HGGALTERRSADATALKPEPVLLQKSAARSTDDNGKDRLTQRKRMLKKRGNTARGWEEDLELAETVSELEEIGKR		90.099	2.3e-63	P05676|conantokin-Pu2 precursor|Conus pulicarius|Precursor|conantokin|B1 superfamily|||
Ct-0785	7.6	IX	cluster_08	MEGRRLAVVLIVTSCLSALTVGES		EPRPGLCFQPVVVGPCRGRFPHYYYNPALDTCQLFFYGGCKGNENRFVDFNSCLYMCKYPWIPYPVD		75.294	5.46e-46	gi|1004614756|gb|AMP44641.1| conotoxin [Conus betulinus]
Ct-0788	148.3	VI/VII	H	MNTAGRLLLLCLALGLVFESLGILVA	DDVEADRDTDPEDKDARNFDR	LTTNVKSDCGGVLCTFGCCKIVNGERKCNEFECS		70.37	3.79e-28	P08094|T6.9 precursor|Conus tulipa|Wild type|conotoxin|H superfamily|VI/VII||nucleic acid level
Ct-0793	62.39	XXII	cluster_18	MTRVFLAMFFLLALAEG		WPRMYDSDCELGRNMGYTCIQDEQCGRILRRNGVLRCYLRCPCEGGHSCLHGEDVNWDERSSKIYSCPWP		60.92	2.18e-38	gi|1446202462|gb|AXL95533.1| conotoxin precursor superfamily E [Conus ermineus]
Ct-0795	3.13	XIV	A	MGMRMMFTVFLLVVLATTVVS	FTSDHASHGRNAAANVKASDLMARVLDIR	CAHSVPGMHPCKCNNTC	R	79.71	1.42e-32	sp|C6ZJQ2|CAE1_CONPL Alpha-conotoxin Pu14.1 OS=Conus pulicarius OX=93154 PE=1 SV=1
Ct-0796	5.07	III	M	MLKMGVVPFTFLVLFPLATLQLDA	DQPVERYAENKQDLNPDKRREIILPALSQK	CCSLTVCLKALCKCCA		77.143	2.33e-34	gi|570999751|gb|JAB84687.1| M_Vc3.1 prepropeptide [Conus victoriae]
Ct-0801	15.67	XV	O2	MEKLTIRILVAAVLLAIQVLVQS	DGESPLKGRVKQYAAKRLSAHMRGSR	QCTTRYQPCDEDEECCPYLECKCFTRPDCQSGYKCRP	R	91.954	1.59e-56	gi|482544090|gb|AGK23202.1| XV conotoxin Vt15a precursor [Conus planorbis]
Ct-0802	15.78	VI/VII	O1	MKLTCVLIIAVLFLTACQLIIA	DFSRDKRVHRAERLRDIMQNFRGTR	SCAEFGEVCSSTACCPDLDCVETYSPICLWE		72.727	2.35e-37	gi|444474833|gb|AGE10509.1| conotoxin Bt6.1 [Conus betulinus]
Ct-0806	448.54	VI/VII	O2	MEKLTILLLVAAVLMSTLFLA	QGVGEKTQKAKIDLFKARKLSGNKQTR	DECLGWSAYCGPWNNPPCCDWYICESSYCDFDWD		64.557	1.99e-30	sp|Q9BPC2|O266_CONVE Conotoxin VnMEKL-0111 OS=Conus ventricosus OX=117992 PE=2 SV=1
Ct-0807	258.06	III	M	MMSKLGVLLTICLLLFPLTA	VPLDGDQPADQPAERMQDDISSEQHPFFDPVKR	CCVVCNAGCSGHCCW		98.507	2.02e-45	gi|371933803|gb|AEX60376.1| M superfamily MMSK group conopeptide Ts3-SGN01 [Conus tessulatus]
Ct-0811	12.08	VI/VII	H	MNTAGRLLLLCLALGLVFESLG	IPVADDVEADRDTDPEDEDARGFDR	LTTVKGECGGVLCTFGCCKTVNGERQCRVFECL		71.605	4.44e-29	P08094|T6.9 precursor|Conus tulipa|Wild type|conotoxin|H superfamily|VI/VII||nucleic acid level
Ct-0813	22.82	I	A	MGMRMMFTVFLLVVLATTVVS	FTSDHESNHGNRRASKQIPR	GLWVECCADPPCRQNNMEHCPAN		87.5	3.25e-39	gi|1004613979|gb|AMP44588.1| conotoxin [Conus betulinus]
Ct-0816	10.09	XXVII	cluster_06	MRYHLMLTVILLLTLFTGGDA	GPRRANRLEKHFVSR	DCQSGCVGCHNPAGCCCGNQVCVNNNHCEPSSLWF		73.239	1.94e-28	P08590|Ml27.2 precursor|Conus miliaris|Precursor|conotoxin|G2 superfamily|XXVII||nucleic acid level
Ct-0818	208.18	XIV	None		MRPLR	TVPGCEIWKADCSFRTCSWNFEWSLTTRCHLQATISLSFHLWNWMI		94.118	2.53e-32	gi|920152395|dbj|BAS23841.1| Conotoxin Superfamily T [Conus episcopatus]
Ct-0822	1.88	XIV	cluster_03	MMSVMLIVSLVLTLSFTDG	IKFPGSKAFPRSDTATNQRVR	QGGVHAGCSQCPSGICDADATCVPPGEVNN	GRRSTPHMK	40.299	7.24e-08	gi|1247123153|gb|ATF27625.1| conotoxin [Conus praecellens]
Ct-0823	240.23	IX	P	MHLSLARSAVLMLLLLFALGNFVGVQP	GQITRDVDNGQLTDNRRNLRSQWKPMSLFKSLDKR	VSCGDSCINSDECPSSCNTCLHALCKS		76.136	3.85e-44	gi|763708462|gb|JAG92776.1| Ctr_68_N conopeptide precursor [Conus tribblei]
Ct-0824	3049.58	None	O2	MGKLTILVLVAAALLSTQVMVQG	DGDQPEDRDAVPRDDNPGGTSGKFMNVLR	QSGCPWSPWC	G	90.476	6.83e-39	sp|P0C248|COW_CONAA Contryphan-Am OS=Conus amadis OX=198732 PE=1 SV=2
Ct-0825	347.24	None	B1	MQLYTYLYLLVPLVTFHLILGTGTLA		HGGALTERRSADATALKPEPVLLQKSAARSTDGNGKDRLTQRKRILKKRGNKARGWEEDREIAETVRELEEIGRR		88.119	2.79e-61	P07814|Conantokin-Qc1 precursor|Conus quercinus|Precursor|conantokin|B1 superfamily|||nucleic acid level
Ct-0826	30.75	XVII	cluster_01	MQKATVLILAILLLLPLSTA	QDDEGSQENAAQREVDITTR	CSGVGDPCGGSAGQSCCGILKCVSSQCCRTTDC		79.73	5.65e-35	gi|1004615041|gb|AMP44751.1| conotoxin [Conus betulinus]
Ct-0829	30.4	VI/VII	?	MKLTCMMIVAVLCLTALTFVTA	DDSGNGLENLFPKARHETKNPEASKLYKR	CLENGEPCDPVTSNCCSGTCVLVCV		76.316	7.04e-39	gi|1004614934|gb|AMP44708.1| conotoxin [Conus betulinus]
Ct-0830	10.62	XIV	None		MKGTRQSKIKPGSTEGSRRHHSKQTMKHLPLQQSTR	PGRPQNEPKAAHLLFNSEAARFFISSCAFEKKFCHPSAISGLFMEPSAMTDVQAVKNSTATIIMHVSFILLMFYVMPKKTAEKCAAKFTVQGPGRRCDTRVTVACFYTLPAVSHLPKSLFLTQL		88.889	1.77e-10	gi|551477682|dbj|BAO02224.1| Mr_precursor_150 [Conus marmoreus]
Ct-0834	47.95	XXII	cluster_18	MTRVFLAMFFLLALAEG		WPRMYDSDCELGRNMGYTCIQDEQCGRILKRNGVLRCYLRCPCEGGHSCLHGEDVNWDERSSKIYSCPWP		62.069	9.45e-39	gi|1446202462|gb|AXL95533.1| conotoxin precursor superfamily E [Conus ermineus]
Ct-0837	4.71	VI/VII	None		MNPEASKLNKK	DCADGGQFCGFPKIGGPCCSGWCFFVCA		90	2.88e-21	sp|Q9BPA5|O168_CONVE Omega-conotoxin-like VnMKLT1-0111 OS=Conus ventricosus OX=117992 PE=2 SV=1
Ct-0838	2.07	XIV	cluster_03	MQPSVMLVVLLMLTMPLING	FILKTATGMEDFVPNERSESDSQIGKR	RCPPGCYSCPEDTKDWKCTTGS		53.488	1.83e-11	gi|763708536|gb|JAG92813.1| Ctr_157_T conopeptide precursor [Conus tribblei]
Ct-0840	46.42	III	?	MLKMGVVLFIFLVLYPLATL	QLDADQPVERYAENKQDLNPDKRREIILPALSQK	CCSLTVCLKALCKCCA		78.571	9.24e-36	gi|570999751|gb|JAB84687.1| M_Vc3.1 prepropeptide [Conus victoriae]
Ct-0841	25.74	VI/VII	cluster_06	MEFPTFVMVLMAAVLLTSILETEA	RTSFRARLKAKKSVPEETLEEFPER	VEEACEGMPRSCRGKPNGTPCCRNGHCFHGACYI		79.518	2.84e-46	gi|1004614897|gb|AMP44693.1| conotoxin [Conus betulinus]
Ct-0842	5.96	XIV	None			MTVTTPFFTDMTALCSDKRKRREASSMSITTPLRQQELQEKLMPLNSLSDRDPRQPQERFVACTQCASAYSAATKSVGSWFFHKTANAMYCPKFKACMPEI		61.053	7.76e-37	gi|570999801|gb|JAB84712.1| Conodipine_Vc2 prepropeptide [Conus victoriae]
Ct-0843	4.97	IX	None		MADSR	THYESMHSLQTCHAVSGYNGTPSASSTSTISSLISIKKKCQILWPFMPCSYSDLFSIYSPCLCPWRICVEVVAIWKLMGTIAEWTWWPPLEVDTHSWQLRT		41.463	9.93e-07	gi|1446202878|gb|AXL95741.1| conotoxin precursor superfamily W [Conus ermineus]
Ct-0844	16.28	XVI	T	MLCLPVFIILLLLASPAAP	NPLERRIQSDLIR	AALEDADMKSEKGIMSMLGKLSKVVNIGDMASMASSLLCSVCTSCCSTE		68.354	5.99e-32	gi|1004615048|gb|AMP44754.1| conotoxin [Conus betulinus]
Ct-0845	96.38	XXIII	None			MKQPVLHISYPGTVWRCRFRCQQQLVQTEQRRLPAMALIRQFCRVYPLCCSECLFRFSYRHLQGLRESNRFGFSFPKGLELQVKPTEE	G	66.667	0.00051	gi|948542609|gb|ALM87515.1| Conotoxin [Conus betulinus]
Ct-0846	23.09	VI/VII	O1	MKLTCVLIVAMLFLMACQLITA	DYSREKQGYPAVRSSDKIQDSDHIKLTKR	CTDGGDDCEPGNHNCCSGSCIASEAGDYCAMSVEYQFVVS	R	72.826	8.6e-47	gi|1004614936|gb|AMP44709.1| conotoxin [Conus betulinus]
Ct-0852	8.37	V	cluster_13	MATNLWMTLSMLVMVIMATAVS	DSTPFHETKAESDPREVRSLALQR	SFCCSLGLPMEWCCP	G	62.295	2.42e-20	gi|1782804342|gb|QGV13643.1| conopeptide [Conus arenatus]
Ct-0854	83.64	XV	cluster_01	MSTLGMVLLLFLLLLPLGNS	DGDGDRQAMDRDRTASEARSAPRLRLRRHMDRGRSADKR	CSTITCGGDCCASSECTCTSHGGTSNEVGCSCPAMILL		82.474	3.1e-45	gi|948542573|gb|ALM87497.1| Conotoxin [Conus betulinus]
Ct-0861	3.48	XXIII	A	MGMRMMFTVFLLVVLATTVDS	FILDR	GKSISKFSCFVTWRQSAFVALNRSVLHCISFYCFAVRCCAVYWSMLCSSVL		82.759	6.36e-11	gi|218944618|gb|ACL13208.1| conotoxin Pu14.3 [Conus pulicarius]
Ct-0862	101.26	I	A	MGMRMMFTVFLLVVLATTVVS	FNSDRASDSRNAADNKAYDLLAMTVR	GGCCSYPPCMNNNPWCG	GRR	78.333	4.74e-29	gi|1004615066|gb|AMP44757.1| conotoxin	partial [Conus betulinus]
Ct-0863	2.45	VI/VII	cluster_06	MEFPTFVMVLMAAILLTSILETEA	RTSFRARLKAKKSVPGETLREFPER	VEEACEGTPTSCRGKPNGTICCRYGHCFQGVCYI		75.904	5.06e-44	gi|1004614897|gb|AMP44693.1| conotoxin [Conus betulinus]
Ct-0865	2.95	IX	?	MSKVGVVLLIFLVLLSLAAL	QNGDDARRQRHEKQSPRRGTMWSTPRNYHSQRR	CANGSPCGECTSEGKTCQVQSGGKGTCGQCV		67.816	7.98e-26	gi|1004614851|gb|AMP44675.1| conotoxin [Conus betulinus]
Ct-0867	256.27	VI/VII	None		MLFYLISR	TRSNCIGMSSYCGKWNHPPCCKGYTCENYYCALDW		61.111	1.79e-10	sp|Q9BPC2|O266_CONVE Conotoxin VnMEKL-0111 OS=Conus ventricosus OX=117992 PE=2 SV=1
Ct-0870	189.91	None	O2	MGKLTILVLVAAALLSTQVMVQG	DGDQPEDRDAVPRDDNPGGTSGKFMNVLRRS	GCPWQPWC	G	92.063	1.93e-39	sp|P0C248|COW_CONAA Contryphan-Am OS=Conus amadis OX=198732 PE=1 SV=2
Ct-0872	69.21	VI/VII	?	MEKLRILLLVAAVLKSTQA	LIQRGGARRRKVNFLSIREPGFVDWR	EGNCTPWLGGCTSLEECCAGICETYCWAWRCTLSPRHPT		86.667	1.08e-42	sp|Q9BPB9|O263_CONTS Conotoxin TsMEKL-011 OS=Conus tessulatus OX=101317 PE=2 SV=1
Ct-0874	1.69	XV	O2	MEKLTIRILVAAVLLAIQVLVQS	DGESPLKGRVKQYAAKRLSALMRGPR	QCTTRHQPCDEDEECCPYLECKCFTRPDCQSGYKCKP	R	96.552	9.83e-60	gi|482544090|gb|AGK23202.1| XV conotoxin Vt15a precursor [Conus planorbis]
Ct-0875	50.76	None	B1	MQLYTYLYLLVPLVTFYLILGTGTLA		HGGALTERRSADATALKPEPVLLQKSAARSTDGNGKDRLTQRKRILKKRGNKARGWEEDREIAETVRELEEIGRR		89.109	3.95e-61	P05676|conantokin-Pu2 precursor|Conus pulicarius|Precursor|conantokin|B1 superfamily|||
Ct-0876	24.58	VI/VII	cluster_01	MHTLEMLLLLILLLLPLAPG	EGDGRAVGGDTNPGEARRTYKRLLQRSAKRMDGR	NCTPCGPGLCCGPGKTCGKSKNHKTYNQPACV		72.941	3.27e-34	gi|564731450|gb|AHB89644.1| Q-conotoxin peptide precursor	partial [Conus quercinus]
Ct-0877	554.35	XIV	cluster_03	MKLSVMVIVLVLAMAFTPGLL	LHDDNEGKALGRHDRHVRDTLTDKRAKR	TKCVTSATCPSPLVCRLGVCDQYNSDM	GR	76.923	5.6e-38	gi|1004614887|gb|AMP44689.1| conotoxin [Conus betulinus]
Ct-0884	2.47	XXIII	A	MGMRMMFTVFLLVVLATTVDS	FILDR	GKSISKFSCFETWRQSAFVALNRSVLHCISFYCFAVRCCAVYWSMLCSSVL		64.103	4.15e-11	gi|218944618|gb|ACL13208.1| conotoxin Pu14.3 [Conus pulicarius]
Ct-0890	5.62	None	O1	MKLTCMMIVAVLFLTAWTFVTA		DDSINGLENRGIWGEPLSKARDEMKNPEASKLNKRYVPVGE		82.54	7.46e-33	P06842|Ml6.7 precursor|Conus miliaris|Precursor|conotoxin|O1 superfamily|VI/VII||
Ct-0891	103.52	VI/VII	cluster_05	MKISWIICLLLIAFMIDDGST	GNTMYSRKGAGIASGIKRFQKSFLRR	SCNNCPEEPCCYGDQCMPDPGYEPFCGN		81.333	2.1e-35	gi|948542547|gb|ALM87484.1| Conotoxin [Conus betulinus]
Ct-0893	179.98	XIV	cluster_07	MTSVQSVTCCCLLWLMLSVQLVTP	GSPGTAQLPRDRTAR	VPAEPVLEIICPHMCSIGIGEPFCNCRN	KRDVVSSRIIRRKRPMAV	88.235	4.73e-52	gi|444474807|gb|AGE10496.1| conotoxin Im14.1 [Conus imperialis]
Ct-0897	27.02	XVII	cluster_01	MQKATVLILAILLLLPLSTA	QDDEGSQENAAQREVDISTR	CSGVGDPCGGSAGQSCCGILKCVSSQCCRTTDC		78.378	1.49e-34	gi|1004615041|gb|AMP44751.1| conotoxin [Conus betulinus]
Ct-0902	19.39	IX	P	MHLSLARSAVLMLLLLFALGNFVGVQP	EQITRDVDNGRLTDNRRNLPSQWKPVSLFKSLDER	QSCTGSCNADSDCDSVCDCWKKKCMYFM		77.907	5.27e-37	gi|570999661|gb|JAB84642.1| P_Vc14.5 prepropeptide [Conus victoriae]
Ct-0909	16.66	XIV	?	MKFSSCLVLTLLVFVSA	EDVKQEESVHVLTTK	NFDSFIADNEFVLVEFYAPWCGHCKALTPEYAKAAATLEEEESNIKLAKVDATVEQSLASKFDVRGYPTIKFFRKEKPDSPADYNGGRQAVDIVNWLKKKTGPPAKELKKKDDAKSFVEKDEVVVIGFFKDQESAGALAFKKAAAGIDDIPFAITSEDHVFKEYKMDKDGIVLLKKFDEGRNDFEGEFEEEAIVKHVRENQLPLVVEFTQESAQKIFGGEVKNHILLFLKKEGGEDTIEKFRGAAEDFKGKVLFIYLDTDNEENGRITEFFGLKDDEIPAVRLIQLAEDMSKYKPESSDLETATIKKFVQDFLDGKLKPHLMSEDVPDDWDAKPVKVLVGKNFKEVAMDKSKAVFVEFYAPWCGHCKQLAPIWDELGEKYKDSKDVVVAKMDATANEIE…	RTLDAFVKFLESGGTEGAGVPEEEEEEEEDEEGDDEDLPRDEL	39.13	1.2e-13	gi|1790196656|tpg|DAC80631.1| TPA_inf: thioredoxin domain-containing protein 5 [Conus magus]
Ct-0911	3.21	VI/VII	cluster_06	MRVLLFLALAVLLTSFTETEG	RLVRELLRNPKAKR	IDCVSCGGRNCCKPRQCGGTTCHS	GR	77.049	2.01e-22	gi|1004614395|gb|AMP44619.1| conotoxin	partial [Conus betulinus]
Ct-0912	543.43	VI/VII	cluster_06	MRFYMLLAVALLLNSVMS	TDDVSIHQTDAKRQQKK	DDDDNCPSSHPYFCLSLHVDNCCKTQCGSGNRCNSNEYVIME		73.684	7.77e-38	gi|1446202368|gb|AXL95486.1| conotoxin-like precursor unassigned superfamily 01 [Conus ermineus]
Ct-0917	36.62	None	O2	MGKLTILVLVAAVLLSTQVMVQG	DGDQPADRNAEPRDDNPGGASGEFMNVLRRS	GCPWEPWC	G	95.238	5.94e-41	sp|P58786|COW_CONRA Contryphan-R OS=Conus radiatus OX=61198 PE=1 SV=1
Ct-0918	11.36	VI/VII	O1	MKLTCVLIIAVLFLTACQLIIA	DFSRDKRVHRAVRLRDIMRNFRGTR	SCAEFGEVCSSTACCPDLDCVETYSPICLWE		75.325	9.33e-39	gi|444474833|gb|AGE10509.1| conotoxin Bt6.1 [Conus betulinus]
Ct-0919	37.85	XI	cluster_10	MKLALTFLLILMVLPLMTG	EKKSGDHERRSVQSLRAVFRDHR	QFDCIDGGENCRVNSNCCSYLCCQKSIGKRCAIQRSVGCDDFRI		79.07	2.85e-50	gi|1446202916|gb|AXL95760.1| conotoxin precursor superfamily I1 [Conus ermineus]
Ct-0920	20.27	XI	cluster_10	MKLALTFLLILMVLPLMTG	EKKSGDHERRSVQSLRAVFRDLR	QFDCVDGGEQCRVNSNCCSYLCCQKSIGKRCAIQRSVGCDDFRI		75.581	1.03e-47	gi|1446202916|gb|AXL95760.1| conotoxin precursor superfamily I1 [Conus ermineus]
Ct-0921	1554.67	XV	?	MEKLTALMVVAVVLVLIQVKG	QGKQGNSPTDVHKRLRDSFVQRVRR	CQEPSETCNESGECCAPYVCKCTSGSVCNARCSKAPPA		58.974	1.19e-26	gi|1004614366|gb|AMP44617.1| conotoxin [Conus betulinus]
Ct-0922	2910.02	XIV	None		MIIEDDGTLKKR	FSWCHCFVYLSFIFFVTFVYFSVCFALNRSVNVCLL		46.667	5.16e-05	gi|920148907|dbj|BAS22932.1| Conotoxin Superfamily SF9 [Conus episcopatus]
Ct-0926	128.49	XV	cluster_01	MSTLGMVLLLLLLLLPLGNS	DGDGDRQAMDRDRIASDERSAPRLHLRRHVAHGRLANKR	CSTKICGDDCCSSSACECEVHGGTSNEVGCSCP		85.87	2.21e-46	gi|1004614931|gb|AMP44707.1| conotoxin [Conus betulinus]
Ct-0932	195.26	XIV	A	MGMRMMFTVFLLVVLATTVVS	FSADRANVKASDLIAQATR	DGCPPHPVPGMHPCMCTNTC	G	67.647	9.55e-28	sp|C6ZJQ2|CAE1_CONPL Alpha-conotoxin Pu14.1 OS=Conus pulicarius OX=93154 PE=1 SV=1
Ct-0936	11.92	VIII	cluster_11	MLLAYFRPSAFTSPATMRRAVILFSCIVLAVQA		SDVLEFTDSNFESKIKELDVALVEFYAPWCGHCKRLAPEYDAAAKQLKKGDPPVPLVKVDCTAETKTCQEYGVSGYPTLKIFKGGEFAKDYNGPRESKGIISTMLKEAGPASKELEDFKQFEDFIGRETACLVGFFADADSEMAKTFSKLADTHEGDVRFGHTTASAIMDKAKYKDEIVLFRPKAMQNKFEDSAVKFPGDATKKSAIKEFMTQEHLGMCGLRTINNAGDFSKPTFVAFYDVDYVKNPKGSNYWRNRVMKVGKKLRDEGLKVFFGVSNREEHSHELGECGLQDAEGDKPIVCAYDEKNRKFKMEEEFSVDSFEKFVRGVLNGEVEAYLKSEPVPENNDQPVKVVVAKNFDELVNDPEKDVLIEFYAPWCGHCKSLAPKYDELAEKLKDET…	KKYEGGREVNDFIKYLAKEATDELQGFDRKGKKKGGQKQKKKTEL	34.653	1.05e-13	gi|1790196656|tpg|DAC80631.1| TPA_inf: thioredoxin domain-containing protein 5 [Conus magus]
Ct-0937	83.85	IX	?	MSKVGVVLLIFLVLLSLAAL	QNGDDPRQQRDEKQSPRRDIVRGTLRNYHSQRR	CANGSPCSECTSEGKTCQVQPGGKGTCGECV		71.014	2.48e-30	gi|1790196398|tpg|DAC80582.1| TPA_inf: conotoxin superfamily M [Conus magus]
Ct-0938	43.33	XV	?	MMEKLAMLLLGATVLLLVQA	MVQGDRGDDQGAWRGVLGLEKR	CKKMGDPCTFKSGECCQGLKCKCVQASACSDKTRGKCKPI		36.709	7.49e-10	gi|482544098|gb|AGK23206.1| XV conotoxin Tx15a precursor [Conus textile]
Ct-0939	1121.48	XXIV	None			MEMNLQTYLNCVRRTLHLSVVPGLIPSDGAARRIAGYASLVAQIDQLHYCCHVKCLMN	K	44.898	5.8e-05	gi|920147866|dbj|BAS22331.1| Conotoxin Superfamily M [Conus episcopatus]
Ct-0942	129.94	XIV	cluster_03	MNFSVVFIVALVLTLSMTDG	FIRPAENGGRAFGQHGPDAKDLQTRQIKTR	DLCPHCPNGCHVDRTCIE		79.104	8.05e-39	gi|1004614907|gb|AMP44697.1| conotoxin [Conus betulinus]
Ct-0943	226.54	XIV	cluster_03	MNFSVVFIVALVLTLSMTDG	FMRPAENGGR	TFRQHSPDAKDLKTHQIKTWHHCHNCPIGCRADHTCIVLE		70.149	2.3e-31	gi|1004614907|gb|AMP44697.1| conotoxin [Conus betulinus]
Ct-0944	41.08	XIII	cluster_04	MNCLQPLLVLLLISTITA	LYQDDRATPREGRTMSNLLNILKR	ECSSDCVPHCPNRNECCDGDVCSYSSTLEKWFCIGCGSGGGE		77.215	5.67e-38	gi|763708402|gb|JAG92746.1| Ctr_131_T conopeptide precursor	partial [Conus tribblei]
Ct-0946	7.19	I	?	MGMKITFTVFLLVVLATTVVS	FTSDRESSHENSKGSNPQKR	LTLVECCRIPDCRIIVLELCLAGENGTAANIF	RRLPYHLSSE	67.5	6.69e-30	sp|P0C8U8|CA14_CONPL Alpha-conotoxin-like Pu1.4 OS=Conus pulicarius OX=93154 PE=3 SV=1
Ct-0952	226.39	VI/VII	None			MKTTSDFCAVNGVSEGQKMYHDKHRQAVRKLFTLGRKLKRNDYCQFPSTTGDDCTGTQICCIPSGSTSGVCKEANECY		69.118	1.08e-30	gi|948542559|gb|ALM87490.1| Conotoxin [Conus betulinus]
Ct-0960	31.2	XXII	cluster_18	MTRVFIAMFFLLALAEG		WPRMYDTDCELGRNMAYTCIQDEQCGRILKRNGVLRCYLRCPCEGGHSCLHGEDVNWDERSSKIYSCPWP		62.069	9.25e-39	gi|1446202462|gb|AXL95533.1| conotoxin precursor superfamily E [Conus ermineus]
Ct-0961	22.46	XXII	cluster_18	MTRVFIAMFFLLALTEG		CPRLHDHNCENGPNMHYSFTCQTKQRCGIIRKRNGQLTCRLMCKCEPGVDCLQGEDINWDDKTVKIIYCP		82.759	1.2e-53	gi|1004614776|gb|AMP44646.1| conotoxin [Conus betulinus]
Ct-0964	110.28	VI/VII	O2	MEKMTILLLVAAVLMSTQALMG	AGGEKRRKVNFFSKR	KTTAESWWEGECTDWLGGCTSPAECCSGNCDGYCTAW	R	76	6.19e-38	sp|Q9BPB9|O263_CONTS Conotoxin TsMEKL-011 OS=Conus tessulatus OX=101317 PE=2 SV=1
Ct-0966	2.93	IX	?	MFRVGIVLYTFLLLVTLTAG	QQNGRDEQAVQKNINKPAR	DTSYSLIQALRSGADCNGKDCYVSNCQGSCTCYKEIGKCINS		34.667	1.6e-06	gi|371933458|gb|AEX60204.1| M superfamily MLKM group conopeptide Vr3-DPP02 [Conus varius]
Ct-0967	23.43	XV	cluster_01	MSTLGMVLLLFLLLLPLGNS	DGDGDRQAMDRDRIASDERSAPRLRLRRHMDRGRSVDKR	CSTITCGGDCCASSECTCTSHGGTGNEVGCSCPVMAILL	K	79.798	5.26e-45	gi|948542573|gb|ALM87497.1| Conotoxin [Conus betulinus]
Ct-0972	3.15	VI/VII	cluster_06	MRVLLFLALAVLLTSFTETEG	RLVRELLRNPKAKR	FECVSCGGSNCCSPKWCSGSTCYS	GR	81.967	1.08e-23	gi|1004614395|gb|AMP44619.1| conotoxin	partial [Conus betulinus]
Ct-0975	6.17	IX	cluster_08	MEERRLAVVLIVTSCLSALTVGES		EPRPGLCFQPVVVGPCRGRFPHYYYNPALDTCQLFFYGGCKGNENRFVDFNSCLYMCKYPWIPYPVD		74.118	5.59e-45	gi|1004614756|gb|AMP44641.1| conotoxin [Conus betulinus]
Ct-0977	35.81	XXXIII	cluster_09	MKMLESAVWILTALSLPWVVA		WDSSTAELCKENSNGCSVPVQWMPCQEQFRPACDRHDTCYVCGAHFHLTQDDCDNAFFTDMTALCSDKRKRREASSMSITTPLRQQELQEKLMPLNSLSDRDPRQPQERFVACTQCASAYSAATKSVGSWFFHKTANAMYCPKFKACMPEI		65.217	2.97e-86	gi|570999801|gb|JAB84712.1| Conodipine_Vc2 prepropeptide [Conus victoriae]
Ct-0979	210.59	VIII	cluster_16	MTMDMKMTFSGFVLVVFVTTVVG		WPDLPLEVSDNLAHCWLPQFRVCFVVCSELGIEADCFASCTSAMDKEYGSQTNAFDCEIFKICYGRCMILGKSERHCWEGTASSVTGTLSDRETC		66.949	1.26e-55	gi|948542613|gb|ALM87517.1| Conotoxin [Conus betulinus]
Ct-0980	1844.08	XIV	cluster_07	MTPVQSMTCCCLLWLMLSVQLVTP	DLTGTARLSRRLAAR	VPSEAHMEILCPEWCEEGRGGIFCSCS	KRRDVVSSSVRRRKRSMMV	73.81	3.67e-40	gi|444474809|gb|AGE10497.1| conotoxin Bt14.1 [Conus betulinus]
Ct-0987	56.18	XIII	cluster_04	MNCLQLLLVLLLVSTITA	LYQDDRATPREGRTMSNLLNILKR	ECSSDCVPHCPNRNECCDGDVCSYSSTLEKWFCIGCGSGGGE		75.949	7.88e-38	gi|763708402|gb|JAG92746.1| Ctr_131_T conopeptide precursor	partial [Conus tribblei]
Ct-0990	1.8	VI/VII	?	MNLTCALIVAVLFLSACQL	TTTDDSTGRQEYPTKRLRVKMTNSKIFRLTKR	CTSPGGGCTYWIANCCSRLCMLRKRGGPVCVEEEE		72.619	1.78e-43	gi|1004614964|gb|AMP44720.1| conotoxin [Conus betulinus]
Ct-0993	34.54	XXII	cluster_18	MTRVFIAMFFLLALTEG		CPRLHDHNCENGPNMHYSFTCQTKQRCGIIRKRNGQLTCRLMCKCEPGVDCLHGEDINWGDKTVKIIYCP		82.759	1.81e-53	gi|1004614776|gb|AMP44646.1| conotoxin [Conus betulinus]
Ct-0994	12.71	VI/VII	?	MNLTCALIVAVLLLTACQL	TTTVDSRGKLKYLTKMSRAKIQNHKLSKLTKR	CDPPGSGCTFWENECCNTCQLREKEPPVCVV		81.429	7.17e-39	gi|1004615142|gb|AMP44785.1| conotoxin	partial [Conus betulinus]
Ct-0997	703.62	V	?	MRSLPVVVILLLLIASAASIDA	QSKTKDDAPLTSPNDNALQQHWNKR	CCPRKIWCCMFP	G	89.831	6.31e-35	sp|P0C641|CT56_CONPL Conotoxin Pu5.6 OS=Conus pulicarius OX=93154 PE=2 SV=1
Ct-1001	3230.97	VI/VII	O2	MEKLTILLLVAAVLMSTLFLA	QGVGEKTQKAKIDLFKARKLSENKQTR	GECVGWSAYCGPWNNPPCCDWYVCEGVYCALDWD		67.949	1.15e-30	sp|Q9BPC2|O266_CONVE Conotoxin VnMEKL-0111 OS=Conus ventricosus OX=117992 PE=2 SV=1
Ct-1005	8.02	VI/VII	O1	MKLTCMMIVAVLFLTAWTFVTT	DDSINGSENRRIWEKLLSKARDEMKNPEASKLNKR	CLPDGEYCGVSSECCSGTCLIVCSPRSLRLLSVLPGLTFDWRVPFTGYKPLCSSSLDASGVQHPNKATSQ		78.049	5.56e-41	sp|Q9BPA0|O1613_CONVE Conotoxin VnMKLT1-022 OS=Conus ventricosus OX=117992 PE=2 SV=1
Ct-1009	45.67	VI/VII	None		MSTLLLAQGVGEKTQKAKIALFKARKLAGNKQTR	DVCLGWSADCGPGNNPPCCEWYVCEGVYCALDV		64.062	6.51e-23	gi|1004615004|gb|AMP44736.1| conotoxin [Conus betulinus]
Ct-1010	21.54	XIV	A	MGMRMMFTVFLLVVLATTVVS	FTSDHASDGRNAAANVKASDLMARVLDR	GCPEVPVPGMHPCVCRKTCV		85.294	1.51e-37	sp|C6ZJQ2|CAE1_CONPL Alpha-conotoxin Pu14.1 OS=Conus pulicarius OX=93154 PE=1 SV=1
Ct-1016	28.28	XV	cluster_01	MSALRMMLFILLLLLPLAAFHGDGQA	IPGDGVPSALSSRVRRLLGGDKKRGRTLKK	DCSSNKTCGSGESEVCCARSDCYCQLIQSRPWSKIVCVCPE		67.089	1e-33	sp|P0DM18|NF1_CONMR Conotoxin Mr15.1 OS=Conus marmoreus OX=42752 PE=1 SV=1
Ct-1019	20.12	VI/VII	H	MNTAGRLLLLCLALGLVFESLGILVA	DDVEADRDTDPEDEDARGFDR	LTTVKGECGGVLCTFGCCKTVNGERQCRVFECL		70.37	2.95e-28	P08094|T6.9 precursor|Conus tulipa|Wild type|conotoxin|H superfamily|VI/VII||nucleic acid level
Ct-1024	7.54	VI/VII	cluster_01	MHKLEMLLLILLLLPLAPG	EGDGRAVGGDTNPGEARRTYKRLLQRSARRMDGR	ECTPCGPSLCCESGLRCGTSTHHQTYGEPACLNY		80.46	1.64e-40	sp|V5V9Y7|CQ62_CONCB Conotoxin Ca6.2 OS=Conus caracteristicus OX=89440 PE=3 SV=1
Ct-1026	5.2	V	?	MLCLPIFLILLLSLSSAAG	FPAESELQRDLALQSPKDFGMRTDHLLLKK	VGDDCCVGNAGTCC	KK	73.438	6.16e-32	gi|1004614450|gb|AMP44631.1| conotoxin [Conus betulinus]
Ct-1033	209.97	XXXIII	cluster_02	MKIYLCLAILLLASTIVYS	GLLDKIETERR	QDVYCDACNCAELRTPRCTDPMFCDTTDCPFWPSCGGKCACTRFVSGRCTRYEECVPGQC		48.485	4.28e-14	gi|1004614884|gb|AMP44688.1| conotoxin [Conus betulinus]
Ct-1036	762.82	XIV	None			MRPLQTVPGCEIWKADCSFRACSWNFEWSSTTRCHSQTAISLSFHLWNWMI		86.275	2.32e-29	gi|920152395|dbj|BAS23841.1| Conotoxin Superfamily T [Conus episcopatus]
Ct-1037	178.94	XIII	cluster_04	MNCLQLLLVLLLVSTITA	LYQDGRATQRRGRTIR	KMSNLLNIQTRECPSGCPVSCPDRNECCSGITCTYITEGGPYYCIGCGGGGGE		82.716	1.79e-36	gi|948542563|gb|ALM87492.1| Conotoxin [Conus betulinus]
Ct-1038	21.82	XIV	A	MGMRMMFTVFLLVVLATTVDS	FILDRASDGR	DAAVIYTDSEVIDMEDCDPASRCWNPACGKNYGRC	R	73.134	2.24e-28	gi|218944615|gb|ACL13207.1| conotoxin Pu14.2 [Conus pulicarius]
Ct-1039	7.45	XI	None			MLIMATGIYSSVSCMFAFGNNVFLLIVLFNRVLVMTCQGMGESCGTDDNCCGSLCCVGTKCVMTIVEC		53.061	2.01e-09	sp|D2DGD7|I3B2_CONPL Conotoxin Pu11.2 OS=Conus pulicarius OX=93154 PE=3 SV=1
Ct-1041	331.2	XIV	None		MRPLR	TVPGCEIWKADCSFRTCSWNFEWSLTTRCHLQAAISLSFHLWNWMIKQLKCHRNFSMGIHYDHAQ		90	1.07e-37	gi|920152395|dbj|BAS23841.1| Conotoxin Superfamily T [Conus episcopatus]
Ct-1044	5.35	XIV	None			MCSAFPTLIGYFFSSSRFSFKSSTSKAYVLICNCRLVCLMS		71.875	2.24e-09	gi|1247123407|gb|ATF27752.1| conotoxin [Conus praecellens]
Ct-1045	5.03	XV	cluster_01	MSTLGMVLLLFLLLLPLGNS	DGDGDRQAMDRDRTASEARSAPRLRLRRHMDRGRSVDKR	CSTITCGGDCCASSECTCTSHGGTGNEVGCSCPAMILL		82.474	2.02e-45	gi|948542573|gb|ALM87497.1| Conotoxin [Conus betulinus]
Ct-1048	16.83	XXIII	?	MKFFACLLFSLVVLTMVFNHVDG		HRQCDPCAGIIGHCGNCCTCYPKT	GRKRADGLRSRMKEPAGERNLLKLLSFH	51.282	1.53e-14	sp|A0A125S9G2|CXN5_CONIM Conotoxin Im23.5 OS=Conus imperialis OX=35631 PE=1 SV=1
Ct-1049	1.7	VI/VII	cluster_06	MRFYMLLAVALLLNSVMS	TDDVSIHQTDAKRQQKK	DDDDNCPNSHPYFCLSVHVDNCCKNPCDSGNRCNSNEYEIL		73.684	5.54e-38	gi|1446202368|gb|AXL95486.1| conotoxin-like precursor unassigned superfamily 01 [Conus ermineus]
Ct-1050	44.82	V	?	MLRLPIFLILLLSLSSAAG	FPAESELQRDLALQSPKDFGMRTDHLLLKK	VGDDCCVDGHIGTCC	KK	70.769	1.05e-28	gi|1004614450|gb|AMP44631.1| conotoxin [Conus betulinus]
Ct-1051	113.24	VI/VII	cluster_06	MRFYMLLAVALLLNSVMS	TDDVSIHQTDAKRQQKK	DDDDNCPNSHPYFCLSVHVDNCCKNPCDSGNRCNSNDYQIL	G	72.727	2.43e-38	gi|1446202368|gb|AXL95486.1| conotoxin-like precursor unassigned superfamily 01 [Conus ermineus]
Ct-1056	29.57	None	O1	MKLTCMMIVAVMFLTAWTFVTA		DDSINGLENRGIWGEPLSKARDEMKNPEASKLNKRYVPVGE		80.952	1.79e-32	P06842|Ml6.7 precursor|Conus miliaris|Precursor|conotoxin|O1 superfamily|VI/VII||
Ct-1062	128.78	VI/VII	O1	MKLTCMMIVAVLFLTAWTSVMA	DGSINRPDIAEGWQNFFSKAHDEMKNRAASELNKR	CVPFGEVCGVVECCSGRCLVICMP		79.762	1.39e-46	sp|M9PQ91|O164_CONBE Delta-conotoxin-like Bt6.4 OS=Conus betulinus OX=89764 PE=3 SV=1

## Sheet: Supplementary_Table_S3
Sample Species	Sample Code	Top Hit Accession	Top Hit Description	Top Hit Species	% Identity	E-value
C. eburneus	Ce-0373	AFU50792.1	Conantokin-F peptide precursor Fla-5a	C. flavidus	85	6.81e-55
C. tessulatus	Ct-0825	AFU50792.1	Conantokin-F peptide precursor Fla-5a	C. flavidus	87	1.24e-55
C. tessulatus	Ct-0875	AFU50792.1	Conantokin-F peptide precursor Fla-5a	C. flavidus	86	6.51e-55
C. tessulatus	Ct-0694	AFU50792.1	Conantokin-F peptide precursor Fla-5a	C. flavidus	87	1.24e-55
C. tessulatus	Ct-0077	ADZ72979.1	Conantokin E1 precursor	C. eburneus	95.918	8.72e-61
C. tessulatus	Ct-0767	ADZ72979.1	Conantokin E1 precursor	C. eburneus	90.625	1.64e-55
C. tessulatus	Ct-0781	AFU50792.1	Conantokin-F peptide precursor Fla-5a	C. flavidus	85	3.13e-54
C. tessulatus	Ct-0767	ADZ72979.1	Conantokin E1 precursor	C. eburneus	95.918	4.71e-61

## Sheet: Supplementary_Table_S4
SeqID	Signal	Pre	Mature	Post	Framework	Superfamily	Conoserver_Hit	Percent_ID	Peptide_Class
Ce-0006			DQTADRHADERDQDLAEQYQNLKRVLKRGWVYHAHPDANSWWSLV		None	None	Conomarphin-Bt3_precursor_Conus_betulinus_P05914	97.778	conomarphin
Ce-0033	MSKLGVVLCIFLILFPMATL		QLDGDQTADRHADERDQDLAEQYRNLKRVLKRGWVYHAHPEPNSFWTLV		None	?	Conomarphin-Bt2_precursor_Conus_betulinus_P05913	95.918	conomarphin
Ce-0038			ARSTDDNGKDRLTQRKRILKKRGNKARGGEEDRETVEELHEMGKR		None	None	Conantokin-E2_precursor_Conus_ermineus_Atlantic_fish-hunting_cone_P08472	77.778	conantokin
Ce-0042	MQLYTHLYLLVPLVTFHLILGTGTLA		HGGALTERRSADATALKPEPVLLQKSAARSTDDNGKDRLTQMNRMLKKRGNAARGAEEDRETVEELHEMGKR		None	?	Conantokin-Eu1_precursor_Conus_eburneus_P04495	89.855	conantokin
Ce-0044	MQLYTHLYLLVPLVTFHLILGTGTLA		HGGALTERRSADATALKPEPVLLQKSAARSTDDNGKDRLTQMKRILKKRGNKARGGEEDRETVEELHEMGKR		None	?	Conantokin-Eu1_precursor_Conus_eburneus_P04495	86.957	conantokin
Ce-0055	MTRSAMQMGRLTLVLCLLLLLLLTTQA		CFIRNCPEGGKRDVEDRYPTNLCMFCSFGQCVGPHICCGAGRCEMGTAEANRCSEEDDDPIPCQVLGSHCILNNPGNIYGNCVSNGICCVDDTCSIHSGC		None	?	conophysin-conopressin_Eb_precursor_Conus_ebraeus_P08938	76	conopressin
Ce-0067	MSKLGVVLCIFLILIPMATL		QLDGDQTADRHADKRDQDLAEQYRNLKRVLKRGWVYYAHPHSNAVFSLV		None	?	Conomarphin-Bt3_precursor_Conus_betulinus_P05914	85.714	conomarphin
Ce-0070			NMQGMQGLPMPGIASEFLPFNPNLGLGYRREVDENLEKR		None	None	Conantokin-T31_precursor_Conus_tulipa_tulip_cone_P07968	65	conantokin
Ce-0082	MSKLGVVLCIFLILIPMATL		QLDGDQTADRHADERDQDLAEQYRNLKRVLKRGWVYHTHPEPNSWWTLV		None	?	Conomarphin-Bt3_precursor_Conus_betulinus_P05914	91.837	conomarphin
Ce-0103			ATLQLDGDQTAVRHADERDLDLAEQYRYLKRVLKRGWVY		None	None	Conomarphin-Bt3_precursor_Conus_betulinus_P05914	92.308	conomarphin
Ce-0119			PEPVLLQKSAARSTDDNGKDRLTQMNRILKKRGNAARDAEEVRESAETLHEISVY		None	None	Conantokin-Eu1_precursor_Conus_eburneus_P04495	100	conantokin
Ce-0132	RMTRSAMQMGRLTLVLCLLLLLLLLTTQA		CFIRDCPKGGKRDVEDRHPTKACMRCSFGQCVGPHICCGAGGCEMGTAEANRCGEEDDDPTPCQVLGSHCILNNPGNIYGHCVSNGICCVDDTCSIHSGC		None	?	conophysin-conopressin_Lo2_precursor_Conus_loroisii_P08933	77	conopressin
Ce-0155	SKLGVVLCIFLILFPMATL		QLDGDQTADRHADERDQDLAEQYRNLKRVLKRGWVYHPHTHYNSMWSLV		None	?	Conomarphin-Bt3_precursor_Conus_betulinus_P05914	89.796	conomarphin
Ce-0157			TADRHADDRDQDLAEQFRNLKRVLNRGWVYHARPGANSWWTLV		None	None	Conomarphin-Bt3_precursor_Conus_betulinus_P05914	86.047	conomarphin
Ce-0165			AHGGALTERRSADATALKPEPVLLQKSAARSTDDNGKDRLTQMKRILKKRGNKARGWEEDREIAETVRELEEIGRR		None	None	Conantokin-Qc1_precursor_Conus_quercinus_P07814	89.474	conantokin
Ce-0172	MQLYTHLYLLVPLVTFYLILGTGTPAHG		GALTERRSADATALKPEPVLLQKSAARSTDDNGKDRLTQMKRILKKRGNTARDAEEVRESAETLHEISVY		None	?	Conantokin-Eu1_precursor_Conus_eburneus_P04495	97.143	conantokin
Ce-0179	LQLGTETVTATIGKSMLGSLSMMQSFTCLSLLVPLLFFHLTQRSDT		ADHEGIAMEVRSADRNLKRFLHDFRRASKRRNDGRYDRKRELSVLLDSQLLTESYNEGQERLAESSTGTLEAIGR		None	?	Conantokin-Eu2_precursor_Conus_eburneus_P04568	64	conantokin
Ce-0192	TFYLILGTGTLAHGGALT		ERRSAEATALKPEPVLLQKSAARSTDGNGKDRLTQMNRILKKRGNAARGAEEDRETVEELHEMGRR		None	?	Conantokin-Eu1_precursor_Conus_eburneus_P04495	87.302	conantokin
Ce-0200			DEERSTPQPHRELTATVKVKKDQKRFAMSKLGVVLCIFLILYPMATLQLDGDQTADRHADERDQDL		None	None	Conomarphin-Bt1_precursor_Conus_betulinus_P05912	97.436	conomarphin
Ce-0232			QNPTAGGRLFERHQAGYSRTQQLVDACLRGFRLVTPEQW		None	None	conomarphin-Vc2_precursor_Conus_victoriae_P06366	70	conomarphin
Ce-0234	MGKLTILVLVAAALLSTQVMVQG	DGDQPEDRDAVPRDDNPGGTSGKFMNVLR	QSGCPWSPWC	G	None	O2	contryphan-Pu2_precursor_Conus_pulicarius_P05681	90	contryphan
Ce-0260	MSKLGVVLCIFLILFPMATL		QLDGDQTADRHADERDQDLAGQYRNLKRVLKRGWVYHANPEANSWWTLV		None	?	Conomarphin-Bt1_precursor_Conus_betulinus_P05912	100	conomarphin
Ce-0268			PEPVLLQKSAARSTDDNGKDRLTQMNRMLKKRGNAARGAEEDRETVEELHEMGRR		None	None	Conantokin-Eu1_precursor_Conus_eburneus_P04495	86.538	conantokin
Ce-0274	MQSFTCTCLLVPLLFFHLTQRSDT		ADHEGAAMEVRSADRTLKRFLHNFRRTPKRRNDGRYDRKWDLSVRLDMRLLVESYREGGQRRVEASMEKLREIGR		None	?	Conantokin-Eu2_precursor_Conus_eburneus_P04568	69.333	conantokin
Ce-0285			PEPVLLQKSAARSTDDNGKDRLTQMKRILKKRGNKARGWEEDREIAETVRELEEIGKR		None	None	Conantokin-Qc1_precursor_Conus_quercinus_P07814	91.379	conantokin
Ce-0294	MQLYTYLYLLVPLVTFYLILGTGTPAHG		GALTERRSADATALKPEPVLL		None	B1	Conantokin-E1_precursor_Conus_ermineus_Atlantic_fish-hunting_cone_P08464	100	conantokin
Ce-0349	MGKLTILVLVAAALLSTQVMVQG	DGDHLADRDAVPRDDNPGGTREKIMNALRRF	GCPPGLWC	G	None	O2	Contryphan-Bt1_precursor_Conus_betulinus_P05916	100	contryphan
Ce-0368	LCIFLILFPMATLQLDG		DQTADRHADERDQDLAGQYLNLKRVLKRGWVYHAHPEPNSFWTLV		None	?	Conomarphin-Bt2_precursor_Conus_betulinus_P05913	97.778	conomarphin
Ce-0370	MQLYTYLYLLVPLVTFHLILGTGTLA		HGGALTERRSADATALKPEPVLLQKSAARSTDDNGKDRLTQRKRILKKRGN		None	B1	Conantokin-Eu1_precursor_Conus_eburneus_P04495	96.078	conantokin
Ce-0373	MQLYTYLYVLVPLVTFYLILGTGTLA		HGGALTERRSAEATALKPEPVLLQKSAARSTDDNGKDRLTQRKRILKKRGNKARGWEEDREIAETVRELEEIGRR		None	B1	Conantokin-Qc1_precursor_Conus_quercinus_P07814	86.667	conantokin
Ce-0374			LILGTGTLAHGGALTERRSADATALKPEPVLLQKSAARSTDDNGKDRLTQRKRILKKRGNAARDAEEVRESAETLHEISVY		None	None	Conantokin-Eu1_precursor_Conus_eburneus_P04495	97.531	conantokin
Ce-0375	MQSARIASSRPKYSLAMQLYTHLYLLVPLVTFHLILGTGTLA		HGGALTERRSADATALKPEPVLLQKSAARSTDGNG		None	?	Conantokin-Eu1_precursor_Conus_eburneus_P04495	97.143	conantokin
Ce-0377	MQLYTYLYVLVPLVTFHLILGTGTLA		HGGALTERRSADATALKPEPVLLQKSAARSTDGNG		None	?	Conantokin-Eu1_precursor_Conus_eburneus_P04495	97.143	conantokin
Ce-0399	TFYLILGTGTLAHGGALT		ERRSAEATALKPEPVLLQKSAARSTDGNGKDRLTQRKRILKKRGNKARGWEEDREIAETVRELEEIGRR		None	?	Conantokin-Qc1_precursor_Conus_quercinus_P07814	86.957	conantokin
Ce-0410	MSKLGVELCIYLILFHMATHQLDG		DQTDDRHAEERDQDLAGHYRNLKRDQKRGWVYHANPEPNSFWTLV		None	?	Conomarphin-Bt2_precursor_Conus_betulinus_P05913	84.444	conomarphin
Ce-0456	MTRSAMQMGRLTLVLCLLLLLLLLTTQA		CFIRDCPKGGKRDVEDRHPTKACMRCSVGQCVGPHICCGAGGCEMGTAEANRCGEEDDDPTPCQVLGSHCILNNPGNIYGHCVSNGICCVDDTCSIHSGC		None	?	conophysin-conopressin_Lo2_precursor_Conus_loroisii_P08933	76	conopressin
Ce-0462	TFYLILGTGTLAHGGALT		ERRSADATALKPEPVLLQKSAARSTDDNGKDRLTQRNRILKKRGNAARDAEEVRESAETLHEISVY		None	?	Conantokin-Eu1_precursor_Conus_eburneus_P04495	98.485	conantokin
Ce-0491	GVVLCIFLILFPMATL		QLDGDQTADRHADKRDQDLAEQYRNLKRVLKRGWVYHTHPEPNSWWTLV		None	?	Conomarphin-Bt3_precursor_Conus_betulinus_P05914	89.796	conomarphin
Ce-0510	MGKLTILVLVAAALLSTQVMVQG	DGDQPEDRDAVPRDDNPGGTSGKFMNILRRS	GCPWSPWC	G	None	O2	Contryphan-S_precursor_Conus_striatus_Striated_cone_P03548	87.5	contryphan
Ce-0537	MELYTHLYLLVPLVTFHLILGTGTLA		HGGALTERRSADATALKPEPVLLQKSAARSTDGNG		None	?	Conantokin-Eu1_precursor_Conus_eburneus_P04495	97.143	conantokin
Ce-0556			DGLGNLMNFMKENGNNLPFAQMDNGAADIGNFEPSAEKEDAENRIYDEQQ		None	None	Conantokin_Ba2_Conus_bayani_P10136	48.077	conantokin
Ce-0577	GVVLCIFLILFPMATL		QLDGDQTADRHADERDQDLAEQYRNLKRVLKRGWVYHAHPDANSWWSLV		None	?	Conomarphin-Bt3_precursor_Conus_betulinus_P05914	100	conomarphin
Ce-0579	MTRSAMQMGRLTLVLCLLLLLLLLTAQA		CFIRNCPKGGKRDVEDRHPTKSCMRCSVGQCVGPHICCGAGGCEMGTAEANRCGEEDDDPTPCQVLGSHCILNNPGNIYGNCVSNGICCVDDTCSIHSGC		None	?	conophysin-conopressin_Eb_precursor_Conus_ebraeus_P08938	73	conopressin
Ce-0627			RERERETDRQTDRQIDRQTDRQVGKEGESTVSDYGRDVDENLEKRKHHSKFNEDNKSPFSAEDGLGNFMNFMKENGNNLPFAQMDNGAPDLGNFEPSAEKEDGKFRFFDEQQ		None	None	Conantokin_Ba2_precursor_Conus_bayani_P10137	60	conantokin
Ce-0652	MSKLGVVLCIFLILFPMATL		QLDGDLTADRLADDWVQELAEQYRKLKRVLIRG		None	?	conomarphin-Vc2_precursor_Conus_victoriae_P06366	72.727	conomarphin
Ce-0658	MMSKLVVLLTICLLLFPLTA		VQLDGDKPADLPALRTKDIATDHRP		None	?	conomarphin-Vc1_precursor_Conus_victoriae_P06367	52	conomarphin
Ce-0665	MSKLGVVLCIFLIQFPMATL		QQDGDQTADRQADERDQDQAGQYRNMKRVVKRGWVYHSHPDANSWWA		None	?	Conomarphin-Bt3_precursor_Conus_betulinus_P05914	82.979	conomarphin
Ce-0679			MATLQLDGDQTADRHADERDQDLAEQYQNLKRVLKRGWAYHPH		None	None	Conomarphin-Bt3_precursor_Conus_betulinus_P05914	93.023	conomarphin
Ce-0723	MSKLGVVLCIFLILIPMATL		QLDGDQTADRHADERDQDLAGQYQNLKQFLKRGWVYHANPEANSWWT		None	?	Conomarphin-Bt1_precursor_Conus_betulinus_P05912	93.617	conomarphin
Ce-0755			LILGTGTLAHGGALTERRSADATALKPEPVLLQKSAARSTDDNGKDRLTQRKRILKKRGNTARDAEEVRESAETLHEISVY		None	None	Conantokin-Eu1_precursor_Conus_eburneus_P04495	96.296	conantokin
Ce-0772			RADGHSYVKKGEKRFKILNMGLVLFIFLVLFPLATLQLEADQPVERQQDLNVGDTRGIMM		None	None	Conomarphin-Bt3_precursor_Conus_betulinus_P05914	57.576	conomarphin
Ce-0826	MSKLGVVLCIFLILFPMATL		QLDGDQTADRHADKRDQDLAEQYLNLKRVLKRGWVYHGHPHYNTVWSLV		None	?	Conomarphin-Bt3_precursor_Conus_betulinus_P05914	85.714	conomarphin
Ce-0867	MTRSAMQMGRLTLVLCLLLLLLLLTTQA		CFIRNCPEGGKRDVEDRYPTNLCMFCSFGQCVGPHICCGAGGCEMGTAEANRCGEEDDDPTPCQVLGSHCILNNPGNIYGHCVSNGICCVDDTCSIHSGC		None	?	conophysin-conopressin_Eb_precursor_Conus_ebraeus_P08938	76	conopressin
Ce-0889	YTYLYLLVPLVTFHLILGTGTPAHG		GVLTERRSADATALKPEPVLLQKSAA		None	?	Conantokin-Eu1_precursor_Conus_eburneus_P04495	96.154	conantokin

## Sheet: Supplementary_Table_S5
SeqID	Signal	Pre	Mature	Post	Framework	Superfamily	Conoserver_Hit	Percent_ID	Peptide_Class
Ct-0005	MQLYTYLYLLVPLVTFHLILGTGTLA		HGGALTERRSADATALKPEPVLLQKSAARSTDDNGKDRLTQMNRMLKKRGNMARGAEEVRESAETLHEISVY		None	B1	Conantokin-Eu1_precursor_Conus_eburneus_P04495	95.833	conantokin
Ct-0026	MGKLTILVLVAAALLSTQVMVQG	DGDQPADRNAEPRDDNPGGASGEFMNVLRRS	GCPWEPWC	G	None	O2	Contryphan-S_precursor_Conus_striatus_Striated_cone_P03548	100	contryphan
Ct-00262	MGKLTILVLVAAALLSTQVMVQG	DGDHLADRDAVPRDDNPGGTREKIMNALRRF	GCPPGLWC	G	None	O2	Contryphan-Bt1_precursor_Conus_betulinus_P05916	100	contryphan
Ct-0061	MGKLTILVLVAAALLSTQVMVQG	DGDHLADRDAVPRDDNPGGTREKIMNALRRF	GCPPGLWC	G	None	O2	Contryphan-Bt1_precursor_Conus_betulinus_P05916	100	contryphan
Ct-0075	TFHLILGTGTLAHGGALT		ERRSAEATALKPEPVLLQKSAARSTDDNGKDRLTQRNRILKKRGNMARGAEEIRESAETLHEISVY		None	?	Conantokin-Eu1_precursor_Conus_eburneus_P04495	92.424	conantokin
Ct-0077	MQLYTYLYLLVPLVTFHLILGTGTLA		HGGALTERRSADATALKPEPVLLQKSAARSTDDNGKDRLTQRKRMLKKRGNAARDAEEVRESAETLHEISVY		None	B1	Conantokin-Eu1_precursor_Conus_eburneus_P04495	95.833	conantokin
Ct-0100			MNFMKENGNNLPFAQMDNGAPDHGNFEPSAEKEDGKFRFFDEQQKTTETCVRKEHTERMHAVLTTGDRKQTNNTNNKRE		None	None	Conantokin_Ba2_Conus_bayani_P10136	56.818	conantokin
Ct-0106	MLRLIIAAVLASACLA		YPQKRDGAPADSANLQPFDAGMQAMPAMPNMQGMQGLPMPGMAGQFLPFNPNFGLGYRRDVDENLEKRKHHSKFNEDNKSPFSAEDGLGNFMNFMKENGNNLPFAQMDNGAPDLGNFEPSAEKEDGKFRFFDEQQ		None	?	Conantokin_Ba2_precursor_Conus_bayani_P10137	55.034	conantokin
Ct-0114			QYRNLKRVLKRGWVYHAHPHSIPCGRLFERHQAGYSRTVVI		None	None	conomarphin-Vc2_precursor_Conus_victoriae_P06366	65.854	conomarphin
Ct-0229	MSKLGVVLCIIQILFPMAT		IKLDGDQTADRHEDERDQGLAGQYRNLKRGLKRGWV		None	?	Conomarphin-Bt1_precursor_Conus_betulinus_P05912	86.111	conomarphin
Ct-0235			LQLDGDQTADRHADEWDQDLAEQYRNLKRVLKRGWVYYAHPHSNAVFSLI		None	None	Conomarphin-Bt3_precursor_Conus_betulinus_P05914	84	conomarphin
Ct-0240	SVVNGCGLQNSFTQGVLNQDRLQDRMTRSAMQMGRLTLVLCLLLLLLLTAQA		CFIRNCPKGGKRDVEDRHPTKACMPCSFGQCVGPHICCGAGGCEMGTAEANRCGEEDDDPTPCQVLSSHCILNNPGNIYGHCVSNGICCVDDTCSIHSGC		None	?	conophysin-conopressin_Lo2_precursor_Conus_loroisii_P08933	77	conopressin
Ct-0275	KSVVNGCGLQNSFTQGVLNQDRLQDRMTRSAMQMGRLTLVLCLLLLLLLLTAQA		CFIRDCPTGGKRDVDERHPTKACMRCSFGQCVGPHICCGAGGCEMGTAEANRCGEEDDDPTPCQVLSSHCILNNPGNIYGHCVSNGICCVDDTCSIHSGC		None	?	conophysin-conopressin_Lo2_precursor_Conus_loroisii_P08933	78	conopressin
Ct-0317			RRSADATALKPEPVLLQKSAARSTNDDGKDRLTQRKRILKKRGNAARGAEEDRETVEELHEMGRR		None	None	Conantokin-Eu1_precursor_Conus_eburneus_P04495	83.871	conantokin
Ct-0320	MKRRTFIMRKLTILVHVAAALLTTQVMVQG	DGDQPADRNAEPRDDNPGGASGKFMNVL	LPTGCPWASWC	G	None	?	Contryphan-Li1_precursor_Conus_lividus_P09758	72.727	contryphan
Ct-0341	MSKLGVVLCIFLILFPMATL		QLDGDQTADRHADERDQGLAGQYRNLKRVLKRGWVYHAHPDANSWWSLV		None	?	Conomarphin-Bt3_precursor_Conus_betulinus_P05914	95.918	conomarphin
Ct-0373	MSKLGVVLCIFLILFPMATL		QLDGDQTADRHADERDQDLAEQYRNLKRVLKRGWVYHAHPHSNTMWSLV		None	?	Conomarphin-Bt3_precursor_Conus_betulinus_P05914	91.837	conomarphin
Ct-0374	MSKLGVVLCIFLILFPMATL		QLDGDQTADRHADERDQDLAEQYRNLKRVLKRGWVYQANPEANSWWTLV		None	?	Conomarphin-Bt1_precursor_Conus_betulinus_P05912	95.918	conomarphin
Ct-0375	MSKLGVVLCIFLILFPMATL		QLDGDQTADRHADERDQDLAEQYRNLKRVLKRGWVYQANPDANTWFSLV		None	?	Conomarphin-Bt3_precursor_Conus_betulinus_P05914	91.837	conomarphin
Ct-0387			RQGTVSPTATPRADSHSYVKKGGERFVMLKMGVVLFTFLVLFPLATLQLDADQPVERYAENKQDLNPDER		None	None	conomarphin-Mr1_precursor_Conus_marmoreus_P06163	59.091	conomarphin
Ct-0442	FIMGKLTILVLVAAALLSTQVMVQG	DGDHLADRDAVPRDDNPGGTSEKIMNALRRF	GCPPGLWC	G	None	O2	Contryphan-Bt1_precursor_Conus_betulinus_P05916	100	contryphan
Ct-0473	MGKLTILVLVAAALLSTQVMVQG	DGDQPADRNAEPRDDNPGGASGEFMNVLRRS	GCPWQPWC	G	None	O2	Contryphan-Sm_precursor_Conus_stercusmuscarum_P01311	100	contryphan
Ct-0507			QLDGDQTADRHADERDQDLAEQYRNLKRVLKRGWVYHPHTHYNTMWSLV		None	None	Conomarphin-Bt3_precursor_Conus_betulinus_P05914	87.755	conomarphin
Ct-0544	MGKLTILVLVAAALLSTQVMVQG	DGDHLADRDAVPRDDNPGGASGEFMNVLRRS	GCPWEPWC	G	None	O2	Contryphan-S_precursor_Conus_striatus_Striated_cone_P03548	100	contryphan
Ct-0585	KSVVNGCGLQNSFTQGVLNQDRLQDRMTRSAMQMGRLTLVLCLLLLLLLTAQA		CFIRNCPKGGKRDVEDRHPTKACMPCSFGQCVGPHICCGPGGCEMGTAEANRCGEEDDDPTPCQVLSSHCILNNPGNIYGHCVSNGICCVDDTCSIHSGC		None	?	conophysin-conopressin_Eb_precursor_Conus_ebraeus_P08938	75	conopressin
Ct-0633	MGKLTILVLVAAVLLSTQVMVQG	DGDQPADRNAEPRDDNPGGASGKFMNVL	LPTGCPWASWC	G	None	O2	Contryphan-Li1_precursor_Conus_lividus_P09758	72.727	contryphan
Ct-0662			MATLQLDGDQTADRHADERDQDLAGQYRNLKRVLKRGWVYQANPDANTWFSLV		None	None	Conomarphin-Bt1_precursor_Conus_betulinus_P05912	90.566	conomarphin
Ct-0674			LQLDGDQSADRHADERDQDLAEQYRNLKRVLKRGWVYHAHPDANSWWSLV		None	None	Conomarphin-Bt3_precursor_Conus_betulinus_P05914	98	conomarphin
Ct-0676			RHADERDKDLAEQYLNLKRVLKKGWVYHAHTHSNTMWSLV		None	None	Conomarphin-Bt3_precursor_Conus_betulinus_P05914	80	conomarphin
Ct-0694	MQLYTHLYLLVPLVTFYLILGTGTLA		HGGALTERRSADATALKPEPVLLQKSAARSTDGNGKDRLTQRKRILKKRGNKARGWEEDREIAETVRELEEIGRR		None	B1	Conantokin-Qc1_precursor_Conus_quercinus_P07814	86.667	conantokin
Ct-0716	MSKLGVVLCIFLILFPMATL		QLDGDQTADRHADERDQGLAGQYRNLKQFLKRGWVYQANPEANSWWTLV		None	?	Conomarphin-Bt1_precursor_Conus_betulinus_P05912	91.837	conomarphin
Ct-0727			KDRLTQVKRILKKRGNTARGWEEDLELAETVSELEEIGKR		None	None	conantokin-Pu2_precursor_Conus_pulicarius_P05676	87.5	conantokin
Ct-0766	MSKLGVVLCIFLILFPMATL		QLDGDQPADRHADERDQGLAGQYRNLKRVLKRGWVYQANPDANTWFSLV		None	?	Conomarphin-Bt1_precursor_Conus_betulinus_P05912	85.714	conomarphin
Ct-0767	MQLYTYLYLLVPLVTFHLILGTGTLA		HGGALTERRSADATALKPEPVLLQKSAARSTDDNGKDRLTQMNRMLKKRGNAARGAEEDRETVEELHEMGRR		None	B1	Conantokin-Eu1_precursor_Conus_eburneus_P04495	89.855	conantokin
Ct-0781	MQLYTYLYLLVPLVTFHLILGTGTLA		HGGALTERRSADATALKPEPVLLQKSAARSTDDNGKDRLTQRKRMLKKRGNTARGWEEDLELAETVSELEEIGKR		None	B1	conantokin-Pu2_precursor_Conus_pulicarius_P05676	88	conantokin
Ct-0803			LEGDQHADRPADRMQDIATEQHPLFDPVKRSSSGQIDNTQDNENEEK		None	None	conomarphin-Vc1_precursor_Conus_victoriae_P06367	46.667	conomarphin
Ct-0814	MSKLGVVLCIFLILFPMATL		QLDGDQTADRHADERDQDLAEQYRNLKRVLKRGWAYHPH		None	?	Conomarphin-Bt3_precursor_Conus_betulinus_P05914	94.872	conomarphin
Ct-0824	MGKLTILVLVAAALLSTQVMVQG	DGDQPEDRDAVPRDDNPGGTSGKFMNVLR	QSGCPWSPWC	G	None	O2	contryphan-Pu2_precursor_Conus_pulicarius_P05681	90	contryphan
Ct-0825	MQLYTYLYLLVPLVTFHLILGTGTLA		HGGALTERRSADATALKPEPVLLQKSAARSTDGNGKDRLTQRKRILKKRGNKARGWEEDREIAETVRELEEIGRR		None	B1	Conantokin-Qc1_precursor_Conus_quercinus_P07814	86.667	conantokin
Ct-0832	MQLYTHLYMLVPLVTFYLILGTGTLA		HGGALTERRSADAT		None	?	Conantokin-T20_precursor_Conus_tulipa_tulip_cone_P07957	100	conantokin
Ct-0870	MGKLTILVLVAAALLSTQVMVQG	DGDQPEDRDAVPRDDNPGGTSGKFMNVLRRS	GCPWQPWC	G	None	O2	Contryphan-Sm_precursor_Conus_stercusmuscarum_P01311	100	contryphan
Ct-0875	MQLYTYLYLLVPLVTFYLILGTGTLA		HGGALTERRSADATALKPEPVLLQKSAARSTDGNGKDRLTQRKRILKKRGNKARGWEEDREIAETVRELEEIGRR		None	B1	Conantokin-Qc1_precursor_Conus_quercinus_P07814	86.667	conantokin
Ct-0879			PEPVLLQKSAARSTDDNGKDRLTQMNRILKKRGNTARGAEEIRESAETLHEISVY		None	None	Conantokin-Eu1_precursor_Conus_eburneus_P04495	94.545	conantokin
Ct-0882	SPSSQLYTPASLCDHLNLINMLRLIIAAVLASACLA		YPQKRDGAPADAANLQPFDAGMQAMPAMPNMQGMQGLPMP		None	?	Conantokin-T31_precursor_Conus_tulipa_tulip_cone_P07968	75	conantokin
Ct-0899	MSKLVVALCFFLILFPMATL		QLDGDQTADLHADERDQGLAGQYRNLKRVLKRGW		None	?	Conomarphin-Bt1_precursor_Conus_betulinus_P05912	94.118	conomarphin
Ct-0913			SSFGQEHSCEPDAAPHPEGTCGPQLSERHEELCEKEESLH	G	None	None	insulin-like_peptide-1_precursor_Conus_victoriae_P06729	55.263	insulin
Ct-0917	MGKLTILVLVAAVLLSTQVMVQG	DGDQPADRNAEPRDDNPGGASGEFMNVLRRS	GCPWEPWC	G	None	O2	Contryphan-S_precursor_Conus_striatus_Striated_cone_P03548	100	contryphan
Ct-0927	MQLYTYLYLLVPLVTFYLILGTGTLA		HGGALTERRSADATALKPEPVLLQKSAARSTDDNGKDRLTQMN		None	B1	Conantokin-Eu1_precursor_Conus_eburneus_P04495	100	conantokin
Ct-0930			ADATALKPEPVLLQKSAARSTDDNGKDRLTQRKRILKKRGNKARGWEEDREIAETVRELEEIGRR		None	None	Conantokin-Qc1_precursor_Conus_quercinus_P07814	89.231	conantokin
Ct-0933	LAMQLYTYLYLLVPLVTFYLILGTGTLA		HGGALTERRSADATALKPEPVLLQKSAARSTNDDGKDRLTQVKRMLKKRGNAARGAEEDRETVEELHEMGKR		None	B1	Conantokin-Eu1_precursor_Conus_eburneus_P04495	84.058	conantokin
Ct-0982			EDGIGNFMNFMKENGYNLPFAQMDNGAPDLGNFEPSAEK		None	None	Conantokin_Ba2_Conus_bayani_P10136	55.263	conantokin
Ct-0996	MSKLGVVLCIFLILFPMATL		QLDGDQTADRHADERDQGLAGQYRNLKRVLKRGWVYQANPDANTWFSLV		None	?	Conomarphin-Bt1_precursor_Conus_betulinus_P05912	87.755	conomarphin
Ct-1031			MATLQLDGDQTADRHADERDQDLAGQYRNLKQFLKRGWVYQANPEANSWWTLV		None	None	Conomarphin-Bt1_precursor_Conus_betulinus_P05912	94.34	conomarphin
Ct-1034	MSKLGVVLCIFLILFHMATL		QLEGDQTADRHADERDQGQAGQYRNLKRVLIRGWVYQAN		None	?	Conomarphin-Bt1_precursor_Conus_betulinus_P05912	87.179	conomarphin
Ct-1058			RRSADATALKPEPVLLQKSAARSTNDDGKDRLTQRKRILKKRGNAARGAEEVRESAETLHEISVY		None	None	Conantokin-Eu1_precursor_Conus_eburneus_P04495	92.308	conantokin
Ct-1063			VCCSDLPMRGMAGQFLPFNPNFVLGY	RRDVDENLEKRKHHSKFNEDNKSPFSAEDGLGNF	None	None	Conantokin-T31_precursor_Conus_tulipa_tulip_cone_P07968	68.182	conantokin

## Sheet: Supplementary_Table_S6
Diet of Top Conoserver Match	Cumulative Ave. Expression in TPM
	C. eburneus	C. tessulatus
Vermivorous	158,875.08 (53,400.94)	121,088.99 (36,896.68)
Piscivorous	28,967.05 (9,615.61)	42,638.89 (14,053.05)
Molluscivorous	85,549.08 (20,912.74)	49,644.63 (13,093.09)

## Sheet: Supplementary_Table_S7
Species	Sample #	Total Sequences		% Retained
		Before QC	After QC
eburneus	1	24278606	22421732	92.3518
	2	25296352	23929462	94.5965
	3	15510972	14604426	94.1555
tessulatus	1	22101592	20495816	92.7346
	2	25208046	23133146	91.7689
	3	29643380	27726082	93.5321
